# Supplementary material for: Infection-Induced Resistance to Experimental Cerebral Malaria Is Dependent Upon Secreted Antibody-Mediated Inhibition of Pathogenic CD8+ T Cell Responses
Source: Front Immunol. 2019 Feb 19;10:248. doi: 10.3389/fimmu.2019.00248 (PMC6394254; doi:10.3389/fimmu.2019.00248)
Supplement: Supplementary Table 2 — List of differentially expressed genes included within Figure 2 and Figure S2. [file Table_2.XLSX]

## Sheet: Sheet1
Supplementary Table 2: List of differentially expressed genes included within Figure 2 and Figure S2
order	Probe_name	Representative_Public_ID	Gene_Title	Gene_Symbol	Fold-Change(1X vs naive)	p.value (1X vs naive)	q.value.1X vs naïve	Fold-Change(4X vs naive)	p.value.4X vs naïve	q.value.4X vs naïve	Cluster
1	1438648_x_at	AV069898	gastrokine_3	Gkn3	-2.2	0	0	-1.9	0	0	Cluster1
2	1417574_at	NM_013655	chemokine_(C-X-C_motif)_ligand_12	Cxcl12	-2	0	0	-1.9	0	0	Cluster1
3	1429286_at	AK004474	gastrokine_3	Gkn3	-4.6	0	0	-3.7	0	0	Cluster1
4	1435418_at	AV330315	solute_carrier_family_22_(organic_anion_transporter),_member_8	Slc22a8	-1.8	0	0	-1.6	0	0	Cluster1
5	1460000_at	BB740315	shisa_homolog_3_(Xenopus_laevis)	Shisa3	-1.8	0.001	0.002	-1.7	0.002	0.048	Cluster1
6	1427683_at	X06746	early_growth_response_2	Egr2	-2	0.002	0.002	-1.9	0.002	0.056	Cluster1
7	1426001_at	AB031037	eomesodermin_homolog_(Xenopus_laevis)	Eomes	-1.7	0	0	-1.6	0	0.006	Cluster1
8	1438884_at	AV277495	shisa_homolog_3_(Xenopus_laevis)	Shisa3	-1.9	0.002	0.003	-1.9	0.002	0.058	Cluster1
9	1451047_at	BI966443	integral_membrane_protein_2A	Itm2a	-2.5	0	0	-1.5	0	0	Cluster1
10	1436367_at	BB119527	protein_tyrosine_phosphatase,_receptor_type,_B	Ptprb	-1.7	0	0	-1.3	0.002	0.06	Cluster1
11	1450068_at	BB253608	bromodomain_adjacent_to_zinc_finger_domain,_1B	Baz1b	-1.6	0.002	0.003	-1.3	0.105	0.349	Cluster1
12	1418979_at	NM_134072	aldo-keto_reductase_family_1,_member_C14	Akr1c14	-2	0	0	-1.3	0.002	0.059	Cluster1
13	1417831_at	BB156359	structural_maintenance_of_chromosomes_1A	Smc1a	-1.6	0.002	0.002	-1.2	0.209	0.441	Cluster1
14	1449961_at	NM_011286	rabphilin_3A	Rph3a	-2.1	0.002	0.003	-1.3	0.221	0.448	Cluster1
15	1433413_at	AK006863	neurexin_I	Nrxn1	-1.9	0.006	0.008	-1.3	0.285	0.488	Cluster1
16	1422164_at	X66603	POU_domain,_class_3,_transcription_factor_4	Pou3f4	-1.9	0	0	-1.3	0.023	0.19	Cluster1
17	1439083_at	BM239359	Abelson_helper_integration_site_1	Ahi1	-1.7	0.012	0.013	-1.2	0.314	0.504	Cluster1
18	1422533_at	NM_020010	cytochrome_P450,_family_51	Cyp51	-1.6	0	0	-1.2	0	0.021	Cluster1
19	1446193_at	BB175385	---	---	-1.7	0	0	-1.2	0.041	0.245	Cluster1
20	1431024_a_at	AK020165	AT_rich_interactive_domain_4B_(RBP1-like)	Arid4b	-1.9	0.002	0.003	-1.2	0.222	0.449	Cluster1
21	1452722_a_at	BB702110	cullin_5	Cul5	-1.6	0.002	0.004	-1.2	0.231	0.455	Cluster1
22	1417061_at	AF226613	solute_carrier_family_40_(iron-regulated_transporter),_member_1	Slc40a1	-1.6	0	0	-1.2	0.002	0.057	Cluster1
23	1423664_at	BC002107	quinoid_dihydropteridine_reductase	Qdpr	-1.6	0	0	-1.2	0.001	0.037	Cluster1
24	1417862_at	NM_021427	family_with_sequence_similarity_181,_member_B	Fam181b	-1.7	0	0	-1.2	0.004	0.075	Cluster1
25	1447869_x_at	AV047988	Rho-related_BTB_domain_containing_3	Rhobtb3	-1.6	0.012	0.014	-1.1	0.409	0.55	Cluster1
26	1451634_at	BC009123	antisense_Igf2r_RNA	Airn	-1.8	0	0	-1.2	0.017	0.167	Cluster1
27	1436746_at	BI692255	WNK_lysine_deficient_protein_kinase_1	Wnk1	-1.9	0	0.001	-1.2	0.193	0.43	Cluster1
28	1423608_at	BI966443	integral_membrane_protein_2A	Itm2a	-2.5	0	0	-1.5	0	0	Cluster1
29	1450779_at	NM_021272	fatty_acid_binding_protein_7,_brain	Fabp7	-3.1	0	0	-1.6	0	0.009	Cluster1
30	1420946_at	BB825830	alpha_thalassemia/mental_retardation_syndrome_X-linked_homolog_(human)	Atrx	-1.7	0.013	0.015	-1.2	0.274	0.481	Cluster1
31	1456316_a_at	BI965035	acyl-Coenzyme_A_binding_domain_containing_3	Acbd3	-1.6	0.014	0.015	-1.2	0.272	0.481	Cluster1
32	1426458_at	BB473571	sarcolemma_associated_protein	Slmap	-1.6	0.008	0.01	-1.2	0.236	0.459	Cluster1
33	1441353_at	BB093903	neuron_navigator_2	Nav2	-1.6	0	0	-1.2	0.067	0.294	Cluster1
34	1436895_at	BB182934	ArfGAP_with_RhoGAP_domain,_ankyrin_repeat_and_PH_domain_2	Arap2	-1.9	0.001	0.001	-1.3	0.126	0.372	Cluster1
35	1432432_a_at	AK012468	RAB3C,_member_RAS_oncogene_family	Rab3c	-1.6	0	0	-1.2	0.055	0.275	Cluster1
36	1421768_a_at	NM_011982	homer_homolog_1_(Drosophila)	Homer1	-1.6	0.002	0.003	-1.2	0.17	0.411	Cluster1
37	1453414_at	BB133023	yippee-like_2_(Drosophila)	Ypel2	-1.8	0	0.001	-1.3	0.103	0.347	Cluster1
38	1448285_at	NM_009062	regulator_of_G-protein_signaling_4	Rgs4	-1.6	0.003	0.004	-1.2	0.195	0.431	Cluster1
39	1451675_a_at	M63244	aminolevulinic_acid_synthase_2,_erythroid	Alas2	-1.6	0	0	-1.2	0.036	0.232	Cluster1
40	1449494_at	AY026947	RAB3C,_member_RAS_oncogene_family	Rab3c	-1.6	0	0	-1.2	0.075	0.307	Cluster1
41	1423417_at	BI558117	SWI/SNF_related,_matrix_associated,_actin_dependent_regulator_of_chromatin,_subfamily_c,_member_1	Smarcc1	-1.7	0.006	0.007	-1.2	0.233	0.457	Cluster1
42	1449615_s_at	C77256	high_density_lipoprotein_(HDL)_binding_protein	Hdlbp	-1.8	0.012	0.014	-1.3	0.288	0.49	Cluster1
43	1439127_at	BB234919	expressed_sequence_AI314180	AI314180	-1.6	0.001	0.001	-1.2	0.116	0.361	Cluster1
44	1449876_at	NM_011160	protein_kinase,_cGMP-dependent,_type_I	Prkg1	-1.6	0.014	0.015	-1.2	0.282	0.486	Cluster1
45	1435854_at	AW490730	oligodendrocytic_myelin_paranodal_and_inner_loop_protein	Opalin	-3.2	0	0	-1.5	0	0.012	Cluster1
46	1459372_at	AV348246	neuronal_PAS_domain_protein_4	Npas4	-1.6	0.014	0.015	-1.2	0.377	0.535	Cluster1
47	1423594_a_at	BB451714	endothelin_receptor_type_B	Ednrb	-2.4	0	0	-1.3	0.036	0.232	Cluster1
48	1427883_a_at	AW550625	collagen,_type_III,_alpha_1	Col3a1	-1.7	0	0	-1.2	0.022	0.186	Cluster1
49	1451621_at	BC002200	PPPDE_peptidase_domain_containing_1	Pppde1	-1.6	0	0	-1.2	0.116	0.36	Cluster1
50	1430436_at	AV158645	family_with_sequence_similarity_115,_member_A	Fam115a	-1.7	0	0	-1.2	0.125	0.369	Cluster1
51	1460426_at	AI639670	phosphodiesterase_4D_interacting_protein_(myomegalin)	Pde4dip	-1.6	0.001	0.002	-1.2	0.22	0.448	Cluster1
52	1436110_at	BB333485	homer_homolog_2_(Drosophila)	Homer2	-1.6	0.001	0.002	-1.2	0.22	0.448	Cluster1
53	1417963_at	NM_011125	phospholipid_transfer_protein	Pltp	-1.7	0	0	-1.3	0	0.001	Cluster1
54	1425573_a_at	BE943736	ArfGAP_with_SH3_domain,_ankyrin_repeat_and_PH_domain1	Asap1	-1.6	0.003	0.004	-1.3	0.112	0.357	Cluster1
55	1449578_at	AW536705	suppressor_of_Ty_16_homolog_(S._cerevisiae)	Supt16h	-1.7	0.021	0.021	-1.3	0.216	0.446	Cluster1
56	1440248_at	BB238478	cancer_susceptibility_candidate_4	Casc4	-1.6	0.038	0.035	-1.3	0.269	0.478	Cluster1
57	1443256_at	BB548833	predicted_gene_16233	Gm16233	-2	0	0	-1.4	0	0.008	Cluster1
58	1437347_at	BF100813	endothelin_receptor_type_B	Ednrb	-1.8	0	0	-1.3	0	0.006	Cluster1
59	1438565_at	BB464727	RIKEN_cDNA_A830010M20_gene	A830010M20Rik	-1.6	0.016	0.017	-1.2	0.274	0.481	Cluster1
60	1429432_at	BI083627	proline-rich_coiled-coil_2C	Prrc2c	-1.8	0.024	0.024	-1.3	0.307	0.5	Cluster1
61	1456424_s_at	AI591480	phospholipid_transfer_protein	Pltp	-1.8	0	0	-1.3	0	0.011	Cluster1
62	1438269_at	BB278987	zinc_finger_and_BTB_domain_containing_38	Zbtb38	-1.6	0.007	0.008	-1.2	0.167	0.409	Cluster1
63	1449926_at	NM_011617	CD70_antigen	Cd70	-1.6	0	0	-1.3	0.001	0.025	Cluster1
64	1455998_at	BM232738	zinc_finger,_BED_domain_containing_6	Zbed6	-1.6	0.002	0.002	-1.2	0.089	0.327	Cluster1
65	1459984_at	AI552688	melanoma_inhibitory_activity_3	Mia3	-1.7	0.01	0.012	-1.3	0.181	0.421	Cluster1
66	1427486_at	AF157628	protein_tyrosine_phosphatase,_receptor_type,_B	Ptprb	-1.6	0	0	-1.2	0.008	0.118	Cluster1
67	1460250_at	BC021458	sclerostin_domain_containing_1	Sostdc1	-1.6	0	0	-1.2	0.006	0.095	Cluster1
68	1426641_at	BB354684	tribbles_homolog_2_(Drosophila)	Trib2	-1.6	0	0	-1.2	0.001	0.034	Cluster1
69	1419332_at	NM_019397	EGF-like-domain,_multiple_6	Egfl6	-1.7	0	0	-1.3	0.011	0.137	Cluster1
70	1437638_at	BB821417	serine/arginine_repetitive_matrix_2	Srrm2	-1.8	0	0.001	-1.3	0.086	0.323	Cluster1
71	1431191_a_at	AK018163	synaptotagmin_I	Syt1	-1.6	0.01	0.011	-1.2	0.227	0.453	Cluster1
72	1415988_at	BG065877	high_density_lipoprotein_(HDL)_binding_protein	Hdlbp	-1.7	0.014	0.015	-1.2	0.255	0.47	Cluster1
73	1453719_at	AK015714	RIKEN_cDNA_4930506C21_gene	4930506C21Rik	-1.6	0	0	-1.3	0.002	0.056	Cluster1
74	1447227_at	AI504711	---	---	-1.9	0	0	-1.4	0.001	0.029	Cluster1
75	1423607_at	AK014312	lumican	Lum	-1.7	0	0	-1.2	0.001	0.034	Cluster1
76	1443860_at	BE979672	protein_tyrosine_phosphatase,_receptor_type,_D	Ptprd	-1.6	0.001	0.001	-1.2	0.115	0.36	Cluster1
77	1448538_a_at	BE447520	DNA_segment,_Chr_4,_Wayne_State_University_53,_expressed	D4Wsu53e	-2.6	0	0	-1.5	0	0.003	Cluster1
78	1422639_at	NM_054084	calcitonin-related_polypeptide,_beta	Calcb	-2	0	0	-1.3	0.004	0.074	Cluster1
79	1460384_a_at	BC024724	AT_rich_interactive_domain_4B_(RBP1-like)	Arid4b	-1.6	0.002	0.002	-1.2	0.155	0.397	Cluster1
80	1446929_at	BB459664	RIKEN_cDNA_D130062J21_gene	D130062J21Rik	-1.8	0	0	-1.3	0.009	0.125	Cluster1
81	1442100_at	BB619843	inositol_polyphosphate-5-phosphatase_F	Inpp5f	-1.6	0.006	0.008	-1.2	0.249	0.466	Cluster1
82	1449421_a_at	NM_134110	potassium_voltage-gated_channel,_Isk-related_subfamily,_gene_2	Kcne2	-1.8	0	0	-1.2	0.066	0.293	Cluster1
83	1439158_at	BB749708	tousled-like_kinase_1	Tlk1	-1.6	0.026	0.026	-1.2	0.373	0.533	Cluster1
84	1416287_at	NM_009062	regulator_of_G-protein_signaling_4	Rgs4	-1.6	0.001	0.001	-1.2	0.144	0.388	Cluster1
85	1443412_s_at	BB431535	matrix_metallopeptidase_16	Mmp16	-1.6	0	0.001	-1.2	0.116	0.36	Cluster1
86	1448945_at	BC024534	plasma_membrane_proteolipid	Pllp	-1.9	0	0	-1.3	0	0	Cluster1
87	1420847_a_at	NM_010207	fibroblast_growth_factor_receptor_2	Fgfr2	-1.6	0	0	-1.2	0	0.017	Cluster1
88	1423995_at	BQ175246	kinesin_family_member_1B	Kif1b	-1.6	0.023	0.023	-1.2	0.269	0.478	Cluster1
89	1416211_a_at	BC002064	pleiotrophin	Ptn	-1.6	0	0	-1.3	0.001	0.029	Cluster1
90	1433652_at	AV245981	immunoglobulin_superfamily,_member_1	Igsf1	-1.9	0	0	-1.4	0.001	0.034	Cluster1
91	1449340_at	BC021458	sclerostin_domain_containing_1	Sostdc1	-2	0	0	-1.4	0	0.015	Cluster1
92	1437224_at	BE988775	reticulon_4	Rtn4	-1.6	0.004	0.005	-1.3	0.124	0.368	Cluster1
93	1440293_at	BB821275	RIKEN_cDNA_C230081A13_gene	C230081A13Rik	-1.7	0.01	0.012	-1.3	0.18	0.42	Cluster1
94	1442368_at	BB667457	potassium_channel_tetramerisation_domain_containing_12b	Kctd12b	-1.6	0.005	0.006	-1.2	0.135	0.379	Cluster1
95	1442775_at	AI481700	---	---	-1.7	0	0	-1.2	0.003	0.073	Cluster1
96	1456102_a_at	BB257147	cullin_5	Cul5	-1.6	0.002	0.003	-1.2	0.188	0.426	Cluster1
97	1417677_at	NM_010098	opsin_3	Opn3	-1.6	0	0	-1.2	0.002	0.049	Cluster1
98	1437657_at	AV319713	S_phase_cyclin_A-associated_protein_in_the_ER	Scaper	-1.6	0	0.001	-1.2	0.104	0.347	Cluster1
99	1459371_at	BB458938	---	---	-1.6	0	0	-1.2	0.04	0.241	Cluster1
100	1455836_at	BM230222	poly_(A)_polymerase_alpha	Papola	-1.8	0.004	0.005	-1.2	0.221	0.448	Cluster1
101	1459388_at	BB257461	---	---	-1.6	0	0	-1.2	0.017	0.163	Cluster1
102	1444920_at	BG069269	---	---	-1.8	0	0	-1.2	0.061	0.285	Cluster1
103	1456781_at	AW121365	---	---	-1.7	0	0	-1.2	0.006	0.099	Cluster1
104	1446550_at	BB162021	G1_to_S_phase_transition_1	Gspt1	-1.6	0	0	-1.2	0.017	0.166	Cluster1
105	1430177_at	AK011961	ubiquitin-conjugating_enzyme_E2B	Ube2b	-1.6	0	0	-1.2	0.052	0.269	Cluster1
106	1440106_at	BB469805	---	---	-1.6	0	0.001	-1.2	0.161	0.403	Cluster1
107	1425600_a_at	AW049748	phospholipase_C,_beta_1	Plcb1	-1.8	0.006	0.007	-1.2	0.319	0.507	Cluster1
108	1441063_at	BB229155	eukaryotic_translation_initiation_factor_2C,_3	Eif2c3	-1.6	0	0	-1.2	0.083	0.319	Cluster1
109	1458539_at	BB462088	R3H_domain_1_(binds_single-stranded_nucleic_acids)	R3hdm1	-2.6	0	0.001	-1.4	0.137	0.381	Cluster1
110	1430971_a_at	AK020468	aquarius	Aqr	-1.6	0	0	-1.2	0.093	0.333	Cluster1
111	1453612_at	AV254337	NIMA_(never_in_mitosis_gene_a)-related_expressed_kinase_1	Nek1	-1.7	0.006	0.007	-1.2	0.276	0.483	Cluster1
112	1451878_a_at	BC020052	junction-mediating_and_regulatory_protein	Jmy	-1.7	0.008	0.01	-1.2	0.299	0.496	Cluster1
113	1436404_at	BM119088	TLC_domain_containing_1	Tlcd1	-1.6	0	0	-1.2	0.014	0.153	Cluster1
114	1441531_at	BB143801	phospholipase_C,_beta_4	Plcb4	-1.8	0	0	-1.2	0.054	0.272	Cluster1
115	1427822_a_at	U20265	coatomer_protein_complex,_subunit_gamma_2,_antisense_2	Copg2as2	-1.9	0.013	0.014	-1.2	0.39	0.541	Cluster1
116	1420356_at	NM_016718	ninjurin_2	Ninj2	-1.9	0	0	-1.2	0.002	0.06	Cluster1
117	1418395_at	NM_026183	solute_carrier_family_47,_member_1	Slc47a1	-2.3	0	0	-1.3	0.046	0.256	Cluster1
118	1419256_at	BM213516	spectrin_beta_2	Spnb2	-1.7	0.004	0.006	-1.2	0.321	0.507	Cluster1
119	1448982_at	NM_011177	kallikrein_related-peptidase_6	Klk6	-2.2	0	0	-1.3	0.005	0.095	Cluster1
120	1433489_s_at	BG873440	fibroblast_growth_factor_receptor_2	Fgfr2	-1.7	0	0	-1.2	0.002	0.054	Cluster1
121	1452470_at	BC019716	centrosomal_protein_350	Cep350	-1.7	0.001	0.002	-1.2	0.254	0.469	Cluster1
122	1444848_at	BG064052	---	---	-1.7	0	0	-1.2	0.003	0.064	Cluster1
123	1439376_x_at	BB357590	cyclin_D_binding_myb-like_transcription_factor_1	Dmtf1	-1.6	0	0	-1.2	0.123	0.368	Cluster1
124	1420941_at	BF585144	regulator_of_G-protein_signaling_5	Rgs5	-1.9	0	0.001	-1.2	0.144	0.387	Cluster1
125	1455799_at	BB751387	RAR-related_orphan_receptor_beta	Rorb	-1.6	0.001	0.002	-1.2	0.244	0.464	Cluster1
126	1456337_at	AV291818	ArfGAP_with_RhoGAP_domain,_ankyrin_repeat_and_PH_domain_2	Arap2	-1.8	0.001	0.002	-1.2	0.242	0.463	Cluster1
127	1442512_at	BB831345	CDC42_effector_protein_(Rho_GTPase_binding)_1	Cdc42ep1	-1.6	0	0	-1.2	0.004	0.084	Cluster1
128	1429040_at	BE692399	cadherin_11_pseudogene	6820431F20Rik	-1.6	0.004	0.006	-1.2	0.316	0.505	Cluster1
129	1422733_at	AV230815	four_jointed_box_1_(Drosophila)	Fjx1	-1.6	0	0	-1.4	0.005	0.085	Cluster1
130	1425272_at	AF083876	epithelial_membrane_protein_2	Emp2	-1.6	0	0.001	-1.3	0.018	0.168	Cluster1
131	1416966_at	BC014762	solute_carrier_family_22_(organic_anion_transporter),_member_8	Slc22a8	-1.7	0	0	-1.4	0	0.003	Cluster1
132	1438532_at	BB024475	hemicentin_1	Hmcn1	-1.6	0	0	-1.4	0	0.011	Cluster1
133	1444228_s_at	BB333568	hect_(homologous_to_the_E6-AP_(UBE3A)_carboxyl_terminus)_domain_and_RCC1_(CHC1)-like_domain_(RLD)_2	Herc2	-1.6	0.009	0.01	-1.3	0.065	0.291	Cluster1
134	1416342_at	NM_011607	tenascin_C	Tnc	-1.6	0	0	-1.4	0	0.004	Cluster1
135	1418687_at	NM_018790	activity_regulated_cytoskeletal-associated_protein	Arc	-2.6	0	0	-1.8	0.001	0.038	Cluster1
136	1446176_at	BB425852	---	---	-1.8	0.001	0.002	-1.5	0.019	0.174	Cluster1
137	1424945_at	AF321853	chordin-like_1	Chrdl1	-1.7	0	0	-1.3	0	0.019	Cluster1
138	1437118_at	C77542	ubiquitin_specific_peptidase_7	Usp7	-1.6	0.034	0.032	-1.3	0.216	0.446	Cluster1
139	1453276_at	AK020905	kinesin_family_member_13B	Kif13b	-1.6	0	0	-1.3	0.018	0.171	Cluster1
140	1433047_at	AK019920	RIKEN_cDNA_5330430B06_gene	5330430B06Rik	-1.7	0.002	0.002	-1.3	0.06	0.283	Cluster1
141	1435172_at	BB128925	eomesodermin_homolog_(Xenopus_laevis)	Eomes	-1.8	0	0	-1.9	0	0.006	Cluster1
142	1427682_a_at	X06746	early_growth_response_2	Egr2	-1.9	0.005	0.006	-1.9	0.003	0.068	Cluster1
143	1418304_at	NM_130878	cadherin-related_family_member_1	Cdhr1	-1.7	0.006	0.007	-2	0.001	0.033	Cluster1
144	1416505_at	NM_010444	nuclear_receptor_subfamily_4,_group_A,_member_1	Nr4a1	-1.5	0.003	0.005	-1.7	0	0.008	Cluster1
145	1449927_at	NM_011312	S100_calcium_binding_protein_A5	S100a5	-1.9	0.012	0.014	-2.5	0.001	0.034	Cluster1
146	1450707_at	NM_021791	double_C2,_gamma	Doc2g	-1.4	0.011	0.013	-1.6	0.001	0.039	Cluster1
147	1430823_at	BE335894	RIKEN_cDNA_2700029L08_gene	2700029L08Rik	-1.7	0	0	-1.2	0.073	0.303	Cluster2
148	1436892_at	BB133520	sprouty-related,_EVH1_domain_containing_2	Spred2	-2	0	0.001	-1.2	0.219	0.447	Cluster2
149	1422890_at	BM218630	protocadherin_18	Pcdh18	-1.9	0	0	-1.2	0.022	0.187	Cluster2
150	1426640_s_at	BB354684	tribbles_homolog_2_(Drosophila)	Trib2	-1.8	0	0	-1.2	0	0.006	Cluster2
151	1444306_at	BB462562	Musashi_homolog_1(Drosophila)	Msi1	-1.7	0	0	-1.2	0.031	0.219	Cluster2
152	1425339_at	BB224034	phospholipase_C,_beta_4	Plcb4	-1.6	0	0	-1.2	0.191	0.428	Cluster2
153	1428303_at	AK005160	BTB_(POZ)_domain_containing_17	Btbd17	-1.9	0	0	-1.2	0.009	0.12	Cluster2
154	1436098_at	BB667452	butyrylcholinesterase	Bche	-2	0	0	-1.2	0.001	0.037	Cluster2
155	1423325_at	AV135835	pinin	Pnn	-1.7	0.004	0.005	-1.2	0.356	0.525	Cluster2
156	1425725_s_at	BF136532	protein_phosphatase_2,_regulatory_subunit_B_(B56),_gamma_isoform	Ppp2r5c	-1.6	0	0	-1.1	0.081	0.316	Cluster2
157	1427311_at	BB380312	bromodomain_PHD_finger_transcription_factor	Bptf	-1.9	0.001	0.002	-1.2	0.289	0.49	Cluster2
158	1423214_at	BB476707	plexin_C1	Plxnc1	-1.8	0.001	0.001	-1.2	0.275	0.482	Cluster2
159	1459804_at	BB475090	CREB_binding_protein	Crebbp	-1.8	0.001	0.002	-1.2	0.312	0.502	Cluster2
160	1429169_at	AK011224	predicted_gene_15453_///_RNA_binding_motif_protein_3	Gm15453_///_Rbm3	-7	0	0	-1.2	0.011	0.132	Cluster2
161	1460278_a_at	NM_134095	PPPDE_peptidase_domain_containing_2	Pppde2	-1.7	0	0	-1.1	0.178	0.419	Cluster2
162	1435912_at	BM220232	UBX_domain_protein_7	Ubxn7	-1.6	0	0	-1.1	0.157	0.4	Cluster2
163	1429897_a_at	AK009258	DNA_segment,_Chr_16,_ERATO_Doi_472,_expressed	D16Ertd472e	-1.9	0	0	-1.1	0.302	0.497	Cluster2
164	1444724_at	AW492836	---	---	-1.6	0	0	-1.1	0.492	0.582	Cluster2
165	1460729_at	BI662863	Rho-associated_coiled-coil_containing_protein_kinase_1	Rock1	-1.6	0.001	0.001	-1.1	0.658	0.64	Cluster2
166	1443640_at	BB831078	zinc_finger_protein_882	Zfp882	-2	0	0	-1.1	0.548	0.602	Cluster2
167	1458811_at	BB462600	RIKEN_cDNA_9430047L24_gene	9430047L24Rik	-1.8	0	0	-1.1	0.646	0.636	Cluster2
168	1436056_at	BB767898	kinesin_family_member_13B	Kif13b	-1.6	0	0	-1.1	0.008	0.116	Cluster2
169	1442009_at	BB357250	eukaryotic_translation_initiation_factor_2C,_3	Eif2c3	-1.7	0	0.001	-1.1	0.278	0.484	Cluster2
170	1457336_at	BB528672	R3H_domain_1_(binds_single-stranded_nucleic_acids)	R3hdm1	-1.8	0	0	-1.2	0.061	0.285	Cluster2
171	1427488_a_at	BC026990	baculoviral_IAP_repeat-containing_6	Birc6	-1.6	0.022	0.022	-1.1	0.552	0.604	Cluster2
172	1422889_at	BM218630	protocadherin_18	Pcdh18	-1.6	0	0	-1.1	0.043	0.249	Cluster2
173	1425575_at	M68513	Eph_receptor_A3	Epha3	-1.6	0	0	-1.1	0.136	0.38	Cluster2
174	1452834_at	AK011178	proline_rich_5_like	Prr5l	-1.6	0	0	-1.1	0.037	0.233	Cluster2
175	1416318_at	AF426024	serine_(or_cysteine)_peptidase_inhibitor,_clade_B,_member_1a	Serpinb1a	-3.3	0	0	-1.4	0	0.017	Cluster2
176	1454784_at	AV340742	heparan_sulfate_(glucosamine)_3-O-sulfotransferase_2	Hs3st2	-1.6	0	0	-1.1	0.032	0.222	Cluster2
177	1421866_at	NM_008173	nuclear_receptor_subfamily_3,_group_C,_member_1	Nr3c1	-2.2	0	0	-1.2	0.22	0.448	Cluster2
178	1423413_at	AI987929	N-myc_downstream_regulated_gene_1	Ndrg1	-1.8	0.001	0.002	-1.1	0.404	0.548	Cluster2
179	1444676_at	BB205578	---	---	-1.6	0	0.001	-1.1	0.372	0.532	Cluster2
180	1456650_at	BB150912	---	---	-1.6	0	0	-1.1	0.045	0.253	Cluster2
181	1434301_at	BE303700	family_with_sequence_similarity_84,_member_B	Fam84b	-1.7	0	0	-1.1	0.047	0.258	Cluster2
182	1444058_at	BM231657	DAZ_interacting_protein_3,_zinc_finger	Dzip3	-1.6	0	0.001	-1.1	0.446	0.565	Cluster2
183	1423146_at	AV337579	hairy_and_enhancer_of_split_5_(Drosophila)	Hes5	-3.1	0	0	-1.3	0.001	0.031	Cluster2
184	1416455_a_at	NM_009964	crystallin,_alpha_B	Cryab	-2.7	0	0	-1.2	0.015	0.157	Cluster2
185	1422680_at	BB459423	Ctr9,_Paf1/RNA_polymerase_II_complex_component,_homolog_(S._cerevisiae)	Ctr9	-1.6	0	0	-1.1	0.24	0.461	Cluster2
186	1438721_a_at	BB668007	interferon_regulatory_factor_3	Irf3	-1.6	0	0	-1.1	0.238	0.46	Cluster2
187	1423184_at	AI326108	intersectin_2	Itsn2	-1.6	0.012	0.014	-1.1	0.555	0.605	Cluster2
188	1439632_at	BQ174397	guanine_nucleotide_binding_protein_(G_protein),_beta_4	Gnb4	-1.7	0	0	-1.1	0.005	0.088	Cluster2
189	1439650_at	BG072267	reticulon_4	Rtn4	-1.8	0	0	-1.1	0.102	0.345	Cluster2
190	1439554_at	AV323498	sex_comb_on_midleg_homolog_1	Scmh1	-1.7	0	0.001	-1.1	0.429	0.559	Cluster2
191	1452968_at	AK003674	collagen_triple_helix_repeat_containing_1	Cthrc1	-1.7	0	0	-1.1	0.014	0.151	Cluster2
192	1437892_at	BQ084812	zinc_finger_with_KRAB_and_SCAN_domains_3	Zkscan3	-1.6	0	0	-1.1	0.247	0.465	Cluster2
193	1441522_at	BB083931	DCN1,_defective_in_cullin_neddylation_1,_domain_containing_2_(S._cerevisiae)	Dcun1d2	-2	0	0	-1.1	0.043	0.249	Cluster2
194	1425597_a_at	AW060288	quaking	Qk	-2.2	0	0	-1.2	0.295	0.494	Cluster2
195	1436387_at	BB398124	RIKEN_cDNA_C330006P03_gene_///_homer_homolog_1_(Drosophila)	C330006P03Rik_///_Homer1	-2.2	0.008	0.01	-1.1	0.603	0.622	Cluster2
196	1439640_at	AV381105	---	---	-1.8	0	0	-1.1	0.045	0.254	Cluster2
197	1433155_at	AK020986	RIKEN_cDNA_B230204H03_gene	B230204H03Rik	-2.1	0	0	-1.1	0.061	0.284	Cluster2
198	1422834_at	BB051684	potassium_voltage-gated_channel,_Shal-related_family,_member_2	Kcnd2	-1.8	0	0	-1.1	0.363	0.529	Cluster2
199	1438100_at	BB021749	RAB,_member_of_RAS_oncogene_family-like_6	Rabl6	-1.8	0	0	-1.1	0.244	0.464	Cluster2
200	1426300_at	U95030	activated_leukocyte_cell_adhesion_molecule	Alcam	-1.6	0	0	-1.1	0.304	0.498	Cluster2
201	1427685_a_at	AF041858	synaptojanin_2	Synj2	-1.7	0	0	-1.1	0.083	0.319	Cluster2
202	1436343_at	BM502696	chromodomain_helicase_DNA_binding_protein_4	Chd4	-1.6	0.001	0.002	-1.1	0.604	0.622	Cluster2
203	1458050_at	BB243259	---	---	-2.3	0	0	-1.1	0.213	0.444	Cluster2
204	1450093_s_at	NM_010731	zinc_finger_and_BTB_domain_containing_7a	Zbtb7a	-1.6	0.001	0.002	-1.1	0.602	0.622	Cluster2
205	1422165_at	X66603	POU_domain,_class_3,_transcription_factor_4	Pou3f4	-1.7	0	0	-1.1	0.2	0.435	Cluster2
206	1417792_at	BM238431	zinc_finger,_matrin-like	Zfml	-1.8	0	0	-1.1	0.428	0.558	Cluster2
207	1457344_at	BB348893	neuropilin_(NRP)_and_tolloid_(TLL)-like_2	Neto2	-1.8	0	0	-1.1	0.091	0.33	Cluster2
208	1444562_at	BE690666	---	---	-1.6	0	0	-1.1	0.321	0.507	Cluster2
209	1452187_at	BB541007	RNA_binding_motif_protein_5	Rbm5	-2.1	0	0	-1.1	0.478	0.577	Cluster2
210	1426124_a_at	U21209	CDC-like_kinase_1	Clk1	-1.6	0	0	-1.1	0.208	0.44	Cluster2
211	1428750_at	BF453885	CDC42_effector_protein_(Rho_GTPase_binding)_2	Cdc42ep2	-1.6	0	0	-1.1	0.012	0.139	Cluster2
212	1419662_at	BB542051	osteoglycin	Ogn	-1.9	0	0	-1.1	0.112	0.357	Cluster2
213	1419633_at	NM_013702	UNC_homeobox	Uncx	-1.8	0	0	-1.1	0.091	0.33	Cluster2
214	1446798_at	BB129632	Mitogen-activated_protein_kinase_kinase_kinase_kinase_3	Map4k3	-1.6	0.001	0.001	-1.1	0.399	0.546	Cluster2
215	1437086_at	BB425719	achaete-scute_complex_homolog_1_(Drosophila)	Ascl1	-1.6	0	0	-1.1	0.246	0.465	Cluster2
216	1452479_at	BB309153	coatomer_protein_complex,_subunit_gamma_2,_antisense_2	Copg2as2	-1.7	0.004	0.005	-1.1	0.52	0.592	Cluster2
217	1438031_at	BB042252	RAS,_guanyl_releasing_protein_3	Rasgrp3	-1.6	0	0	-1.1	0.16	0.402	Cluster2
218	1451287_s_at	BC024599	allograft_inflammatory_factor_1-like	Aif1l	-1.7	0	0	-1.1	0.139	0.383	Cluster2
219	1418252_at	NM_008812	peptidyl_arginine_deiminase,_type_II	Padi2	-1.8	0	0	-1.1	0.036	0.231	Cluster2
220	1418599_at	NM_007729	collagen,_type_XI,_alpha_1	Col11a1	-1.6	0	0	-1.1	0.214	0.444	Cluster2
221	1442880_at	AV319882	---	---	-1.6	0	0	-1.1	0.157	0.4	Cluster2
222	1416355_at	NM_011252	RNA_binding_motif_protein,_X_chromosome	Rbmx	-3.1	0	0	-1.2	0.035	0.228	Cluster2
223	1421508_at	NM_011855	odd_Oz/ten-m_homolog_1_(Drosophila)	Odz1	-1.6	0.001	0.002	-1.1	0.555	0.605	Cluster2
224	1422231_a_at	AF329969	tumor_necrosis_factor_receptor_superfamily,_member_25	Tnfrsf25	-2.2	0	0	-1.1	0.061	0.285	Cluster2
225	1437581_at	AW824355	zinc_finger_protein_800	Zfp800	-2.1	0.002	0.003	-1.1	0.523	0.593	Cluster2
226	1439938_at	BE686007	serine/threonine_kinase_38	Stk38	-1.7	0	0	-1.1	0.052	0.269	Cluster2
227	1441648_at	BM115522	C1q_and_tumor_necrosis_factor_related_protein_4	C1qtnf4	-2	0	0	-1.2	0.177	0.418	Cluster2
228	1438651_a_at	BB483357	apelin_receptor	Aplnr	-1.6	0	0	-1.1	0.332	0.513	Cluster2
229	1446090_at	BB521597	---	---	-1.8	0	0	-1.1	0.075	0.307	Cluster2
230	1458147_at	BB465982	---	---	-1.6	0.009	0.011	-1.1	0.733	0.659	Cluster2
231	1418310_a_at	NM_020599	retinaldehyde_binding_protein_1	Rlbp1	-1.7	0	0	-1.1	0.107	0.351	Cluster2
232	1419663_at	BB542051	osteoglycin	Ogn	-1.8	0	0	-1.1	0.33	0.512	Cluster2
233	1455965_at	BG064671	a_disintegrin-like_and_metallopeptidase_(reprolysin_type)_with_thrombospondin_type_1_motif,_4	Adamts4	-1.7	0	0	-1.1	0.147	0.39	Cluster2
234	1458536_at	BB097972	---	---	-1.7	0	0	-1.1	0.238	0.46	Cluster2
235	1419186_a_at	NM_009183	ST8_alpha-N-acetyl-neuraminide_alpha-2,8-sialyltransferase_4	St8sia4	-1.7	0	0	-1.1	0.209	0.441	Cluster2
236	1416967_at	U31967	SRY-box_containing_gene_2	Sox2	-1.6	0	0	-1	0.317	0.505	Cluster2
237	1457361_at	BB628626	zinc_finger_protein_804A	Zfp804a	-1.7	0	0	-1.1	0.538	0.599	Cluster2
238	1426412_at	BM116592	neurogenic_differentiation_1	Neurod1	-1.7	0.018	0.019	-1.1	0.797	0.676	Cluster2
239	1431394_a_at	AK014938	leucine-rich_repeat_kinase_2	Lrrk2	-1.6	0	0	-1	0.484	0.579	Cluster2
240	1450904_at	BQ174163	transmembrane_protein_167	Tmem167	-1.6	0	0	-1	0.438	0.563	Cluster2
241	1448922_at	NM_024438	dual_specificity_phosphatase_19	Dusp19	-1.6	0	0	-1	0.333	0.514	Cluster2
242	1456010_x_at	BB561515	hairy_and_enhancer_of_split_5_(Drosophila)	Hes5	-3.2	0	0	-1.2	0	0.019	Cluster2
243	1418876_at	BB662927	forkhead_box_D1	Foxd1	-1.8	0	0	-1.1	0.188	0.426	Cluster2
244	1438892_at	BB088198	diabetic_embryopathy_1	Dep1	-2.4	0	0	-1.1	0.215	0.446	Cluster2
245	1438236_at	BB485864	nuclear_factor_I/A	Nfia	-2.1	0	0	-1.1	0.466	0.572	Cluster2
246	1416200_at	NM_133775	interleukin_33	Il33	-2.2	0	0	-1.2	0.014	0.152	Cluster2
247	1448606_at	U70622	lysophosphatidic_acid_receptor_1	Lpar1	-2.6	0	0	-1.2	0.023	0.189	Cluster2
248	1451440_at	AF311699	chondrolectin	Chodl	-1.6	0	0	-1.1	0.128	0.374	Cluster2
249	1423340_at	AV334599	transcription_factor_AP-2_beta	Tfap2b	-1.6	0	0	-1.1	0.266	0.476	Cluster2
250	1428804_at	AK017269	microfibrillar-associated_protein_3-like	Mfap3l	-1.6	0	0	-1.1	0.045	0.254	Cluster2
251	1452594_at	BB004080	dual_specificity_phosphatase_11_(RNA/RNP_complex_1-interacting)	Dusp11	-1.7	0	0	-1.1	0.11	0.355	Cluster2
252	1447853_x_at	BB040841	Kinesin_family_member_13A	Kif13a	-1.6	0	0	-1.1	0.475	0.576	Cluster2
253	1456402_at	BB130348	RIKEN_cDNA_A330076H08_gene	A330076H08Rik	-1.7	0	0.001	-1.1	0.509	0.589	Cluster2
254	1416118_at	NM_025863	tripartite_motif-containing_59	Trim59	-1.6	0	0	-1.1	0.338	0.516	Cluster2
255	1428721_at	AK014466	kelch-like_28_(Drosophila)	Klhl28	-1.6	0	0	-1.1	0.242	0.463	Cluster2
256	1437996_s_at	BB131676	canopy_1_homolog_(zebrafish)	Cnpy1	-2.3	0.023	0.023	-1.1	0.699	0.65	Cluster2
257	1447863_s_at	BB322941	nuclear_receptor_subfamily_4,_group_A,_member_2	Nr4a2	-1.8	0	0	-1.1	0.293	0.492	Cluster2
258	1451569_at	AU066920	nuclear_receptor_subfamily_2,_group_C,_member_2	Nr2c2	-1.6	0.013	0.014	-1.1	0.636	0.633	Cluster2
259	1457142_at	BB667731	N-terminal_EF-hand_calcium_binding_protein_1	Necab1	-1.8	0.002	0.003	-1.1	0.543	0.601	Cluster2
260	1439342_at	AV353028	Caseinolytic_peptidase_X_(E.coli)	Clpx	-1.7	0	0	-1.1	0.053	0.27	Cluster2
261	1443919_at	BB306111	proline-rich_transmembrane_protein_3	Prrt3	-2.1	0	0	-1.1	0.113	0.357	Cluster2
262	1439501_at	BM233760	mitochondrial_calcium_uptake_1	Micu1	-1.8	0	0	-1.1	0.244	0.464	Cluster2
263	1427553_at	BC026389	predicted_gene_16489	Gm16489	-1.6	0	0	-1.1	0.353	0.525	Cluster2
264	1433032_at	AK013751	RIKEN_cDNA_2900064K03_gene	2900064K03Rik	-1.7	0	0	-1.1	0.464	0.572	Cluster2
265	1456833_at	BB353220	G_protein-coupled_receptor_17	Gpr17	-2.7	0	0	-1.1	0.21	0.442	Cluster2
266	1459377_at	BB298284	paralemmin_2	Palm2	-1.6	0.002	0.003	-1.1	0.623	0.628	Cluster2
267	1417143_at	U70622	lysophosphatidic_acid_receptor_1	Lpar1	-2.6	0	0	-1.1	0.024	0.193	Cluster2
268	1455336_at	BG073155	THAP_domain_containing,_apoptosis_associated_protein_2	Thap2	-2.1	0	0	-1.1	0.185	0.425	Cluster2
269	1444141_at	BB828008	sorting_nexin_13	Snx13	-1.6	0.001	0.002	-1.1	0.677	0.645	Cluster2
270	1445618_at	BE852889	---	---	-1.6	0	0	-1.1	0.148	0.391	Cluster2
271	1440227_at	AV245536	solute_carrier_family_5_(inositol_transporters),_member_3	Slc5a3	-1.9	0	0	-1.1	0.478	0.577	Cluster2
272	1425079_at	BC024498	transmembrane_6_superfamily_member_2	Tm6sf2	-2	0	0	-1.1	0.203	0.437	Cluster2
273	1426301_at	U95030	activated_leukocyte_cell_adhesion_molecule	Alcam	-1.6	0	0	-1.1	0.494	0.583	Cluster2
274	1439869_at	BB326106	zinc_finger_protein_493	Zfp493	-1.6	0	0	-1.1	0.306	0.499	Cluster2
275	1447807_s_at	AV336001	pleckstrin_homology_domain_containing,_family_H_(with_MyTH4_domain)_member_1	Plekhh1	-1.6	0	0	-1.1	0.142	0.386	Cluster2
276	1435583_at	AU067633	---	---	-1.8	0	0	-1.1	0.237	0.459	Cluster2
277	1428760_at	AW537061	small_nuclear_RNA_activating_complex,_polypeptide_3	Snapc3	-1.7	0	0	-1.1	0.192	0.429	Cluster2
278	1455396_at	BF451402	ATPase,_class_I,_type_8B,_member_1	Atp8b1	-1.6	0	0	-1	0.456	0.569	Cluster2
279	1460538_at	AK021064	cadherin_10	Cdh10	-1.7	0	0	-1.1	0.513	0.59	Cluster2
280	1459288_at	BB472451	---	---	-1.7	0	0	-1	0.618	0.627	Cluster2
281	1435284_at	BB648600	reticulon_4	Rtn4	-1.7	0	0	-1.1	0.016	0.162	Cluster2
282	1445870_at	BB367621	---	---	-1.7	0	0	-1.1	0.146	0.389	Cluster2
283	1446188_at	BB363453	centrosomal_protein_97	Cep97	-1.6	0	0	-1.1	0.114	0.359	Cluster2
284	1453791_at	BB648310	RIKEN_cDNA_C130071C03_gene	C130071C03Rik	-2	0	0	-1.1	0.377	0.535	Cluster2
285	1435642_at	BB081437	proline_rich_region_18	Prr18	-2	0	0	-1.1	0.113	0.357	Cluster2
286	1429158_at	AV302798	F-box_protein_28	Fbxo28	-1.7	0	0	-1.1	0.2	0.435	Cluster2
287	1423331_a_at	BG070704	poliovirus_receptor-related_3	Pvrl3	-1.9	0	0	-1.1	0.269	0.479	Cluster2
288	1437158_at	BG070859	Nipped-B_homolog_(Drosophila)	Nipbl	-1.6	0.001	0.001	-1.1	0.628	0.63	Cluster2
289	1436115_at	BB829749	predicted_gene_266	Gm266	-2.6	0	0	-1.2	0.001	0.042	Cluster2
290	1426110_a_at	U48235	lysophosphatidic_acid_receptor_1	Lpar1	-2.4	0	0	-1.2	0.02	0.178	Cluster2
291	1443128_at	BB522781	integrator_complex_subunit_6	Ints6	-1.6	0	0	-1.1	0.021	0.185	Cluster2
292	1454200_at	AK012377	zinc_finger_E-box_binding_homeobox_2	Zeb2	-1.7	0	0	-1.1	0.141	0.384	Cluster2
293	1436382_at	BB045268	zinc_finger_and_BTB_domain_containing_12	Zbtb12	-1.6	0	0	-1.1	0.112	0.357	Cluster2
294	1459464_at	BG069189	---	---	-1.6	0	0	-1.1	0.131	0.376	Cluster2
295	1417714_x_at	NM_008218	hemoglobin_alpha,_adult_chain_1_///_hemoglobin_alpha,_adult_chain_2	Hba-a1_///_Hba-a2	-18.5	0	0	-1.9	0.011	0.132	Cluster2
296	1453391_at	AK016255	spermatogenesis_associated_glutamate_(E)-rich_protein_7,_pseudogene_1_///_spermatogenesis_associated_glutamate_(E)-rich_protein_8,_pseudogene_1	Speer7-ps1_///_Speer8-ps1	-1.6	0	0	-1.1	0.158	0.401	Cluster2
297	1420402_at	NM_009723	ATPase,_Ca++_transporting,_plasma_membrane_2	Atp2b2	-1.7	0.003	0.004	-1.1	0.477	0.577	Cluster2
298	1439940_at	AV328280	solute_carrier_family_1_(glial_high_affinity_glutamate_transporter),_member_2	Slc1a2	-1.6	0.018	0.019	-1.1	0.585	0.616	Cluster2
299	1457458_at	BG076273	zinc_finger_CCCH-type_containing_4	Zc3h4	-1.6	0	0	-1.1	0.315	0.504	Cluster2
300	1427305_at	AV340508	phosphatidylinositol_glycan_anchor_biosynthesis,_class_A	Piga	-1.7	0	0	-1.1	0.035	0.23	Cluster2
301	1440146_at	BB829606	vacuolar_protein_sorting_13A_(yeast)	Vps13a	-1.9	0.002	0.002	-1.1	0.453	0.568	Cluster2
302	1455182_at	AV104668	kinesin_family_member_1B	Kif1b	-1.8	0	0	-1.1	0.118	0.362	Cluster2
303	1425467_a_at	BB768495	proteolipid_protein_(myelin)_1	Plp1	-2.4	0	0	-1.2	0.155	0.398	Cluster2
304	1421738_at	NM_008066	gamma-aminobutyric_acid_(GABA)_A_receptor,_subunit_alpha_2	Gabra2	-2	0	0	-1.1	0.257	0.471	Cluster2
305	1430511_at	AK005367	unc-13_homolog_C_(C._elegans)	Unc13c	-1.6	0	0	-1.1	0.354	0.525	Cluster2
306	1438051_at	AV325874	tetratricopeptide_repeat_domain_14	Ttc14	-1.7	0.001	0.001	-1.1	0.431	0.56	Cluster2
307	1451835_at	AY069926	SRY-box_containing_gene_21	Sox21	-2	0	0	-1.2	0.001	0.03	Cluster2
308	1416474_at	NM_020043	immunoglobulin_superfamily,_DCC_subclass,_member_4	Igdcc4	-1.7	0	0	-1.1	0.004	0.08	Cluster2
309	1457637_at	BE992966	---	---	-1.7	0.001	0.001	-1.1	0.471	0.574	Cluster2
310	1446990_at	AW556192	nuclear_factor_I/A	Nfia	-1.7	0	0	-1.1	0.233	0.457	Cluster2
311	1425526_a_at	L06502	paired_related_homeobox_1	Prrx1	-1.8	0	0	-1.1	0.153	0.396	Cluster2
312	1454655_at	BB094429	diacylglycerol_kinase,_delta	Dgkd	-1.8	0.008	0.01	-1.1	0.499	0.585	Cluster2
313	1440339_at	AW910504	ectonucleotide_pyrophosphatase/phosphodiesterase_1	Enpp1	-2.5	0	0	-1.2	0.002	0.055	Cluster2
314	1427037_at	BF227830	eukaryotic_translation_initiation_factor_4,_gamma_1	Eif4g1	-1.6	0.012	0.014	-1.1	0.551	0.603	Cluster2
315	1455471_at	AV333862	canopy_1_homolog_(zebrafish)	Cnpy1	-1.8	0.055	0.047	-1.1	0.659	0.64	Cluster2
316	1440001_at	BM116147	RNA_imprinted_and_accumulated_in_nucleus	Rian	-1.6	0	0	-1.1	0.145	0.388	Cluster2
317	1428361_x_at	AK011116	hemoglobin_alpha,_adult_chain_1_///_hemoglobin_alpha,_adult_chain_2	Hba-a1_///_Hba-a2	-28.6	0	0	-1.8	0.01	0.125	Cluster2
318	1448352_at	BB705823	leucine_zipper_protein_1	Luzp1	-1.8	0.002	0.003	-1.1	0.541	0.6	Cluster2
319	1436875_at	BB130476	dynamin_3	Dnm3	-1.6	0.018	0.019	-1.1	0.662	0.641	Cluster2
320	1453165_at	BB701076	methyltransferase_like_4	Mettl4	-1.8	0	0	-1.1	0.149	0.392	Cluster2
321	1436356_at	AW107196	sterile_alpha_motif_domain_containing_4	Samd4	-1.7	0	0	-1.1	0.301	0.497	Cluster2
322	1451660_a_at	BC016893	homeobox_B6	Hoxb6	-1.6	0	0.001	-1.1	0.531	0.596	Cluster2
323	1426807_at	BE687981	Leukotriene_A4_hydrolase	Lta4h	-1.6	0	0	-1.1	0.239	0.461	Cluster2
324	1458439_a_at	BM231657	DAZ_interacting_protein_3,_zinc_finger	Dzip3	-1.6	0.001	0.001	-1.1	0.537	0.599	Cluster2
325	1453269_at	AK018177	unc-5_homolog_B_(C._elegans)	Unc5b	-1.7	0	0	-1.1	0.319	0.506	Cluster2
326	1452757_s_at	AK011116	hemoglobin_alpha,_adult_chain_1_///_hemoglobin_alpha,_adult_chain_2	Hba-a1_///_Hba-a2	-46.4	0	0	-1.8	0.011	0.135	Cluster2
327	1433630_at	BB762333	MAP6_domain_containing_1	Map6d1	-1.7	0	0	-1.1	0.044	0.251	Cluster2
328	1442538_at	AW742720	---	---	-1.6	0	0	-1.1	0.355	0.525	Cluster2
329	1442800_x_at	AV354929	family_with_sequence_similarity_181,_member_B	Fam181b	-1.8	0	0	-1.1	0.264	0.475	Cluster2
330	1443285_at	BB454536	---	---	-1.7	0	0	-1.1	0.408	0.55	Cluster2
331	1434126_at	BB667775	RIKEN_cDNA_4930402H24_gene	4930402H24Rik	-1.6	0	0	-1.1	0.313	0.503	Cluster2
332	1441219_at	BB003338	---	---	-1.6	0	0	-1.1	0.488	0.581	Cluster2
333	1427379_at	BC020092	---	---	-1.6	0	0	-1	0.457	0.57	Cluster2
334	1434595_at	BQ174474	tripartite_motif-containing_9	Trim9	-1.8	0	0	-1.1	0.462	0.571	Cluster2
335	1458019_at	BB548602	---	---	-1.6	0	0	-1	0.575	0.612	Cluster2
336	1459635_at	BG144294	---	---	-1.8	0	0	-1.1	0.455	0.569	Cluster2
337	1456995_at	BB426857	shisa_homolog_9_(Xenopus_laevis)	Shisa9	-1.7	0	0	-1.1	0.493	0.583	Cluster2
338	1459705_at	BE980857	---	---	-1.6	0.001	0.002	-1	0.728	0.658	Cluster2
339	1434369_a_at	AV016515	crystallin,_alpha_B	Cryab	-2.3	0	0	-1.1	0.199	0.434	Cluster2
340	1430834_at	BB359379	GPRIN_family_member_3	Gprin3	-1.7	0	0.001	-1.1	0.628	0.63	Cluster2
341	1425528_at	L06502	paired_related_homeobox_1	Prrx1	-2.1	0	0	-1.1	0.074	0.305	Cluster2
342	1419459_a_at	NM_025952	magnesium_transporter_1	Magt1	-1.7	0	0	-1.1	0.479	0.578	Cluster2
343	1426413_at	BM116592	neurogenic_differentiation_1	Neurod1	-1.7	0.005	0.007	-1.1	0.746	0.662	Cluster2
344	1434770_at	BG076247	IQ_calmodulin-binding_motif_containing_1	Iqcb1	-2	0	0	-1.1	0.271	0.48	Cluster2
345	1454827_at	BG070415	pogo_transposable_element_with_ZNF_domain	Pogz	-1.8	0	0	-1	0.245	0.464	Cluster2
346	1440981_at	BB266045	p21_protein_(Cdc42/Rac)-activated_kinase_7	Pak7	-1.6	0	0	-1	0.461	0.571	Cluster2
347	1426152_a_at	M64262	kit_ligand	Kitl	-1.8	0	0	-1	0.686	0.647	Cluster2
348	1426863_at	BM123721	RNA_binding_motif_protein,_X_chromosome	Rbmx	-1.6	0	0	-1	0.427	0.558	Cluster2
349	1428574_a_at	AK006398	chimerin_(chimaerin)_2	Chn2	-1.6	0.012	0.013	-1	0.813	0.68	Cluster2
350	1441608_at	BB559910	calcium_channel,_voltage-dependent,_alpha2/delta_subunit_1	Cacna2d1	-1.8	0	0	-1.1	0.673	0.644	Cluster2
351	1438258_at	BE647363	very_low_density_lipoprotein_receptor	Vldlr	-1.6	0	0	-1	0.565	0.608	Cluster2
352	1436410_at	BB346846	Rho_guanine_nucleotide_exchange_factor_(GEF)_33	Arhgef33	-1.6	0.033	0.031	-1	0.877	0.695	Cluster2
353	1439570_at	BE957162	family_with_sequence_similarity_59,_member_B	Fam59b	-1.7	0	0	-1	0.338	0.516	Cluster2
354	1429637_at	AK008987	family_with_sequence_similarity_198,_member_B	Fam198b	-2.4	0	0	-1.1	0.491	0.582	Cluster2
355	1450757_at	NM_009866	cadherin_11	Cdh11	-1.7	0	0	-1	0.534	0.598	Cluster2
356	1447020_at	BB248611	---	---	-1.6	0.002	0.003	-1	0.819	0.681	Cluster2
357	1460151_at	BG070910	---	---	-1.8	0	0	-1	0.501	0.586	Cluster2
358	1446720_at	AW547545	---	---	-1.7	0	0	-1	0.592	0.618	Cluster2
359	1446612_at	BB169371	RIKEN_cDNA_9330118A15_gene	9330118A15Rik	-1.7	0	0	-1	0.635	0.632	Cluster2
360	1438040_a_at	BE995678	heat_shock_protein_90,_beta_(Grp94),_member_1	Hsp90b1	-1.7	0	0	-1	0.683	0.647	Cluster2
361	1434572_at	BB750646	histone_deacetylase_9_///_histone_deacetylase_9-like	Hdac9_///_LOC100861990	-1.7	0	0	-1	0.369	0.532	Cluster2
362	1453273_at	AV142265	potassium_channel,_subfamily_V,_member_1	Kcnv1	-1.6	0	0	-1	0.433	0.56	Cluster2
363	1459068_at	AI464581	---	---	-1.6	0	0	-1	0.627	0.63	Cluster2
364	1424701_at	BB528056	protocadherin_20	Pcdh20	-1.6	0	0	-1	0.245	0.465	Cluster2
365	1459450_at	BB208422	---	---	-1.8	0	0	-1.1	0.436	0.561	Cluster2
366	1454501_at	AK018200	RIKEN_cDNA_6330419E04_gene	6330419E04Rik	-1.6	0.002	0.003	-1.1	0.709	0.653	Cluster2
367	1418086_at	NM_026731	protein_phosphatase_1,_regulatory_(inhibitor)_subunit_14A	Ppp1r14a	-1.7	0	0	-1.1	0.292	0.491	Cluster2
368	1419073_at	NM_019790	transmembrane_protein_with_EGF-like_and_two_follistatin-like_domains_2	Tmeff2	-1.7	0	0	-1	0.358	0.527	Cluster2
369	1455334_at	BG067299	zinc_finger_protein_866	Zfp866	-1.6	0	0	-1	0.71	0.654	Cluster2
370	1428651_at	AK004187	kelch-like_24_(Drosophila)	Klhl24	-1.6	0	0	-1	0.376	0.534	Cluster2
371	1433015_at	AK018204	RIKEN_cDNA_6330436F06_gene	6330436F06Rik	-1.6	0	0	-1	0.705	0.652	Cluster2
372	1456684_at	BB710790	transmembrane_protein_74	Tmem74	-1.7	0	0	-1	0.585	0.616	Cluster2
373	1434206_s_at	BM247370	protein_phosphatase_2,_regulatory_subunit_B_(B56),_gamma_isoform	Ppp2r5c	-1.9	0	0	-1	0.707	0.652	Cluster2
374	1429624_at	BG068009	SAFB-like,_transcription_modulator	Sltm	-1.6	0	0	-1	0.684	0.647	Cluster2
375	1419063_at	NM_011674	UDP_galactosyltransferase_8A	Ugt8a	-4	0	0	-1.1	0.362	0.529	Cluster2
376	1447266_at	BF149102	UTP18,_small_subunit_(SSU)_processome_component,_homolog_(yeast)	Utp18	-1.9	0	0	-1	0.703	0.651	Cluster2
377	1439972_at	BB177192	ethanolamine_kinase_1	Etnk1	-1.7	0	0	-1	0.78	0.672	Cluster2
378	1427620_at	BC026469	cullin_9	Cul9	-1.6	0	0	-1	0.739	0.66	Cluster2
379	1443931_at	AW548399	zinc_finger_protein_882	Zfp882	-1.6	0	0	-1	0.792	0.675	Cluster2
380	1436176_at	BB464622	RIKEN_cDNA_1500004A13_gene	1500004A13Rik	-2	0	0	-1	0.633	0.632	Cluster2
381	1424303_at	BC013499	DEP_domain_containing_7	Depdc7	-2.7	0	0	-1	0.642	0.634	Cluster2
382	1429196_at	BB431654	RAB_GTPase_activating_protein_1-like	Rabgap1l	-1.9	0	0	-1	0.813	0.68	Cluster2
383	1436284_s_at	BE949045	zinc_finger_protein_319	Zfp319	-1.7	0	0	-1	0.714	0.654	Cluster2
384	1435120_at	AV300631	---	---	-1.6	0	0	-1	0.698	0.65	Cluster2
385	1418415_at	NM_008268	homeobox_B5	Hoxb5	-1.7	0.003	0.004	-1	0.91	0.703	Cluster2
386	1439041_at	BM239325	solute_carrier_family_39_(zinc_transporter),_member_10	Slc39a10	-2	0	0	-1	0.76	0.666	Cluster2
387	1440422_at	BB271612	5-hydroxytryptamine_(serotonin)_receptor_1F	Htr1f	-1.6	0.002	0.003	-1	0.912	0.703	Cluster2
388	1439333_at	BB078927	potassium_channel,_subfamily_V,_member_1	Kcnv1	-1.9	0	0	-1	0.722	0.656	Cluster2
389	1456811_at	AV307265	CXXC_finger_4	Cxxc4	-1.9	0	0	-1	0.795	0.675	Cluster2
390	1443101_at	BB132288	---	---	-1.8	0.001	0.001	-1	0.912	0.703	Cluster2
391	1436125_at	AV381575	DNA_segment,_Chr_16,_ERATO_Doi_472,_expressed	D16Ertd472e	-1.7	0	0	-1	0.779	0.672	Cluster2
392	1438169_a_at	BB009122	FERM_domain_containing_4B	Frmd4b	-1.6	0	0	-1	0.868	0.693	Cluster2
393	1444874_at	BG074583	ATP_synthase,_H+_transporting,_mitochondrial_F0_complex,_subunit_c1_(subunit_9)	Atp5g1	-2.4	0	0	-1	0.826	0.682	Cluster2
394	1418750_at	NM_019587	plexin_B3	Plxnb3	-1.6	0	0	-1	0.868	0.693	Cluster2
395	1457235_at	BB129193	low_density_lipoprotein-related_protein_1B_(deleted_in_tumors)	Lrp1b	-1.6	0	0	-1	0.917	0.704	Cluster2
396	1434262_at	AV259693	---	---	-1.9	0	0	-1	0.925	0.705	Cluster2
397	1434520_at	AU067703	sterol-C5-desaturase_(fungal_ERG3,_delta-5-desaturase)_homolog_(S._cerevisae)	Sc5d	-2.4	0	0	-1.1	0.03	0.212	Cluster2
398	1440071_at	BB367260	membrane_associated_guanylate_kinase,_WW_and_PDZ_domain_containing_1	Magi1	-1.6	0	0	-1.1	0.114	0.359	Cluster2
399	1441666_at	BB197117	---	---	-2.2	0	0	-1.1	0.083	0.319	Cluster2
400	1435265_at	BF466929	F-box_protein_32	Fbxo32	-1.7	0	0	-1.1	0.215	0.445	Cluster2
401	1443589_at	C79245	DNA_segment,_Chr_X,_ERATO_Doi_242,_expressed	DXErtd242e	-2.1	0	0	-1.1	0.246	0.465	Cluster2
402	1427246_at	BB702366	membrane_associated_guanylate_kinase,_WW_and_PDZ_domain_containing_1	Magi1	-1.6	0	0	-1	0.459	0.57	Cluster2
403	1451706_a_at	AF256198	gamma-aminobutyric_acid_(GABA)_A_receptor,_subunit_alpha_6	Gabra6	-2.3	0.042	0.038	-1.1	0.871	0.694	Cluster2
404	1459698_at	BM123577	---	---	-2	0	0	-1.1	0.507	0.588	Cluster2
405	1424778_at	AK005026	receptor_accessory_protein_3	Reep3	-1.6	0.001	0.002	-1	0.783	0.673	Cluster2
406	1439840_at	BB208426	polymerase_(DNA_directed),_beta	Polb	-1.8	0	0	-1	0.304	0.498	Cluster2
407	1441848_at	BB521034	---	---	-1.6	0	0	-1	0.579	0.614	Cluster2
408	1440729_at	AI649374	epidermal_growth_factor_receptor_pathway_substrate_15	Eps15	-2	0	0	-1.1	0.621	0.628	Cluster2
409	1424768_at	BI248947	caldesmon_1	Cald1	-1.6	0.003	0.004	-1	0.784	0.673	Cluster2
410	1431724_a_at	AK013804	purinergic_receptor_P2Y,_G-protein_coupled_12	P2ry12	-2.3	0	0	-1.1	0.106	0.35	Cluster2
411	1436519_a_at	BB534387	RIKEN_cDNA_1110057K04_gene	1110057K04Rik	-1.7	0	0	-1	0.597	0.62	Cluster2
412	1458637_x_at	BE690666	---	---	-1.6	0	0	-1	0.69	0.648	Cluster2
413	1439964_at	AA958820	---	---	-1.8	0	0	-1	0.47	0.574	Cluster2
414	1448673_at	NM_021495	poliovirus_receptor-related_3	Pvrl3	-1.8	0	0	-1	0.498	0.585	Cluster2
415	1440846_at	BB430553	suppressor_of_cancer_cell_invasion	Scai	-1.7	0	0	-1	0.501	0.586	Cluster2
416	1455724_at	BM230193	proline_rich_Gla_(G-carboxyglutamic_acid)_1	Prrg1	-1.7	0	0	-1	0.347	0.52	Cluster2
417	1440290_at	AW494128	Predicted_gene_10010	Gm10010	-1.6	0.001	0.002	-1	0.829	0.683	Cluster2
418	1456533_at	BM119324	dpy-19-like_1_(C._elegans)	Dpy19l1	-1.7	0	0	-1	0.619	0.627	Cluster2
419	1428541_at	BE944524	family_with_sequence_similarity_115,_member_A	Fam115a	-1.6	0	0	-1	0.731	0.659	Cluster2
420	1455412_at	BG064966	Scm-like_with_four_mbt_domains_1	Sfmbt1	-1.7	0	0	-1	0.531	0.596	Cluster2
421	1441127_at	BB460036	SLIT_and_NTRK-like_family,_member_2	Slitrk2	-1.8	0	0	-1	0.605	0.622	Cluster2
422	1436585_at	BB506740	expressed_sequence_BB182297	BB182297	-1.9	0	0	-1	0.817	0.681	Cluster2
423	1456370_s_at	BB044881	RIKEN_cDNA_0610037L13_gene	0610037L13Rik	-1.8	0	0	-1	0.752	0.664	Cluster2
424	1424974_at	BC024761	zinc_finger_protein_418	Zfp418	-1.9	0	0	-1	0.681	0.646	Cluster2
425	1418868_at	NM_010134	engrailed_2	En2	-1.6	0.023	0.023	-1	0.934	0.707	Cluster2
426	1418534_at	BB371406	frizzled_homolog_2_(Drosophila)	Fzd2	-1.9	0	0	-1	0.75	0.663	Cluster2
427	1438737_at	AV029604	zinc_finger_protein_of_the_cerebellum_3	Zic3	-1.6	0	0	-1	0.835	0.685	Cluster2
428	1443865_at	BQ174589	gamma-aminobutyric_acid_(GABA)_A_receptor,_subunit_alpha_2	Gabra2	-2.3	0	0	-1	0.784	0.673	Cluster2
429	1439181_at	AV020760	zinc_finger_protein_658	Zfp658	-1.8	0	0	-1	0.87	0.694	Cluster2
430	1435109_at	AW123256	RIKEN_cDNA_0710007G10_gene_///_transmembrane_protein_175	0710007G10Rik_///_Tmem175	-1.6	0	0	-1	0.729	0.658	Cluster2
431	1456121_at	BM224149	centrosomal_protein_97	Cep97	-1.9	0	0	-1	0.675	0.645	Cluster2
432	1440560_at	AU067691	---	---	-1.6	0	0	-1	0.756	0.665	Cluster2
433	1457257_x_at	BB380053	poliovirus_receptor-related_3	Pvrl3	-1.6	0	0	-1	0.743	0.662	Cluster2
434	1451509_at	BC019453	TAF9_RNA_polymerase_II,_TATA_box_binding_protein_(TBP)-associated_factor	Taf9	-1.9	0	0	-1	0.818	0.681	Cluster2
435	1434858_x_at	BQ178976	zinc_finger_protein_511	Zfp511	-2.1	0	0	-1	0.84	0.686	Cluster2
436	1439815_at	BF140677	HEAT_repeat_containing_5B_///_HEAT_repeat-containing_protein_5B-like	Heatr5b_///_LOC100862586	-1.6	0	0	-1	0.832	0.684	Cluster2
437	1453824_at	BG085812	coiled-coil_domain_containing_76	Ccdc76	-1.7	0	0	-1	0.905	0.702	Cluster2
438	1450875_at	BQ175510	G_protein-coupled_receptor_37	Gpr37	-1.9	0	0	-1.1	0.002	0.054	Cluster2
439	1446480_at	BB484462	Uncharacterized_LOC100505026	LOC100505026	-2	0	0	-1.1	0.04	0.242	Cluster2
440	1443536_at	BB453858	solute_carrier_family_7_(cationic_amino_acid_transporter,_y+_system),_member_11	Slc7a11	-1.6	0	0	-1.1	0.226	0.452	Cluster2
441	1441721_at	AW121215	---	---	-1.6	0	0	-1.1	0.081	0.317	Cluster2
442	1435635_at	BB549335	protein-L-isoaspartate_(D-aspartate)_O-methyltransferase_domain_containing_1	Pcmtd1	-1.8	0.003	0.004	-1.1	0.568	0.609	Cluster2
443	1438624_x_at	BB494451	heparan_sulfate_(glucosamine)_3-O-sulfotransferase_2	Hs3st2	-1.6	0	0	-1.1	0.174	0.415	Cluster2
444	1431182_at	AK004608	heat_shock_protein_8	Hspa8	-2.6	0	0	-1.2	0.059	0.28	Cluster2
445	1441004_at	BB006752	---	---	-1.6	0	0	-1.1	0.149	0.392	Cluster2
446	1444143_at	AI449132	---	---	-1.8	0	0	-1.1	0.29	0.491	Cluster2
447	1425176_at	BB768838	C1q-like_3	C1ql3	-1.7	0	0.001	-1.1	0.504	0.586	Cluster2
448	1426802_at	BB756379	septin_8	2008-09-01	-1.9	0	0	-1.2	0.004	0.074	Cluster2
449	1439247_at	BB763030	dedicator_of_cytokinesis_10	Dock10	-1.7	0.003	0.004	-1.2	0.374	0.533	Cluster2
450	1419564_at	NM_020589	zinc_finger_protein_467	Zfp467	-1.6	0	0	-1.1	0.02	0.179	Cluster2
451	1436257_at	BB199855	synovial_sarcoma_translocation,_Chromosome_18	Ss18	-1.6	0.001	0.001	-1.1	0.326	0.51	Cluster2
452	1423852_at	BC024118	shisa_homolog_2_(Xenopus_laevis)	Shisa2	-1.7	0	0	-1.1	0.025	0.197	Cluster2
453	1417184_s_at	BC027434	hemoglobin_subunit_beta-1-like_///_hemoglobin,_beta_adult_major_chain_///_hemoglobin,_beta_adult_minor_chain	Beta-s_///_Hbb-b1_///_Hbb-b2	-12.8	0	0	-1.6	0.024	0.194	Cluster2
454	1460406_at	BC026410	plastin_1_(I-isoform)	Pls1	-1.6	0	0	-1.1	0.014	0.152	Cluster2
455	1454551_at	AK020585	RIKEN_cDNA_9530034D02_gene	9530034D02Rik	-1.8	0	0	-1.1	0.37	0.532	Cluster2
456	1445523_at	BB315012	Gap_junction_protein,_gamma_3	Gjc3	-3	0	0	-1.3	0.03	0.214	Cluster2
457	1450468_at	AW125804	myocilin	Myoc	-1.6	0	0	-1.1	0.082	0.317	Cluster2
458	1447237_at	BE950979	---	---	-1.7	0	0.001	-1.1	0.35	0.523	Cluster2
459	1440282_at	BB268998	tubby_like_protein_4	Tulp4	-1.6	0.031	0.03	-1.1	0.612	0.625	Cluster2
460	1441969_at	BM933729	tripartite_motif-containing_36	Trim36	-1.6	0	0	-1.1	0.004	0.083	Cluster2
461	1441728_at	BI731739	sodium_channel,_voltage-gated,_type_I,_alpha	Scn1a	-1.6	0.007	0.009	-1.1	0.419	0.555	Cluster2
462	1436655_at	BE986653	lon_peptidase_2,_peroxisomal	Lonp2	-1.6	0	0	-1.1	0.057	0.278	Cluster2
463	1440623_at	BB128997	G_protein-coupled_receptor_26	Gpr26	-1.6	0.002	0.003	-1.1	0.379	0.535	Cluster2
464	1438801_at	BB709245	dynamin_3	Dnm3	-1.9	0.007	0.009	-1.2	0.459	0.57	Cluster2
465	1455847_at	BM228403	p21_protein_(Cdc42/Rac)-activated_kinase_7	Pak7	-1.6	0	0	-1.1	0.105	0.349	Cluster2
466	1418407_at	BB220000	phosphodiesterase_8A	Pde8a	-1.8	0	0	-1.1	0.119	0.364	Cluster2
467	1454770_at	AV221910	cholecystokinin_B_receptor	Cckbr	-1.8	0	0	-1.2	0.025	0.196	Cluster2
468	1456140_at	BM199323	zinc_finger_protein_of_the_cerebellum_5	Zic5	-1.6	0.001	0.002	-1.1	0.388	0.54	Cluster2
469	1436195_at	BM933144	cDNA_sequence_BC046404	BC046404	-1.9	0	0	-1.2	0.019	0.176	Cluster2
470	1432161_a_at	AK006988	protein_prenyltransferase_alpha_subunit_repeat_containing_1	Ptar1	-1.6	0.003	0.004	-1.1	0.382	0.538	Cluster2
471	1457152_at	BB451702	---	---	-1.6	0.002	0.003	-1.1	0.353	0.524	Cluster2
472	1441778_at	BB171354	---	---	-1.6	0	0	-1.1	0.03	0.212	Cluster2
473	1416357_a_at	NM_023061	melanoma_cell_adhesion_molecule	Mcam	-1.6	0	0	-1.1	0.019	0.174	Cluster2
474	1421955_a_at	NM_010890	neural_precursor_cell_expressed,_developmentally_down-regulated_4	Nedd4	-1.6	0.009	0.01	-1.1	0.516	0.591	Cluster2
475	1429060_at	AK020483	metastasis_associated_lung_adenocarcinoma_transcript_1_(non-coding_RNA)	Malat1	-1.7	0	0	-1.1	0.041	0.243	Cluster2
476	1425660_at	BC018174	BTB_(POZ)_domain_containing_3	Btbd3	-1.8	0	0	-1.1	0.203	0.437	Cluster2
477	1446755_at	BB462555	---	---	-1.8	0	0	-1.2	0.22	0.448	Cluster2
478	1426478_at	AA124924	RAS_p21_protein_activator_1	Rasa1	-1.6	0	0	-1.1	0.206	0.44	Cluster2
479	1441197_at	AW494454	RIKEN_cDNA_9530059O14_gene	9530059O14Rik	-1.9	0	0	-1.2	0.119	0.364	Cluster2
480	1458534_at	BB281929	regulator_of_G-protein_signalling_7_binding_protein	Rgs7bp	-1.9	0	0	-1.2	0.259	0.473	Cluster2
481	1458385_at	AI461691	heat_shock_protein_4_like	Hspa4l	-1.6	0.004	0.005	-1.1	0.421	0.555	Cluster2
482	1423194_at	BM248774	Rho_GTPase_activating_protein_5	Arhgap5	-1.6	0	0	-1.1	0.258	0.472	Cluster2
483	1456092_at	AV273256	potassium_channel_tetramerisation_domain_containing_7	Kctd7	-1.6	0	0	-1.1	0.005	0.087	Cluster2
484	1442791_x_at	BF459282	RIKEN_cDNA_6720407P12_gene	6720407P12Rik	-1.6	0	0	-1.1	0.363	0.529	Cluster2
485	1423343_at	BB667135	solute_carrier_organic_anion_transporter_family,_member_1c1	Slco1c1	-1.8	0	0	-1.1	0.042	0.246	Cluster2
486	1451920_a_at	M88489	replication_factor_C_(activator_1)_1	Rfc1	-1.7	0.003	0.004	-1.1	0.489	0.581	Cluster2
487	1441727_s_at	BE628275	zinc_finger_protein_467	Zfp467	-1.8	0	0	-1.1	0.042	0.246	Cluster2
488	1450712_at	NM_008429	potassium_inwardly-rectifying_channel,_subfamily_J,_member_9	Kcnj9	-1.6	0.001	0.002	-1.1	0.486	0.58	Cluster2
489	1455392_at	BB081437	proline_rich_region_18	Prr18	-2.1	0	0	-1.1	0.059	0.282	Cluster2
490	1459295_at	BB524598	---	---	-2	0	0	-1.1	0.527	0.595	Cluster2
491	1438331_at	BB491630	---	---	-1.9	0	0	-1.1	0.029	0.21	Cluster2
492	1438244_at	BB092799	nuclear_factor_I/B	Nfib	-1.6	0	0	-1.1	0.353	0.525	Cluster2
493	1437248_at	BM230224	RIKEN_cDNA_2700049A03_gene	2700049A03Rik	-1.6	0	0.001	-1.1	0.549	0.603	Cluster2
494	1438465_at	BG069515	zinc_finger_protein_826	Zfp826	-1.9	0	0	-1.2	0.035	0.229	Cluster2
495	1460465_at	BE632850	RIKEN_cDNA_A930038C07_gene	A930038C07Rik	-1.7	0	0	-1.1	0.051	0.267	Cluster2
496	1456127_at	AV299691	canopy_1_homolog_(zebrafish)	Cnpy1	-1.9	0.004	0.006	-1.2	0.408	0.55	Cluster2
497	1417155_at	BC005453	v-myc_myelocytomatosis_viral_related_oncogene,_neuroblastoma_derived_(avian)	Mycn	-2.5	0	0	-1.3	0.006	0.097	Cluster2
498	1457421_at	AW491934	RIKEN_cDNA_1700063D05_gene	1700063D05Rik	-1.7	0	0	-1.1	0.062	0.286	Cluster2
499	1459733_at	AI606844	---	---	-2	0	0	-1.2	0.123	0.368	Cluster2
500	1450650_at	AV297945	myosin_X	Myo10	-1.6	0	0	-1.1	0.223	0.45	Cluster2
501	1459619_at	BB254042	erythrocyte_protein_band_4.1-like_2	Epb4.1l2	-1.7	0.003	0.004	-1.1	0.441	0.564	Cluster2
502	1418472_at	BC024934	aspartoacylase	Aspa	-1.9	0	0	-1.2	0.006	0.099	Cluster2
503	1448747_at	AF441120	F-box_protein_32	Fbxo32	-1.6	0	0	-1.1	0.161	0.403	Cluster2
504	1416154_at	NM_011899	signal_recognition_particle_54A_///_signal_recognition_particle_54B	Srp54a_///_Srp54b	-1.6	0	0	-1.1	0.206	0.439	Cluster2
505	1450083_at	AI448404	CCR4-NOT_transcription_complex,_subunit_4	Cnot4	-1.6	0	0.001	-1.1	0.269	0.478	Cluster2
506	1448752_at	NM_009801	carbonic_anhydrase_2	Car2	-2.3	0	0	-1.1	0.006	0.096	Cluster2
507	1423320_at	AI507229	deoxyribonuclease_1-like_2	Dnase1l2	-1.7	0	0	-1.1	0.202	0.436	Cluster2
508	1426544_a_at	BB118847	tetratricopeptide_repeat_domain_14	Ttc14	-1.7	0	0	-1.1	0.408	0.55	Cluster2
509	1433066_at	AK018211	RIKEN_cDNA_6330510M09_gene	6330510M09Rik	-2	0	0.001	-1.1	0.534	0.598	Cluster2
510	1457316_at	BM233608	microtubule-associated_protein_6	Mtap6	-1.8	0	0	-1.1	0.023	0.191	Cluster2
511	1439767_at	BB130159	discs,_large_(Drosophila)_homolog-associated_protein_2	Dlgap2	-1.6	0.011	0.013	-1.1	0.563	0.608	Cluster2
512	1416473_a_at	NM_020043	immunoglobulin_superfamily,_DCC_subclass,_member_4	Igdcc4	-1.7	0	0	-1.1	0.003	0.065	Cluster2
513	1416661_at	AW701127	eukaryotic_translation_initiation_factor_3,_subunit_A	Eif3a	-1.7	0.01	0.012	-1.1	0.556	0.605	Cluster2
514	1454622_at	BG066984	solute_carrier_family_38,_member_5	Slc38a5	-1.8	0	0	1.3	0.002	0.06	Cluster2
515	1457472_at	BB782031	GRB10_interacting_GYF_protein_2	Gigyf2	-2	0	0	1.3	0.02	0.178	Cluster2
516	1442051_at	BE691662	histone_cluster_1,_H3b_///_histone_cluster_1,_H3c_///_histone_cluster_1,_H3d_///_histone_cluster_1,_H3e_///_histone_cluster_1,_H3f_///_histone_cluster_2,_H3b_///_histone_cluster_2,_H3c1_///_histone_cluster_2,_H3c2	Hist1h3b_///_Hist1h3c_///_Hist1h3d_///_Hist1h3e_///_Hist1h3f_///_Hist2h3b_///_Hist2h3c1_///_Hist2h3c2	-1.8	0	0	1.2	0.068	0.297	Cluster2
517	1439837_at	BE136147	GRB10_interacting_GYF_protein_2	Gigyf2	-1.8	0	0	1.2	0.028	0.205	Cluster2
518	1416147_at	BE912771	heat_shock_protein_4	Hspa4	-1.7	0	0	1.2	0.071	0.3	Cluster2
519	1435606_at	BF147815	galactose-3-O-sulfotransferase_4_///_glypican_2_(cerebroglycan)	Gal3st4_///_Gpc2	-1.6	0	0	1.1	0.039	0.24	Cluster2
520	1452053_a_at	BB771960	transmembrane_protein_33	Tmem33	-1.6	0	0	1.1	0.07	0.299	Cluster2
521	1439932_at	BQ174624	UBX_domain_protein_2B	Ubxn2b	-1.6	0	0	1.1	0.095	0.336	Cluster2
522	1435328_at	AW542554	cysteine_and_histidine_rich_1	Cyhr1	-1.6	0	0	1.1	0.083	0.319	Cluster2
523	1452623_at	BC028265	zinc_finger_protein_759	Zfp759	-1.6	0	0	1.1	0.291	0.491	Cluster2
524	1443108_at	BB079339	---	---	-1.9	0	0	1.1	0.015	0.156	Cluster2
525	1457861_at	BB169454	RIKEN_cDNA_A230009B12_gene	A230009B12Rik	-2.1	0	0	1.1	0.168	0.41	Cluster2
526	1447066_at	AW146378	predicted_gene_15535	Gm15535	-1.6	0	0	1.1	0.404	0.548	Cluster2
527	1452129_at	BB430390	parathyroid_hormone_2_receptor	Pth2r	-1.6	0	0	1.1	0.227	0.452	Cluster2
528	1447452_at	AW124565	---	---	-1.6	0	0	1.1	0.304	0.499	Cluster2
529	1455638_at	BE949045	zinc_finger_protein_319	Zfp319	-1.7	0	0	1.1	0.08	0.315	Cluster2
530	1441733_s_at	C88147	nucleoporin_153	Nup153	-1.8	0	0	1.1	0.146	0.389	Cluster2
531	1443525_at	BB125520	developing_brain_homeobox_2	Dbx2	-1.6	0	0	1.1	0.254	0.47	Cluster2
532	1458119_at	BB479245	solute_carrier_family_25,_member_27	Slc25a27	-1.7	0	0	1.1	0.327	0.511	Cluster2
533	1429504_at	BE134108	amylase_1,_salivary_///_RNA-binding_region_(RNP1,_RRM)_containing_3	Amy1_///_Rnpc3	-1.7	0	0	1.1	0.394	0.542	Cluster2
534	1441639_at	BB258225	zinc_finger,_CCHC_domain_containing_8	Zcchc8	-1.7	0	0	1.1	0.478	0.577	Cluster2
535	1432108_at	AK016709	polycomb_group_ring_finger_6	Pcgf6	-1.6	0	0	1	0.432	0.56	Cluster2
536	1430032_at	AK019871	RNA_binding_motif_protein_4B	Rbm4b	-1.6	0	0	1	0.246	0.465	Cluster2
537	1452617_at	BG073014	single-stranded_DNA_binding_protein_1	Ssbp1	-1.9	0	0	1	0.554	0.604	Cluster2
538	1444461_at	BB346871	Zinc_finger,_MYND_domain_containing_11	Zmynd11	-1.6	0	0	1	0.602	0.622	Cluster2
539	1437256_at	BE824946	DCN1,_defective_in_cullin_neddylation_1,_domain_containing_5_(S._cerevisiae)	Dcun1d5	-1.8	0	0	1	0.705	0.652	Cluster2
540	1440202_at	BB036159	RIKEN_cDNA_E430024I08_gene	E430024I08Rik	-1.6	0	0	1	0.717	0.655	Cluster2
541	1444169_at	BB283427	RIKEN_cDNA_3110052M02_gene	3110052M02Rik	-1.8	0	0	1	0.595	0.619	Cluster2
542	1442588_at	BB117375	predicted_gene_5101	Gm5101	-1.6	0	0	1	0.403	0.548	Cluster2
543	1458954_at	AW455375	Predicted_gene_13308	Gm13308	-1.7	0	0	1.1	0.548	0.603	Cluster2
544	1430030_at	AK019912	RIKEN_cDNA_5330426P16_gene	5330426P16Rik	-2	0	0	1.1	0.066	0.293	Cluster2
545	1438030_at	BB042252	RAS,_guanyl_releasing_protein_3	Rasgrp3	-1.7	0	0	1	0.493	0.583	Cluster2
546	1438296_at	BE632919	Slc2a4_regulator,_pseudogene	Slc2a4rg-ps	-1.7	0	0	1	0.585	0.616	Cluster2
547	1418715_at	BC023496	pantothenate_kinase_1	Pank1	-1.6	0	0	1	0.47	0.574	Cluster2
548	1455698_at	BQ175470	SEC62_homolog_(S._cerevisiae)	Sec62	-1.6	0	0	1	0.532	0.597	Cluster2
549	1458645_at	BF464638	---	---	-1.6	0	0	1	0.661	0.64	Cluster2
550	1439566_at	BB245373	GPRIN_family_member_3	Gprin3	-2	0	0	1	0.659	0.64	Cluster2
551	1438915_at	AI452037	RIKEN_cDNA_6720401G13_gene	6720401G13Rik	-2.6	0	0	1.1	0.427	0.558	Cluster2
552	1442823_at	BB536648	---	---	-1.6	0	0	1	0.622	0.628	Cluster2
553	1440902_at	AI854460	ermin,_ERM-like_protein	Ermn	-2.7	0	0	1	0.494	0.583	Cluster2
554	1452238_at	BB130716	ArfGAP_with_FG_repeats_1	Agfg1	-1.6	0	0	1	0.622	0.628	Cluster2
555	1442627_at	BB455122	Zinc_finger_protein_709-like	LOC100862611	-1.7	0	0	1	0.748	0.663	Cluster2
556	1428778_at	AK019095	Sfi1_homolog,_spindle_assembly_associated_(yeast)	Sfi1	-1.7	0	0	1	0.712	0.654	Cluster2
557	1456535_at	AV372341	vacuolar_protein_sorting_13C_(yeast)	Vps13c	-1.6	0	0	1	0.737	0.66	Cluster2
558	1456812_at	AW456685	ATP-binding_cassette,_sub-family_D_(ALD),_member_2	Abcd2	-1.8	0	0	1	0.709	0.653	Cluster2
559	1417834_at	NM_025292	synaptojanin_2_binding_protein	Synj2bp	-1.8	0	0	1	0.696	0.65	Cluster2
560	1444026_at	BF658761	expressed_sequence_AI593442	AI593442	-1.6	0	0	1	0.679	0.646	Cluster2
561	1437461_s_at	BB557441	RNA-binding_region_(RNP1,_RRM)_containing_3	Rnpc3	-1.7	0	0	1	0.836	0.685	Cluster2
562	1448454_at	AW539046	serine/arginine-rich_splicing_factor_6	Srsf6	-1.7	0	0	1	0.383	0.538	Cluster2
563	1429197_s_at	BB431654	RAB_GTPase_activating_protein_1-like	Rabgap1l	-1.7	0	0	1	0.455	0.569	Cluster2
564	1427410_at	BB812902	deleted_in_lymphocytic_leukemia,_2	Dleu2	-2.9	0	0	1.1	0.364	0.53	Cluster2
565	1446399_at	BB522094	cadherin_10	Cdh10	-2.1	0	0	1.1	0.431	0.56	Cluster2
566	1454014_a_at	AK004987	McKusick-Kaufman_syndrome_protein	Mkks	-2.2	0	0	1	0.545	0.601	Cluster2
567	1434298_at	BQ174116	zinc_finger_E-box_binding_homeobox_2	Zeb2	-1.8	0	0	1	0.52	0.592	Cluster2
568	1444714_at	BB529567	doublecortin_domain_containing_2b	Dcdc2b	-1.7	0	0	1	0.732	0.659	Cluster2
569	1429629_at	AK003058	enhancer_of_zeste_homolog_1_(Drosophila)	Ezh1	-1.6	0	0	1	0.431	0.56	Cluster2
570	1429059_s_at	AK003403	transmembrane_protein_107	Tmem107	-1.6	0	0	1	0.406	0.549	Cluster2
571	1439332_at	AV251625	DNA-damage-inducible_transcript_4-like	Ddit4l	-1.9	0	0	1.1	0.445	0.565	Cluster2
572	1415994_at	NM_021282	cytochrome_P450,_family_2,_subfamily_e,_polypeptide_1	Cyp2e1	-1.7	0	0	1	0.734	0.66	Cluster2
573	1433902_at	BB469300	kelch_repeat_and_BTB_(POZ)_domain_containing_8	Kbtbd8	-1.6	0	0	1	0.427	0.558	Cluster2
574	1452423_at	AW493746	piccolo_(presynaptic_cytomatrix_protein)	Pclo	-1.7	0	0	1	0.646	0.636	Cluster2
575	1449251_at	NM_010883	Norrie_disease_(pseudoglioma)_(human)	Ndp	-1.7	0	0	1	0.575	0.612	Cluster2
576	1447584_s_at	AI642973	myc_target_1	Myct1	-1.6	0	0	1	0.621	0.628	Cluster2
577	1444550_at	AI480952	RIKEN_cDNA_1110021J02_gene	1110021J02Rik	-1.9	0	0	1	0.714	0.654	Cluster2
578	1422542_at	NM_011823	G_protein-coupled_receptor_34	Gpr34	-3.9	0	0	-1.1	0.187	0.425	Cluster2
579	1423569_at	AW108522	glycine_amidinotransferase_(L-arginine:glycine_amidinotransferase)	Gatm	-1.6	0	0	-1	0.504	0.586	Cluster2
580	1438038_at	C78926	RIKEN_cDNA_4930402H24_gene	4930402H24Rik	-1.6	0	0	-1	0.568	0.609	Cluster2
581	1446624_at	BB518629	fukutin	Fktn	-1.7	0	0	-1	0.682	0.646	Cluster2
582	1431026_at	BF168504	N(alpha)-acetyltransferase_30,_NatC_catalytic_subunit	Naa30	-2.1	0	0	-1	0.545	0.602	Cluster2
583	1457302_at	BG144370	Predicted_gene,_17491	Gm17491	-1.6	0	0	-1	0.701	0.651	Cluster2
584	1431686_a_at	AK013970	glia_maturation_factor,_beta	Gmfb	-1.6	0	0	-1	0.822	0.681	Cluster2
585	1417158_at	BB238025	ZXD_family_zinc_finger_C	Zxdc	-1.9	0	0	-1	0.349	0.522	Cluster2
586	1429284_at	BB248684	MOB_kinase_activator_3B	Mob3b	-1.8	0	0	-1	0.506	0.587	Cluster2
587	1447987_at	BB443603	leucine_zipper-EF-hand_containing_transmembrane_protein_2	Letm2	-1.6	0	0	-1	0.58	0.614	Cluster2
588	1453783_at	BE864772	purine_rich_element_binding_protein_A	Pura	-1.6	0	0	-1	0.694	0.65	Cluster2
589	1430660_at	AV291471	RIKEN_cDNA_1500004A13_gene	1500004A13Rik	-1.9	0	0	-1	0.593	0.619	Cluster2
590	1419064_a_at	NM_011674	UDP_galactosyltransferase_8A	Ugt8a	-2.1	0	0	-1	0.638	0.633	Cluster2
591	1426879_at	AK004493	RIKEN_cDNA_1190005F20_gene	1190005F20Rik	-1.6	0	0	-1	0.69	0.648	Cluster2
592	1438073_at	AW047633	sprouty_homolog_3_(Drosophila)	Spry3	-1.7	0	0	-1	0.763	0.667	Cluster2
593	1443086_at	BB534113	activated_leukocyte_cell_adhesion_molecule	Alcam	-1.8	0	0	-1	0.758	0.665	Cluster2
594	1456898_at	AI426862	purine_rich_element_binding_protein_A	Pura	-1.6	0	0	-1	0.705	0.652	Cluster2
595	1456200_at	BM225636	inositol_polyphosphate_multikinase	Ipmk	-1.6	0	0	-1	0.595	0.619	Cluster2
596	1430245_at	BM209124	---	---	-1.7	0	0	-1	0.777	0.671	Cluster2
597	1434136_at	BE571820	transmembrane_protein_229A	Tmem229a	-1.7	0	0	-1	0.561	0.607	Cluster2
598	1423796_at	AY034062	splicing_factor_proline/glutamine_rich_(polypyrimidine_tract_binding_protein_associated)	Sfpq	-1.8	0	0	-1	0.734	0.66	Cluster2
599	1433751_at	BM250411	solute_carrier_family_39_(zinc_transporter),_member_10	Slc39a10	-1.8	0	0	-1	0.773	0.67	Cluster2
600	1455748_at	AI662241	dynein_light_chain_Tctex-type_1F_///_transmembrane_protein_181A	Dynlt1f_///_Tmem181a	-1.6	0	0	-1	0.772	0.67	Cluster2
601	1429768_at	BB355121	dystrobrevin_alpha	Dtna	-1.6	0	0	-1	0.848	0.688	Cluster2
602	1440220_at	AV304145	occludin	Ocln	-1.8	0	0	-1	0.893	0.699	Cluster2
603	1436594_at	BB281667	zinc_finger_protein_719	Zfp719	-1.6	0	0	-1	0.896	0.7	Cluster2
604	1457886_at	BG075804	uncharacterized_LOC552873	LOC552873	-1.6	0	0	-1	0.9	0.701	Cluster2
605	1456904_at	BQ101405	---	---	-1.9	0	0	1.1	0.377	0.535	Cluster2
606	1440840_at	BB335455	RIKEN_cDNA_D630004K10_gene	D630004K10Rik	-1.8	0	0	1	0.411	0.551	Cluster2
607	1428233_at	BB425379	cleavage_and_polyadenylation_specific_factor_6	Cpsf6	-1.8	0	0	1	0.341	0.517	Cluster2
608	1428117_x_at	BG093881	dynein_light_chain_Tctex-type_1F	Dynlt1f	-1.6	0	0	1	0.555	0.605	Cluster2
609	1438570_at	BE631083	---	---	-1.8	0	0	1	0.568	0.609	Cluster2
610	1435692_at	BQ176086	potassium_channel_tetramerisation_domain_containing_21	Kctd21	-1.9	0	0	1	0.645	0.635	Cluster2
611	1438916_x_at	AI452037	RIKEN_cDNA_6720401G13_gene	6720401G13Rik	-2.3	0	0	1.1	0.509	0.588	Cluster2
612	1457011_at	BB797251	---	---	-1.6	0	0	1	0.716	0.654	Cluster2
613	1425217_a_at	AF041862	synaptojanin_2	Synj2	-1.6	0	0	1	0.593	0.619	Cluster2
614	1418565_at	BC006030	serpine1_mRNA_binding_protein_1	Serbp1	-1.6	0	0	1	0.614	0.625	Cluster2
615	1441471_at	BG075185	RIKEN_cDNA_2810002D19_gene	2810002D19Rik	-2.2	0	0	1	0.527	0.595	Cluster2
616	1430745_at	AK020028	RIKEN_cDNA_5930409G06_gene	5930409G06Rik	-1.8	0	0	1	0.546	0.602	Cluster2
617	1439633_at	BQ175636	synaptotagmin_VII	Syt7	-1.7	0	0	1	0.744	0.662	Cluster2
618	1455831_at	BE985138	fusion,_derived_from_t(12;16)_malignant_liposarcoma_(human)	Fus	-1.9	0	0	1	0.728	0.658	Cluster2
619	1456069_at	BM117918	dystrobrevin_alpha	Dtna	-1.7	0	0	1	0.739	0.66	Cluster2
620	1417319_at	NM_021495	poliovirus_receptor-related_3	Pvrl3	-1.7	0	0	1	0.687	0.647	Cluster2
621	1448926_at	BC011063	homeobox_A5	Hoxa5	-1.8	0.001	0.002	1	0.894	0.7	Cluster2
622	1444139_at	BG797099	DNA-damage-inducible_transcript_4-like	Ddit4l	-1.8	0	0	1	0.762	0.666	Cluster2
623	1442709_at	BF147024	---	---	-1.6	0	0.001	1	0.906	0.702	Cluster2
624	1442570_at	BB306845	---	---	-3.5	0	0	1	0.737	0.66	Cluster2
625	1451751_at	AF335325	DNA-damage-inducible_transcript_4-like	Ddit4l	-1.7	0	0	1	0.827	0.682	Cluster2
626	1431491_at	BB103682	RIKEN_cDNA_9430087N24_gene	9430087N24Rik	-1.7	0	0	1	0.819	0.681	Cluster2
627	1449999_a_at	NM_009784	calcium_channel,_voltage-dependent,_alpha2/delta_subunit_1	Cacna2d1	-1.6	0.003	0.004	1	0.937	0.708	Cluster2
628	1457673_at	AI643819	cadherin_11_pseudogene	2610005L07Rik	-1.7	0	0	1	0.798	0.676	Cluster2
629	1447864_s_at	AV377712	pogo_transposable_element_with_KRAB_domain	Pogk	-1.6	0	0	1	0.782	0.672	Cluster2
630	1440354_at	BB149977	ELOVL_family_member_7,_elongation_of_long_chain_fatty_acids_(yeast)	Elovl7	-1.7	0	0	1	0.862	0.692	Cluster2
631	1449084_s_at	NM_012059	SH3_domain_protein_D19	Sh3d19	-1.8	0	0	1	0.853	0.689	Cluster2
632	1436550_at	BB706685	F-box_protein_30	Fbxo30	-3	0	0	1	0.805	0.678	Cluster2
633	1436854_at	AV284133	transient_receptor_potential_cation_channel,_subfamily_C,_member_2	Trpc2	-1.6	0	0	1	0.901	0.701	Cluster2
634	1429660_s_at	BI684556	structural_maintenance_of_chromosomes_2	Smc2	-1.8	0	0	1	0.907	0.702	Cluster2
635	1428033_at	BC028643	zinc_finger_protein_937	Zfp937	-1.8	0	0	1	0.878	0.696	Cluster2
636	1456874_at	BB817332	fibronectin_leucine_rich_transmembrane_protein_2	Flrt2	-1.8	0	0	1	0.95	0.71	Cluster2
637	1457772_at	BB219489	---	---	-1.6	0	0	1	0.927	0.706	Cluster2
638	1439774_at	BB051738	paired_related_homeobox_1	Prrx1	-1.7	0	0	1	0.898	0.7	Cluster2
639	1445854_at	BB380166	RIKEN_cDNA_C230004F18_gene	C230004F18Rik	-1.7	0	0	1	0.929	0.706	Cluster2
640	1457490_at	BB304331	---	---	-1.7	0	0	1	0.835	0.685	Cluster2
641	1426002_a_at	AB018574	cell_division_cycle_7_(S._cerevisiae)	Cdc7	-2	0	0	1	0.88	0.696	Cluster2
642	1439105_at	BE200391	cytidine_and_dCMP_deaminase_domain_containing_1	Cdadc1	-1.8	0	0	1	0.86	0.691	Cluster2
643	1447064_at	AU040379	---	---	-1.6	0	0	1	0.867	0.693	Cluster2
644	1448891_at	BC016551	Fc_receptor-like_S,_scavenger_receptor	Fcrls	-2.2	0	0	1	0.888	0.698	Cluster2
645	1436246_at	AI849504	---	---	-1.8	0	0	1	0.879	0.696	Cluster2
646	1455687_at	BB376918	intestinal_cell_kinase	Ick	-1.6	0	0	-1	0.837	0.685	Cluster2
647	1426960_a_at	BM118638	fatty_acid_2-hydroxylase	Fa2h	-1.7	0	0	-1	0.896	0.7	Cluster2
648	1443744_at	BM942899	---	---	-1.7	0	0	-1	0.909	0.702	Cluster2
649	1437983_at	BB739342	sal-like_1_(Drosophila)	Sall1	-1.8	0	0	-1	0.927	0.706	Cluster2
650	1442393_at	BB488200	---	---	-1.6	0	0	-1	0.938	0.708	Cluster2
651	1442221_at	BE956787	---	---	-1.9	0	0	-1	0.913	0.703	Cluster2
652	1431381_at	AA611589	RIKEN_cDNA_3110005L24_gene	3110005L24Rik	-1.6	0	0	-1	0.958	0.712	Cluster2
653	1449030_at	NM_013681	synapsin_II	Syn2	-1.7	0	0	-1	0.973	0.716	Cluster2
654	1456264_at	BB068454	COMM_domain_containing_7	Commd7	-1.7	0	0	-1	0.948	0.71	Cluster2
655	1453983_a_at	BC003467	methyltransferase_like_16	Mettl16	-1.8	0	0	-1	0.965	0.714	Cluster2
656	1425468_at	BB768495	proteolipid_protein_(myelin)_1	Plp1	-1.6	0	0	-1	0.95	0.71	Cluster2
657	1460400_at	AK007793	spastin	Spast	-1.6	0	0	-1	0.956	0.712	Cluster2
658	1429658_a_at	BI684556	structural_maintenance_of_chromosomes_2	Smc2	-1.8	0	0	-1	0.98	0.718	Cluster2
659	1441065_at	BB305753	---	---	-1.7	0	0	-1	0.961	0.713	Cluster2
660	1435937_at	BB794710	serine_palmitoyltransferase,_long_chain_base_subunit_2	Sptlc2	-1.8	0	0	-1	0.987	0.719	Cluster2
661	1441502_at	BB183114	---	---	-1.6	0	0	-1	0.991	0.72	Cluster2
662	1457156_at	BB245038	TRH-degrading_enzyme	Trhde	-1.6	0	0	-1	0.988	0.719	Cluster2
663	1437518_at	BM203642	predicted_gene_2694	Gm2694	-3.7	0	0	-1	0.991	0.72	Cluster2
664	1455608_at	BB700774	sodium_channel_and_clathrin_linker_1	Sclt1	-1.6	0	0	1	0.996	0.721	Cluster2
665	1434070_at	AV359819	jagged_1	Jag1	-1.6	0	0	1	0.997	0.721	Cluster2
666	1460482_at	AW123948	RIKEN_cDNA_3110047P20_gene	3110047P20Rik	-1.7	0	0	1	0.901	0.701	Cluster2
667	1443163_at	BB049001	solute_carrier_family_39_(zinc_transporter),_member_2	Slc39a2	-1.8	0	0	1	0.909	0.702	Cluster2
668	1435888_at	AV369812	epidermal_growth_factor_receptor	Egfr	-1.8	0	0	1	0.918	0.704	Cluster2
669	1458412_at	BB334511	zinc_finger_protein_78	Zfp78	-1.6	0	0	1	0.923	0.705	Cluster2
670	1434606_at	BF140685	v-erb-b2_erythroblastic_leukemia_viral_oncogene_homolog_3_(avian)	Erbb3	-2.3	0	0	1	0.928	0.706	Cluster2
671	1435271_at	BB162503	interferon_regulatory_factor_3	Irf3	-1.7	0	0	1	0.959	0.712	Cluster2
672	1436240_at	BM211445	RIKEN_cDNA_B230214O09_gene	B230214O09Rik	-1.8	0	0	1	0.969	0.715	Cluster2
673	1460159_at	BB372805	myb-like,_SWIRM_and_MPN_domains_1	Mysm1	-1.9	0	0	1	0.977	0.717	Cluster2
674	1454945_at	BB541889	centrosomal_protein_97	Cep97	-2	0	0	1	0.957	0.712	Cluster2
675	1435286_at	BB304438	Eph_receptor_A5	Epha5	-1.6	0	0	1	0.932	0.707	Cluster2
676	1438613_at	BB131475	potassium_voltage-gated_channel,_shaker-related_subfamily,_member_4	Kcna4	-1.6	0	0	1	0.952	0.711	Cluster2
677	1445617_at	BM207422	---	---	-2.4	0	0	1	0.968	0.715	Cluster2
678	1437307_at	BG069815	SUMO/sentrin_specific_peptidase_8	Senp8	-2.3	0	0	1	0.972	0.716	Cluster2
679	1424504_at	BC006596	RAB22A,_member_RAS_oncogene_family	Rab22a	-1.7	0	0	1	0.98	0.718	Cluster2
680	1441187_at	BB070287	RIKEN_cDNA_E330037M01_gene	E330037M01Rik	-1.8	0	0	1	0.974	0.716	Cluster2
681	1426513_at	BM228459	RNA_binding_motif_protein_28	Rbm28	-1.6	0	0	1.1	0.027	0.202	Cluster2
682	1438444_at	AV381832	serine_peptidase_inhibitor,_Kazal_type_10	Spink10	-2	0	0	1.2	0.08	0.315	Cluster2
683	1445342_at	AV338249	---	---	-1.6	0	0	1.1	0.042	0.246	Cluster2
684	1442628_at	BB350720	---	---	-1.6	0	0	1.1	0.024	0.193	Cluster2
685	1456238_at	BB800442	zinc_finger_protein_133,_pseudogene	Zfp133-ps	-1.8	0	0	1.1	0.258	0.472	Cluster2
686	1458264_at	AW046200	expressed_sequence_AW046200	AW046200	-2.5	0	0	1.1	0.28	0.485	Cluster2
687	1451799_at	BC025545	coiled-coil_domain_containing_25	Ccdc25	-1.9	0	0	1.1	0.319	0.506	Cluster2
688	1435905_at	BE691021	family_with_sequence_similarity_48,_member_A	Fam48a	-2.2	0	0	1.1	0.291	0.491	Cluster2
689	1433650_at	BB194588	hydroxyacylglutathione_hydrolase-like	Haghl	-1.8	0	0	1.1	0.489	0.581	Cluster2
690	1453565_at	AV221509	NADH_dehydrogenase_(ubiquinone)_1,_alpha/beta_subcomplex,_1	Ndufab1	-1.8	0	0	1	0.334	0.514	Cluster2
691	1418311_at	NM_022014	fructosamine_3_kinase	Fn3k	-1.7	0	0	1.1	0.378	0.535	Cluster2
692	1440397_at	BB464523	calcium_channel,_voltage-dependent,_alpha2/delta_subunit_1	Cacna2d1	-1.9	0	0	1.1	0.338	0.516	Cluster2
693	1436045_at	AV377349	testis_specific_10	Tsga10	-2.3	0	0	1.1	0.191	0.428	Cluster2
694	1434389_at	BQ176656	son_of_sevenless_homolog_1_(Drosophila)	Sos1	-1.6	0	0	1	0.315	0.504	Cluster2
695	1454084_a_at	AK018606	SUMO/sentrin_specific_peptidase_8	Senp8	-1.8	0	0	1.1	0.438	0.562	Cluster2
696	1434291_a_at	AA709993	small_EDRK-rich_factor_1	Serf1	-1.6	0	0	1	0.47	0.574	Cluster2
697	1460085_at	BG072896	---	---	-1.8	0	0	1.1	0.256	0.471	Cluster2
698	1432130_a_at	BC021448	tetratricopeptide_repeat_domain_14	Ttc14	-2.1	0	0	1.1	0.557	0.605	Cluster2
699	1442830_at	BM936379	nucleolar_and_spindle_associated_protein_1	Nusap1	-1.8	0	0	1.1	0.333	0.513	Cluster2
700	1455690_at	BE956288	---	---	-1.6	0	0	1	0.452	0.568	Cluster2
701	1445387_at	BM118663	SUMO/sentrin_specific_peptidase_6	Senp6	-1.7	0	0	1	0.422	0.556	Cluster2
702	1446771_at	BB047533	tubulin,_alpha_8	Tuba8	-2	0	0	1	0.453	0.568	Cluster2
703	1438962_s_at	BB469965	DEAD/H_(Asp-Glu-Ala-Asp/His)_box_polypeptide_31	Ddx31	-1.7	0	0	1	0.525	0.594	Cluster2
704	1437950_at	BB818275	family_with_sequence_similarity_149,_member_A	Fam149a	-1.6	0	0	1	0.385	0.539	Cluster2
705	1442207_at	BB283202	autophagy_related_16-like_2_(S._cerevisiae)	Atg16l2	-1.6	0	0	1	0.698	0.65	Cluster2
706	1421379_at	AF184112	zinc_finger_protein_354B	Zfp354b	-1.6	0	0	1	0.601	0.622	Cluster2
707	1434618_at	AA123443	CREB/ATF_bZIP_transcription_factor	Crebzf	-2.2	0	0	1	0.724	0.657	Cluster2
708	1440219_at	BG075356	---	---	-1.6	0	0	1	0.799	0.676	Cluster2
709	1427411_s_at	BB812902	deleted_in_lymphocytic_leukemia,_2	Dleu2	-2.1	0	0	1	0.716	0.654	Cluster2
710	1435158_at	BB796313	RNA_binding_motif_protein_12B	Rbm12b	-1.7	0	0	1	0.722	0.656	Cluster2
711	1456023_at	AV377052	zinc_finger_protein_846	Zfp846	-1.6	0	0	1	0.835	0.685	Cluster2
712	1428052_a_at	BC027750	zinc_finger,_MYM_domain_containing_1	Zmym1	-1.7	0	0	1	0.809	0.679	Cluster2
713	1442886_at	BB667153	---	---	-1.9	0	0	1	0.781	0.672	Cluster2
714	1423723_s_at	BC012873	TAR_DNA_binding_protein	Tardbp	-2.1	0	0	1	0.733	0.659	Cluster2
715	1442733_at	BE848415	RIKEN_cDNA_4922501C03_gene	4922501C03Rik	-1.6	0	0	1	0.852	0.689	Cluster2
716	1445385_at	BB551855	---	---	-1.6	0	0	1.1	0.027	0.205	Cluster2
717	1436279_at	AV292356	solute_carrier_family_26,_member_7	Slc26a7	-1.6	0.001	0.002	1.1	0.358	0.527	Cluster2
718	1455919_at	AV330588	---	---	-1.6	0	0	1.1	0.076	0.308	Cluster2
719	1439143_at	BB312992	RIKEN_cDNA_A930018M24_gene	A930018M24Rik	-1.7	0	0	1.1	0.287	0.489	Cluster2
720	1443564_at	C77185	predicted_gene_7969	Gm7969	-1.6	0	0	1.1	0.074	0.304	Cluster2
721	1427371_at	BC026496	ATP-binding_cassette,_sub-family_A_(ABC1),_member_8a	Abca8a	-1.7	0	0	1.1	0.052	0.269	Cluster2
722	1439302_at	AV266743	ubiquitin-like_modifier_activating_enzyme_6	Uba6	-1.7	0	0	1.1	0.154	0.396	Cluster2
723	1429058_at	AK003403	transmembrane_protein_107	Tmem107	-1.8	0	0	1.1	0.175	0.416	Cluster2
724	1452312_at	BC022909	RIKEN_cDNA_2810002D19_gene	2810002D19Rik	-1.7	0	0	1.1	0.139	0.383	Cluster2
725	1442077_at	BB197581	RIKEN_cDNA_2310076G05_gene	2310076G05Rik	-1.6	0	0	1.1	0.184	0.424	Cluster2
726	1455444_at	BB339336	gamma-aminobutyric_acid_(GABA)_A_receptor,_subunit_alpha_2	Gabra2	-2.2	0	0	1.1	0.133	0.377	Cluster2
727	1437212_at	BB305334	zinc_finger_protein_420	Zfp420	-1.7	0	0	1.1	0.398	0.545	Cluster2
728	1422748_at	NM_015753	zinc_finger_E-box_binding_homeobox_2	Zeb2	-1.7	0	0	1.1	0.262	0.474	Cluster2
729	1434793_at	AI851014	WD_repeat_domain_78	Wdr78	-1.7	0	0	1.1	0.324	0.509	Cluster2
730	1430589_at	AK020902	phosphatidylinositol_glycan_anchor_biosynthesis,_class_H	Pigh	-1.7	0	0	1.1	0.354	0.525	Cluster2
731	1428748_at	BM202530	zinc_finger_protein_826	Zfp826	-2	0	0	1.1	0.461	0.571	Cluster2
732	1439711_at	BB310344	---	---	-1.6	0	0	1	0.397	0.545	Cluster2
733	1423841_at	BC014832	BRX1,_biogenesis_of_ribosomes,_homolog_(S._cerevisiae)	Brix1	-2	0	0	1.1	0.048	0.261	Cluster2
734	1429879_at	AK003575	RIKEN_cDNA_0610037L13_gene	0610037L13Rik	-1.7	0	0	1.1	0.186	0.425	Cluster2
735	1455298_at	BB306828	---	---	-1.6	0	0	1.1	0.04	0.242	Cluster2
736	1438102_at	AV271714	SUMO/sentrin_specific_peptidase_8	Senp8	-1.8	0	0	1.1	0.238	0.46	Cluster2
737	1419179_at	NM_025299	thioredoxin-like_4A	Txnl4a	-1.6	0	0	1.1	0.323	0.508	Cluster2
738	1430485_at	AW324327	transient_receptor_potential_cation_channel,_subfamily_C,_member_2	Trpc2	-1.6	0	0	1.1	0.513	0.59	Cluster2
739	1435806_at	BB045538	UTP23,_small_subunit_(SSU)_processome_component,_homolog_(yeast)	Utp23	-1.6	0	0	1.1	0.311	0.502	Cluster2
740	1455373_at	BE650990	piccolo_(presynaptic_cytomatrix_protein)	Pclo	-1.6	0	0	1	0.342	0.518	Cluster2
741	1436072_at	BG070468	zinc_finger_protein_826	Zfp826	-1.6	0	0	1.1	0.384	0.538	Cluster2
742	1460645_at	NM_025844	cysteine_and_histidine-rich_domain_(CHORD)-containing,_zinc-binding_protein_1	Chordc1	-2.1	0	0	1.1	0.222	0.449	Cluster2
743	1442182_at	AV256803	DnaJ_(Hsp40)_homolog,_subfamily_C,_member_19_///_predicted_gene_15118	Dnajc19_///_Gm15118	-1.9	0	0	1.1	0.371	0.532	Cluster2
744	1431201_at	BB659415	solute_carrier_family_25,_member_27	Slc25a27	-1.6	0	0	1	0.457	0.57	Cluster2
745	1436501_at	BB747681	mitochondrial_tumor_suppressor_1	Mtus1	-1.6	0	0	1	0.629	0.63	Cluster2
746	1420478_at	BG064031	nucleosome_assembly_protein_1-like_1	Nap1l1	-1.6	0	0	1	0.337	0.516	Cluster2
747	1458820_at	AV300514	zinc_finger_protein_560	Zfp560	-1.8	0	0	1.1	0.598	0.62	Cluster2
748	1439790_at	BE686716	serine_(or_cysteine)_peptidase_inhibitor,_clade_B,_member_9	Serpinb9	-1.1	0.27	0.166	1.7	0	0.001	Cluster2
749	1449175_at	NM_008152	G-protein_coupled_receptor_65	Gpr65	3.6	0	0	1.4	0	0.001	Cluster3
750	1419874_x_at	AA419994	zinc_finger_and_BTB_domain_containing_16	Zbtb16	1.9	0	0	1.2	0.001	0.021	Cluster3
751	1422875_at	NM_013489	CD84_antigen	Cd84	2	0	0	1.2	0.02	0.18	Cluster3
752	1425287_at	BC021326	zinc_finger_protein_189	Zfp189	1.6	0	0	1.1	0.023	0.192	Cluster3
753	1447813_x_at	AV247013	src-like_adaptor	Sla	1.7	0	0	1.1	0.045	0.254	Cluster3
754	1417976_at	NM_007398	adenosine_deaminase	Ada	2.7	0	0	1.2	0.008	0.116	Cluster3
755	1444048_at	AI666576	---	---	1.7	0	0	1.1	0.187	0.426	Cluster3
756	1444414_at	BI133499	---	---	5.3	0	0	1.3	0.001	0.034	Cluster3
757	1436222_at	AW547050	growth_arrest_specific_5	Gas5	2	0	0	1.1	0.025	0.197	Cluster3
758	1444018_at	BB794854	RIKEN_cDNA_B930098A02_gene_///_cysteine-rich_hydrophobic_domain_2	B930098A02Rik_///_Chic2	1.6	0	0	1.1	0.275	0.482	Cluster3
759	1415806_at	NM_008872	plasminogen_activator,_tissue	Plat	1.9	0	0	1.1	0.058	0.279	Cluster3
760	1419113_at	NM_007455	adaptor_protein_complex_AP-1,_gamma_2_subunit	Ap1g2	1.6	0	0	1.1	0.199	0.434	Cluster3
761	1425119_at	BC012877	2'-5'_oligoadenylate_synthetase_1B	Oas1b	1.6	0	0	1.1	0.078	0.312	Cluster3
762	1418770_at	NM_013486	CD2_antigen	Cd2	1.8	0	0	1.1	0.315	0.504	Cluster3
763	1424339_at	AB067533	2'-5'_oligoadenylate_synthetase-like_1	Oasl1	2.6	0	0	1.2	0.084	0.321	Cluster3
764	1441799_at	AI098139	RIKEN_cDNA_6030422H21_gene	6030422H21Rik	6	0	0	1.2	0.021	0.184	Cluster3
765	1428057_a_at	BC028439	AHNAK_nucleoprotein_(desmoyokin)	Ahnak	1.6	0	0	1.1	0.233	0.457	Cluster3
766	1452068_at	BI106821	N-acylethanolamine_acid_amidase	Naaa	1.6	0	0	1.1	0.179	0.42	Cluster3
767	1459741_x_at	AW108044	uncoupling_protein_2_(mitochondrial,_proton_carrier)	Ucp2	2	0	0	1.1	0.095	0.336	Cluster3
768	1448276_at	NM_053082	tetraspanin_4	Tspan4	2.5	0	0	1.1	0.239	0.461	Cluster3
769	1423660_at	BB294133	CTD_(carboxy-terminal_domain,_RNA_polymerase_II,_polypeptide_A)_small_phosphatase_2	Ctdsp2	1.7	0	0	1	0.603	0.622	Cluster3
770	1420592_a_at	NM_023210	acidic_(leucine-rich)_nuclear_phosphoprotein_32_family,_member_E	Anp32e	1.6	0	0	1	0.5	0.586	Cluster3
771	1436769_at	AV101011	proteasome_(prosome,_macropain)_subunit,_alpha_type_1	Psma1	1.9	0	0	1	0.644	0.635	Cluster3
772	1437419_at	BB329439	BMP2_inducible_kinase	Bmp2k	2	0	0	1	0.445	0.565	Cluster3
773	1436770_x_at	AV101011	proteasome_(prosome,_macropain)_subunit,_alpha_type_1	Psma1	1.7	0	0	1	0.744	0.662	Cluster3
774	1418043_at	BB436535	ATP-binding_cassette,_sub-family_C_(CFTR/MRP),_member_5	Abcc5	2.3	0	0	1	0.79	0.674	Cluster3
775	1444939_at	BB388769	PRP19/PSO4_pre-mRNA_processing_factor_19_homolog_(S._cerevisiae)	Prpf19	1.6	0	0	1	0.813	0.68	Cluster3
776	1417256_at	NM_008607	matrix_metallopeptidase_13	Mmp13	1.6	0.001	0.001	1	0.858	0.691	Cluster3
777	1429651_at	AV339670	phosphatase_and_actin_regulator_3	Phactr3	1.6	0	0	1	0.46	0.571	Cluster3
778	1440311_at	BB259710	sorbin_and_SH3_domain_containing_1	Sorbs1	2	0	0	1	0.6	0.621	Cluster3
779	1425023_at	BM936366	ubiquitin_specific_peptidase_3	Usp3	1.6	0	0	1	0.71	0.654	Cluster3
780	1436531_at	BB447764	methionine_aminopeptidase_2	Metap2	1.7	0	0	1.1	0.244	0.464	Cluster3
781	1419532_at	NM_010555	interleukin_1_receptor,_type_II	Il1r2	2.3	0	0	1.1	0.484	0.579	Cluster3
782	1416129_at	NM_133753	ERBB_receptor_feedback_inhibitor_1	Errfi1	1.8	0	0	1	0.29	0.491	Cluster3
783	1426464_at	W13191	nuclear_receptor_subfamily_1,_group_D,_member_1	Nr1d1	1.6	0	0	1	0.599	0.621	Cluster3
784	1420819_at	NM_009192	src-like_adaptor	Sla	1.7	0	0	1	0.428	0.558	Cluster3
785	1424838_at	BC005730	RIKEN_cDNA_A330049M08_gene	A330049M08Rik	1.6	0	0	1	0.624	0.629	Cluster3
786	1437924_at	BM244966	Son_DNA_binding_protein	Son	1.8	0	0	1	0.559	0.606	Cluster3
787	1457451_at	BB199213	---	---	2.2	0	0	1	0.649	0.637	Cluster3
788	1416623_at	NM_013691	thrombospondin_3	Thbs3	1.7	0	0	1	0.682	0.647	Cluster3
789	1424737_at	BC009165	thyroid_hormone_responsive_SPOT14_homolog_(Rattus)	Thrsp	2.1	0	0	1.1	0.041	0.243	Cluster3
790	1435803_a_at	BM120823	eukaryotic_translation_initiation_factor_4E_member_2	Eif4e2	1.6	0	0	1.1	0.249	0.466	Cluster3
791	1438593_at	BB369592	Zinc_finger,_matrin-like	Zfml	3.2	0	0	1.2	0.105	0.349	Cluster3
792	1447553_x_at	BB312654	resistance_to_inhibitors_of_cholinesterase_3_homolog_(C._elegans)	Ric3	2.2	0	0	1.1	0.192	0.429	Cluster3
793	1418666_at	NM_008987	pentraxin_related_gene	Ptx3	1.6	0	0	1.1	0.398	0.545	Cluster3
794	1419119_at	AF172930	hematopoietic_cell_signal_transducer	Hcst	1.7	0	0	1.1	0.074	0.305	Cluster3
795	1448256_at	NM_016810	golgi_SNAP_receptor_complex_member_1	Gosr1	1.7	0	0	1.1	0.259	0.472	Cluster3
796	1456302_at	BB252740	peroxisomal_biogenesis_factor_6	Pex6	1.8	0	0	1.1	0.315	0.504	Cluster3
797	1455051_at	BE951781	ring_finger_protein_31	Rnf31	1.6	0	0	1.1	0.297	0.494	Cluster3
798	1440020_at	BB212045	---	---	1.8	0	0	1.1	0.27	0.479	Cluster3
799	1435058_x_at	AI528529	syntaxin_binding_protein_3A	Stxbp3a	1.8	0	0	1.1	0.244	0.464	Cluster3
800	1451601_a_at	BC025823	spinster_homolog_2_(Drosophila)	Spns2	1.8	0	0	1.1	0.098	0.34	Cluster3
801	1445656_at	AW060425	---	---	1.9	0	0	1.1	0.298	0.495	Cluster3
802	1422973_a_at	NM_009381	thyroid_hormone_responsive_SPOT14_homolog_(Rattus)	Thrsp	1.9	0	0	1.1	0.03	0.214	Cluster3
803	1419149_at	NM_008871	serine_(or_cysteine)_peptidase_inhibitor,_clade_E,_member_1	Serpine1	2	0	0	1.1	0.43	0.559	Cluster3
804	1443388_at	BB203418	---	---	1.6	0	0	1.1	0.31	0.502	Cluster3
805	1427029_at	AK008764	HtrA_serine_peptidase_3	Htra3	1.6	0	0	1.1	0.36	0.528	Cluster3
806	1418250_at	NM_025404	ADP-ribosylation_factor-like_4D	Arl4d	2.1	0	0	1.1	0.106	0.35	Cluster3
807	1420919_at	BB768208	serum/glucocorticoid_regulated_kinase_3	Sgk3	2.5	0	0	1.1	0.141	0.385	Cluster3
808	1456347_at	BG065562	---	---	1.7	0	0	1	0.553	0.604	Cluster3
809	1444488_at	BE982890	---	---	1.6	0	0	1	0.55	0.603	Cluster3
810	1438542_at	BB199080	---	---	1.7	0	0	1	0.544	0.601	Cluster3
811	1439349_at	BM239721	strawberry_notch_homolog_2_(Drosophila)	Sbno2	1.6	0	0	1	0.607	0.623	Cluster3
812	1444763_at	BB667296	protein_tyrosine_phosphatase,_receptor_type,_K	Ptprk	2.2	0	0	1	0.656	0.639	Cluster3
813	1416039_x_at	NM_010516	cysteine_rich_protein_61	Cyr61	5.7	0	0	1.1	0.369	0.532	Cluster3
814	1459331_at	BB530856	surfeit_gene_6	Surf6	1.8	0	0	1	0.66	0.64	Cluster3
815	1430357_at	BM241237	H3_histone,_family_3B	H3f3b	1.9	0	0	1	0.604	0.622	Cluster3
816	1457689_at	BB327612	SET_binding_factor_2	Sbf2	1.6	0	0	1	0.733	0.659	Cluster3
817	1432007_s_at	AK009735	adaptor_protein_complex_AP-2,_alpha_2_subunit	Ap2a2	2.1	0	0	1	0.634	0.632	Cluster3
818	1441740_at	BM206839	---	---	1.6	0	0	1	0.784	0.673	Cluster3
819	1420735_at	AF024621	gamma-aminobutyric_acid_(GABA)_C_receptor,_subunit_rho_2	Gabrr2	2.6	0	0	1	0.628	0.63	Cluster3
820	1422788_at	NM_021398	solute_carrier_family_43,_member_3	Slc43a3	1.8	0	0	1	0.795	0.675	Cluster3
821	1429251_at	BM226301	PR_domain_containing_2,_with_ZNF_domain	Prdm2	1.6	0	0	1	0.696	0.65	Cluster3
822	1449249_at	NM_018764	protocadherin_7	Pcdh7	2.2	0	0	1	0.784	0.673	Cluster3
823	1431166_at	BF319155	chromodomain_helicase_DNA_binding_protein_1	Chd1	1.6	0	0	1	0.789	0.674	Cluster3
824	1446587_at	BB205338	---	---	2.6	0	0	1	0.659	0.64	Cluster3
825	1444982_at	BB380551	RIKEN_cDNA_C230007H23_gene	C230007H23Rik	2.5	0	0	1	0.786	0.673	Cluster3
826	1424481_s_at	BC027106	armadillo_repeat_containing,_X-linked_5	Armcx5	2.1	0	0	1	0.791	0.674	Cluster3
827	1453678_at	AK007371	methyl-CpG_binding_domain_protein_1	Mbd1	1.8	0	0	1	0.851	0.689	Cluster3
828	1456706_at	BE628134	RIKEN_cDNA_4833441D16_gene	4833441D16Rik	1.6	0	0	1	0.854	0.689	Cluster3
829	1441946_at	AV239969	inter-alpha_(globulin)_inhibitor_H5	Itih5	1.6	0	0	1	0.855	0.69	Cluster3
830	1424400_a_at	AK007822	aldehyde_dehydrogenase_1_family,_member_L1	Aldh1l1	1.6	0	0	1	0.681	0.646	Cluster3
831	1444708_at	BB486850	transmembrane_protein_29	Tmem29	1.7	0	0	1	0.79	0.674	Cluster3
832	1454197_a_at	AK016771	coiled-coil_domain_containing_86	Ccdc86	1.6	0	0	1	0.751	0.664	Cluster3
833	1440463_at	BB538949	RIKEN_cDNA_5430414B19_gene	5430414B19Rik	1.7	0	0	1	0.868	0.693	Cluster3
834	1451340_at	BC027152	AT_rich_interactive_domain_5A_(MRF1-like)	Arid5a	1.8	0	0	1	0.68	0.646	Cluster3
835	1434912_at	BB545971	resistance_to_inhibitors_of_cholinesterase_3_homolog_(C._elegans)	Ric3	1.9	0	0	1	0.704	0.652	Cluster3
836	1442243_at	BB476794	period_homolog_3_(Drosophila)	Per3	1.7	0	0	1	0.784	0.673	Cluster3
837	1435188_at	BB407125	predicted_gene_129	Gm129	2.2	0	0	1	0.727	0.658	Cluster3
838	1425378_at	BC004027	hect_(homologous_to_the_E6-AP_(UBE3A)_carboxyl_terminus)_domain_and_RCC1_(CHC1)-like_domain_(RLD)_1	Herc1	1.8	0	0	1	0.871	0.694	Cluster3
839	1431696_at	AK014574	predicted_gene_16491	Gm16491	2.1	0	0	1	0.743	0.662	Cluster3
840	1430557_at	BB009682	RIKEN_cDNA_4930434J08_gene	4930434J08Rik	1.6	0	0	1	0.892	0.699	Cluster3
841	1441150_x_at	BB829165	SAM_domain,_SH3_domain_and_nuclear_localization_signals,_1	Samsn1	2.5	0	0	1	0.74	0.661	Cluster3
842	1439552_at	BE985618	triple_functional_domain_(PTPRF_interacting)	Trio	1.8	0	0	1	0.826	0.682	Cluster3
843	1444036_at	BB325197	---	---	2.1	0	0	1	0.865	0.692	Cluster3
844	1444722_at	BG075584	---	---	3.3	0	0	1	0.775	0.67	Cluster3
845	1435034_at	BG076062	RNA_polymerase_II_associated_protein_2	Rpap2	2	0	0	1	0.89	0.698	Cluster3
846	1457384_at	AV252220	---	---	1.8	0	0	1	0.902	0.701	Cluster3
847	1430798_x_at	AV306676	mitochondrial_ribosomal_protein_L15	Mrpl15	4.4	0	0	1	0.788	0.674	Cluster3
848	1442813_at	BB266350	---	---	1.7	0	0	1	0.911	0.703	Cluster3
849	1437813_at	BE948330	absent_in_melanoma_1-like	Aim1l	1.6	0	0	1	0.93	0.706	Cluster3
850	1416146_at	BE912771	heat_shock_protein_4	Hspa4	1.8	0	0	1	0.831	0.684	Cluster3
851	1421336_at	NM_008937	prospero-related_homeobox_1	Prox1	1.6	0	0	1	0.886	0.697	Cluster3
852	1430959_at	AK016052	non-protein_coding_RNA_85	Ncrna00085	2.3	0	0	1	0.905	0.702	Cluster3
853	1456634_at	BB093445	RIKEN_cDNA_9830001H06_gene	9830001H06Rik	1.8	0	0	1	0.918	0.704	Cluster3
854	1416987_at	NM_023876	elongation_protein_4_homolog_(S._cerevisiae)	Elp4	2.1	0	0	1	0.922	0.705	Cluster3
855	1440491_at	BB328290	solute_carrier_family_1_(glial_high_affinity_glutamate_transporter),_member_3	Slc1a3	1.7	0	0	1	0.947	0.71	Cluster3
856	1458677_at	BB517186	ectonucleoside_triphosphate_diphosphohydrolase_5	Entpd5	1.7	0	0	1	0.925	0.705	Cluster3
857	1453265_at	BG066938	RIKEN_cDNA_4930579C15_gene	4930579C15Rik	2	0	0	1	0.928	0.706	Cluster3
858	1453789_at	AI117479	RIKEN_cDNA_4933440N22_gene	4933440N22Rik	1.7	0	0	1	0.931	0.707	Cluster3
859	1440203_at	BB256478	polycomb_group_ring_finger_3	Pcgf3	1.7	0	0	1	0.943	0.709	Cluster3
860	1458403_at	BB222494	TRAF2_and_NCK_interacting_kinase	Tnik	1.8	0	0	1	0.946	0.71	Cluster3
861	1436871_at	BE825013	serine/arginine-rich_splicing_factor_7	Srsf7	3.2	0	0	1	0.944	0.709	Cluster3
862	1438427_at	AV223344	family_with_sequence_similarity_120,_member_B	Fam120b	2.7	0	0	1	0.934	0.707	Cluster3
863	1425179_at	AF237702	serine_hydroxymethyltransferase_1_(soluble)	Shmt1	1.6	0	0	1	0.958	0.712	Cluster3
864	1446269_at	BB399042	high_mobility_group_box_transcription_factor_1	Hbp1	1.9	0	0	1	0.961	0.713	Cluster3
865	1460725_at	NM_011728	xeroderma_pigmentosum,_complementation_group_A	Xpa	1.6	0	0	1	0.955	0.711	Cluster3
866	1442905_at	BB066458	---	---	1.9	0	0	1	0.972	0.716	Cluster3
867	1421249_at	NM_026244	solute_carrier_family_39_(zinc_transporter),_member_9	Slc39a9	1.8	0	0	1	0.982	0.718	Cluster3
868	1416653_at	NM_011504	syntaxin_binding_protein_3A	Stxbp3a	1.7	0	0	1	0.287	0.489	Cluster3
869	1450297_at	NM_031168	interleukin_6	Il6	3.1	0	0	1.1	0.362	0.528	Cluster3
870	1456762_at	BM237714	GTPase,_IMAP_family_member_6	Gimap6	1.8	0	0	1	0.529	0.596	Cluster3
871	1438133_a_at	BM202770	cysteine_rich_protein_61	Cyr61	5.1	0	0	1.2	0.209	0.441	Cluster3
872	1458980_at	BG064153	---	---	1.6	0	0	1	0.534	0.598	Cluster3
873	1419765_at	NM_029402	cullin_2	Cul2	1.9	0	0	1.1	0.225	0.451	Cluster3
874	1457228_x_at	AV251087	GLE1_RNA_export_mediator_(yeast)	Gle1	1.6	0	0	1	0.496	0.584	Cluster3
875	1451780_at	AF068182	B_cell_linker	Blnk	1.6	0	0	1	0.491	0.582	Cluster3
876	1425530_a_at	D29800	syntaxin_3	Stx3	1.6	0	0	1	0.572	0.611	Cluster3
877	1436662_at	BB022723	VPS10_domain_receptor_protein_SORCS_1	Sorcs1	2	0	0	1	0.426	0.558	Cluster3
878	1435206_at	BB767169	solute_carrier_family_24_(sodium/potassium/calcium_exchanger),_member_4	Slc24a4	1.6	0	0	1	0.528	0.595	Cluster3
879	1424344_s_at	BM200591	eukaryotic_translation_initiation_factor_1A	Eif1a	1.6	0	0	1	0.528	0.595	Cluster3
880	1428776_at	AV244484	solute_carrier_family_10_(sodium/bile_acid_cotransporter_family),_member_6	Slc10a6	2.6	0	0	1.1	0.485	0.58	Cluster3
881	1442599_at	BB668140	solute_carrier_family_12_(potassium/chloride_transporters),_member_9	Slc12a9	1.7	0	0	1	0.52	0.592	Cluster3
882	1444112_at	BQ174086	predicted_gene_15417	Gm15417	1.9	0	0	1	0.544	0.601	Cluster3
883	1450989_at	AV294613	teratocarcinoma-derived_growth_factor_1	Tdgf1	1.7	0	0	1	0.77	0.669	Cluster3
884	1438075_at	BB752524	fem-1_homolog_c_(C.elegans)	Fem1c	1.8	0	0	1	0.556	0.605	Cluster3
885	1454409_at	AK014666	RIKEN_cDNA_4833408G04_gene	4833408G04Rik	2.9	0	0	1.1	0.642	0.634	Cluster3
886	1426508_at	BB183081	glial_fibrillary_acidic_protein	Gfap	1.7	0	0	1	0.691	0.649	Cluster3
887	1427941_at	AF430845	dicer_1,_ribonuclease_type_III	Dicer1	1.7	0	0	1	0.664	0.642	Cluster3
888	1454018_at	AK014829	tousled-like_kinase_2_(Arabidopsis)	Tlk2	2.5	0	0	1	0.724	0.656	Cluster3
889	1450531_at	NM_008199	histocompatibility_2,_blastocyst	H2-Bl	1.6	0	0	1	0.721	0.656	Cluster3
890	1434694_at	BM942047	leucine_rich_repeat_containing_8A	Lrrc8a	2.2	0	0	1.2	0.001	0.032	Cluster3
891	1442026_at	AI467657	---	---	1.8	0	0	1.1	0.007	0.107	Cluster3
892	1449937_at	AI528824	endonuclease,_polyU-specific	Endou	1.6	0	0	1.1	0.103	0.347	Cluster3
893	1430097_at	AU016566	RIKEN_cDNA_8430436C05_gene	8430436C05Rik	1.6	0	0	1.1	0.057	0.278	Cluster3
894	1444746_at	BM195033	---	---	1.9	0	0	1.1	0.085	0.322	Cluster3
895	1418166_at	NM_008353	interleukin_12_receptor,_beta_1	Il12rb1	2.8	0	0	1.2	0.017	0.164	Cluster3
896	1448231_at	U16959	FK506_binding_protein_5	Fkbp5	1.9	0	0	1.1	0.032	0.219	Cluster3
897	1422997_s_at	NM_134188	acyl-CoA_thioesterase_1_///_acyl-CoA_thioesterase_2	Acot1_///_Acot2	1.6	0	0	1.1	0.163	0.406	Cluster3
898	1444053_at	BB435780	single-stranded_DNA_binding_protein_1	Ssbp1	2.2	0	0	1.1	0.164	0.407	Cluster3
899	1430575_a_at	BB484264	tripeptidyl_peptidase_II	Tpp2	1.6	0	0	1.1	0.279	0.484	Cluster3
900	1419482_at	NM_009779	complement_component_3a_receptor_1	C3ar1	1.8	0	0	1.1	0.166	0.408	Cluster3
901	1435036_at	BI146987	asparaginase_homolog_(S._cerevisiae)	Aspg	2.6	0	0	1.1	0.205	0.439	Cluster3
902	1440053_at	BB488048	---	---	1.6	0	0	1.1	0.384	0.538	Cluster3
903	1452414_s_at	BB051286	coiled-coil_domain_containing_86	Ccdc86	1.6	0	0	1.1	0.141	0.385	Cluster3
904	1439154_at	BB473634	nucleoporin_98	Nup98	1.6	0	0	1.1	0.141	0.385	Cluster3
905	1453976_at	BB624514	RIKEN_cDNA_4432414F05_gene	4432414F05Rik	2.8	0	0	1.2	0.034	0.226	Cluster3
906	1445557_at	BB807032	RIKEN_cDNA_0610040B10_gene	0610040B10Rik	1.6	0	0	1	0.322	0.508	Cluster3
907	1428823_at	AK009957	HD_domain_containing_2	Hddc2	1.6	0	0	1	0.33	0.511	Cluster3
908	1458812_at	AV251163	---	---	1.6	0	0	1	0.463	0.571	Cluster3
909	1435459_at	BM936480	flavin_containing_monooxygenase_2	Fmo2	1.6	0.003	0.004	1	0.734	0.66	Cluster3
910	1430153_at	AK018223	tropomodulin_2	Tmod2	1.7	0	0	1.2	0.004	0.082	Cluster3
911	1437100_x_at	BB206220	proviral_integration_site_3	Pim3	1.6	0	0	1.1	0.01	0.128	Cluster3
912	1418901_at	NM_009883	CCAAT/enhancer_binding_protein_(C/EBP),_beta	Cebpb	2.4	0	0	1.3	0	0.002	Cluster3
913	1424783_a_at	BC019434	UDP-glucuronosyltransferase_1-9-like_///_UDP-glucuronosyltransferase_1-9-like_///_UDP_glucuronosyltransferase_1_family,_polypeptide_A1_///_UDP_glycosyltransferase_1_family,_polypeptide_A10_///_UDP_glucuronosyltransferase_1_family,_polypeptide_A2_///_UDP_glucuronosyltransferase_1_family,_polypeptide_A5_///_UDP_glucuronosyltransferase_1_family,_polypeptide_A6A_///_UDP_glucuronosyltransferase_1_fami…	LOC100048662_///_LOC100048744_///_Ugt1a1_///_Ugt1a10_///_Ugt1a2_///_Ugt1a5_///_Ugt1a6a_///_Ugt1a6b_///_Ugt1a7c_///_Ugt1a9	3.1	0	0	1.3	0.02	0.177	Cluster3
914	1453332_at	AK012141	RIKEN_cDNA_2410002O22_gene	2410002O22Rik	2	0	0	1.2	0.044	0.251	Cluster3
915	1444122_at	AW556894	synaptonemal_complex_protein_2	Sycp2	1.6	0	0	1.1	0.127	0.373	Cluster3
916	1426501_a_at	BB277065	TRAF-interacting_protein_with_forkhead-associated_domain	Tifa	2.4	0	0	1.3	0	0.011	Cluster3
917	1436263_at	AI839848	myelin-associated_oligodendrocytic_basic_protein	Mobp	3.1	0	0	1.4	0.009	0.123	Cluster3
918	1442025_a_at	AI467657	---	---	2.4	0	0	1.3	0	0.011	Cluster3
919	1423858_a_at	BC014714	3-hydroxy-3-methylglutaryl-Coenzyme_A_synthase_2	Hmgcs2	2.5	0	0	1.3	0.019	0.172	Cluster3
920	1452521_a_at	X62701	plasminogen_activator,_urokinase_receptor	Plaur	2.1	0	0	1.2	0.011	0.131	Cluster3
921	1417601_at	NM_015811	regulator_of_G-protein_signaling_1	Rgs1	2.2	0	0	1.2	0.03	0.214	Cluster3
922	1424393_s_at	BC026584	alcohol_dehydrogenase,_iron_containing,_1	Adhfe1	1.7	0	0	1.1	0.008	0.113	Cluster3
923	1419442_at	BC005429	matrilin_2	Matn2	1.8	0	0	1.1	0.005	0.091	Cluster3
924	1421031_a_at	NM_023516	hypoxia_inducible_lipid_droplet_associated	Hilpda	1.7	0	0	1.1	0.035	0.228	Cluster3
925	1423465_at	BB032852	ferric-chelate_reductase_1	Frrs1	1.6	0	0	1.1	0.057	0.277	Cluster3
926	1417756_a_at	NM_019391	lymphocyte_specific_1	Lsp1	1.6	0	0	1.1	0.071	0.3	Cluster3
927	1442547_at	BB524105	---	---	2.1	0	0	1.2	0.165	0.407	Cluster3
928	1438946_at	BB221015	platelet_derived_growth_factor_receptor,_alpha_polypeptide	Pdgfra	1.7	0	0	1.1	0.144	0.387	Cluster3
929	1435858_at	BE996002	transmembrane_protein_215	Tmem215	1.9	0	0	1.1	0.163	0.406	Cluster3
930	1430035_at	AK018415	coiled-coil_domain_containing_132	Ccdc132	1.8	0	0	1.1	0.072	0.302	Cluster3
931	1456212_x_at	BB831725	suppressor_of_cytokine_signaling_3	Socs3	8	0	0	1.8	0	0.005	Cluster3
932	1443167_at	BB441213	---	---	1.7	0	0	1.2	0.017	0.166	Cluster3
933	1425005_at	AF106008	killer_cell_lectin-like_receptor_subfamily_C,_member_1	Klrc1	2.6	0	0	1.3	0.002	0.055	Cluster3
934	1423396_at	AK018763	angiotensinogen_(serpin_peptidase_inhibitor,_clade_A,_member_8)	Agt	1.8	0	0	1.2	0.014	0.151	Cluster3
935	1460220_a_at	BM233698	colony_stimulating_factor_1_(macrophage)	Csf1	1.6	0	0	1.1	0.001	0.021	Cluster3
936	1422598_at	NM_009813	calsequestrin_1	Casq1	1.8	0	0	1.2	0.005	0.093	Cluster3
937	1456986_at	BB326368	uncharacterized_LOC100504898	LOC100504898	1.6	0	0	1.1	0.058	0.278	Cluster3
938	1452519_a_at	X14678	zinc_finger_protein_36	Zfp36	4.2	0	0	1.4	0.002	0.048	Cluster3
939	1427020_at	BC026446	scavenger_receptor_class_A,_member_3	Scara3	1.9	0	0	1.1	0.012	0.143	Cluster3
940	1421321_a_at	NM_019671	neuroepithelial_cell_transforming_gene_1	Net1	1.8	0	0	1.1	0.076	0.308	Cluster3
941	1460428_at	BC003286	ankyrin_repeat_domain_13a	Ankrd13a	1.7	0	0	1.1	0.006	0.096	Cluster3
942	1458083_at	BG063602	---	---	1.6	0	0	1.1	0.127	0.372	Cluster3
943	1450016_at	BG065754	cyclin_G1	Ccng1	1.6	0	0	1.1	0.23	0.455	Cluster3
944	1427994_at	BM230330	CD300_antigen_like_family_member_F	Cd300lf	2.7	0	0	1.2	0.003	0.067	Cluster3
945	1433859_at	BB207820	INO80_complex_subunit_C	Ino80c	1.6	0	0	1.1	0.12	0.365	Cluster3
946	1429159_at	AK018605	inter-alpha_(globulin)_inhibitor_H5	Itih5	1.7	0	0	1.1	0.133	0.376	Cluster3
947	1419100_at	NM_009252	serine_(or_cysteine)_peptidase_inhibitor,_clade_A,_member_3N	Serpina3n	3.8	0	0	1.2	0.015	0.154	Cluster3
948	1445400_at	BM217870	---	---	2	0	0	1.1	0.046	0.256	Cluster3
949	1426925_at	AA709668	ring_finger_and_CCCH-type_zinc_finger_domains_2	Rc3h2	2.1	0	0	1.1	0.129	0.374	Cluster3
950	1418872_at	NM_011075	ATP-binding_cassette,_sub-family_B_(MDR/TAP),_member_1B	Abcb1b	1.6	0	0	1.1	0.288	0.489	Cluster3
951	1439684_at	BB428007	RIKEN_cDNA_4930570G19_gene	4930570G19Rik	1.8	0	0	1.1	0.352	0.524	Cluster3
952	1443721_x_at	BF148215	strawberry_notch_homolog_2_(Drosophila)	Sbno2	2	0	0	1.1	0.313	0.503	Cluster3
953	1451431_a_at	BC019947	dysbindin_(dystrobrevin_binding_protein_1)_domain_containing_2	Dbndd2	1.7	0	0	1.1	0.018	0.171	Cluster3
954	1442044_at	BM242890	---	---	1.6	0	0	1.1	0.322	0.508	Cluster3
955	1433455_at	AW536901	SH2B_adaptor_protein_3	Sh2b3	1.6	0	0	1.1	0.15	0.393	Cluster3
956	1442340_x_at	BB533736	cysteine_rich_protein_61	Cyr61	2.4	0	0	1.1	0.352	0.524	Cluster3
957	1428588_a_at	BF134369	mitochondrial_ribosomal_protein_L41	Mrpl41	1.8	0	0	1.1	0.109	0.353	Cluster3
958	1453851_a_at	AK007410	growth_arrest_and_DNA-damage-inducible_45_gamma	Gadd45g	2.3	0	0	1.1	0.085	0.322	Cluster3
959	1429642_at	AK012639	zinc_finger,_AN1-type_domain_4	Zfand4	2.8	0	0	1.1	0.164	0.406	Cluster3
960	1452729_at	BE446919	dolichyl-phosphate_mannosyltransferase_polypeptide_3	Dpm3	1.7	0	0	1	0.513	0.59	Cluster3
961	1430430_at	AK018073	EGF-like_and_EMI_domain_containing_1	Egfem1	1.6	0	0	1	0.553	0.604	Cluster3
962	1420150_at	AI596360	splA/ryanodine_receptor_domain_and_SOCS_box_containing_1	Spsb1	1.9	0	0	1.1	0.313	0.503	Cluster3
963	1419456_at	BC012247	dicarbonyl_L-xylulose_reductase	Dcxr	1.6	0	0	1	0.386	0.539	Cluster3
964	1453402_at	AV338754	RIKEN_cDNA_6430500C12_gene	6430500C12Rik	1.7	0	0	1	0.434	0.561	Cluster3
965	1457961_at	BB713538	lysophosphatidylglycerol_acyltransferase_1	Lpgat1	1.6	0	0	1	0.644	0.635	Cluster3
966	1444749_at	BB427399	---	---	9.6	0	0	1.4	0	0.009	Cluster3
967	1426170_a_at	U34882	CD8_antigen,_beta_chain_1	Cd8b1	2	0	0	1.1	0.075	0.307	Cluster3
968	1451905_a_at	M21039	myxovirus_(influenza_virus)_resistance_1	Mx1	3.6	0	0	1.2	0.227	0.452	Cluster3
969	1428352_at	AW542672	arrestin_domain_containing_2	Arrdc2	4.8	0	0	1.4	0.001	0.032	Cluster3
970	1416067_at	NM_013562	interferon-related_developmental_regulator_1	Ifrd1	1.7	0	0	1.1	0.007	0.109	Cluster3
971	1425166_at	U27178	retinoblastoma-like_1_(p107)	Rbl1	1.6	0	0	1.1	0.151	0.394	Cluster3
972	1421679_a_at	NM_007669	cyclin-dependent_kinase_inhibitor_1A_(P21)	Cdkn1a	5.1	0	0	1.3	0.003	0.064	Cluster3
973	1426509_s_at	BB183081	glial_fibrillary_acidic_protein	Gfap	1.9	0	0	1.1	0.251	0.467	Cluster3
974	1459740_s_at	AW108044	uncoupling_protein_2_(mitochondrial,_proton_carrier)	Ucp2	3	0	0	1.2	0.042	0.246	Cluster3
975	1419093_at	AI098840	tryptophan_2,3-dioxygenase	Tdo2	2.2	0	0	1.1	0.499	0.585	Cluster3
976	1448188_at	BC012697	uncoupling_protein_2_(mitochondrial,_proton_carrier)	Ucp2	2.2	0	0	1.1	0.041	0.243	Cluster3
977	1456750_at	BB308463	RIKEN_cDNA_B230303O12_gene	B230303O12Rik	1.8	0	0	1.1	0.272	0.48	Cluster3
978	1456563_at	BB769119	---	---	1.6	0	0	1.1	0.238	0.46	Cluster3
979	1448239_at	NM_010442	heme_oxygenase_(decycling)_1	Hmox1	3	0	0	1.2	0.173	0.415	Cluster3
980	1437658_a_at	AW552536	small_nucleolar_RNA_host_gene_(non-protein_coding)_1	Snhg1	2.2	0	0	1.1	0.052	0.269	Cluster3
981	1459434_at	BM238649	---	---	1.9	0	0	1.1	0.117	0.361	Cluster3
982	1444681_at	BB749686	ELKS/RAB6-interacting/CAST_family_member_2	Erc2	4.4	0	0	1.2	0.143	0.386	Cluster3
983	1424690_at	BB231173	calcium_channel_flower_domain_containing_1	Cacfd1	1.6	0	0	1.1	0.445	0.565	Cluster3
984	1429050_at	AK015681	cysteine-rich_hydrophobic_domain_2	Chic2	2	0	0	1.1	0.237	0.459	Cluster3
985	1440459_at	BB767941	senataxin	Setx	2.1	0	0	1.1	0.418	0.554	Cluster3
986	1441445_at	AW553065	period_homolog_3_(Drosophila)	Per3	1.9	0	0	1.1	0.207	0.44	Cluster3
987	1426677_at	BM233746	filamin,_alpha	Flna	1.6	0	0	1	0.322	0.508	Cluster3
988	1443983_at	BB218653	---	---	1.7	0	0	1.1	0.394	0.542	Cluster3
989	1453330_at	AK002458	coiled-coil_domain_containing_88C	Ccdc88c	1.6	0	0	1	0.51	0.589	Cluster3
990	1444564_at	AV332635	apolipoprotein_D	Apod	8.3	0	0	1.5	0.001	0.039	Cluster3
991	1437495_at	AV272026	membrane-bound_transcription_factor_peptidase,_site_2_///_Yy2_transcription_factor	Mbtps2_///_Yy2	1.6	0	0	1.1	0.168	0.41	Cluster3
992	1433501_at	BG230336	cathepsin_O	Ctso	1.6	0	0	1.1	0.104	0.348	Cluster3
993	1456945_at	BB043522	nudix_(nucleoside_diphosphate_linked_moiety_X)-type_motif_6	Nudt6	1.6	0	0	1.1	0.217	0.447	Cluster3
994	1449901_a_at	NM_016693	mitogen-activated_protein_kinase_kinase_kinase_6	Map3k6	2.9	0	0	1.2	0.003	0.065	Cluster3
995	1444078_at	BB154331	CD8_antigen,_alpha_chain	Cd8a	1.7	0	0	1.1	0.229	0.454	Cluster3
996	1417395_at	BG069413	Kruppel-like_factor_4_(gut)	Klf4	1.6	0	0	1.1	0.42	0.555	Cluster3
997	1426210_x_at	BC014870	poly_(ADP-ribose)_polymerase_family,_member_3	Parp3	3.8	0	0	1.4	0	0.021	Cluster3
998	1429436_at	BB626803	PRP40_pre-mRNA_processing_factor_40_homolog_A_(yeast)	Prpf40a	1.6	0	0	1.1	0.062	0.286	Cluster3
999	1418014_a_at	NM_022305	UDP-Gal:betaGlcNAc_beta_1,4-_galactosyltransferase,_polypeptide_1	B4galt1	1.9	0	0	1.2	0.001	0.033	Cluster3
1000	1429379_at	AV124537	lymphatic_vessel_endothelial_hyaluronan_receptor_1	Lyve1	3.3	0	0	1.4	0	0.016	Cluster3
1001	1425428_at	AF416641	hypoxia_inducible_factor_3,_alpha_subunit	Hif3a	1.7	0	0	1.1	0.022	0.185	Cluster3
1002	1458308_at	BF148215	strawberry_notch_homolog_2_(Drosophila)	Sbno2	2.7	0	0	1.3	0.073	0.303	Cluster3
1003	1417785_at	NM_134102	phospholipase_A1_member_A	Pla1a	3.2	0	0	1.3	0.004	0.08	Cluster3
1004	1420963_at	BE979942	hyaluronan_and_proteoglycan_link_protein_2	Hapln2	1.8	0	0	1.2	0.01	0.13	Cluster3
1005	1457035_at	AI607873	expressed_sequence_AI607873	AI607873	4.7	0	0	1.5	0.003	0.073	Cluster3
1006	1440291_at	BE954335	---	---	1.6	0	0	1.1	0.099	0.341	Cluster3
1007	1422645_at	AJ306425	hemochromatosis	Hfe	1.8	0	0	1.2	0.004	0.077	Cluster3
1008	1418091_at	NM_023755	transcription_factor_CP2-like_1	Tfcp2l1	1.8	0	0	1.2	0.037	0.235	Cluster3
1009	1451612_at	BC027262	metallothionein_1	Mt1	2.8	0	0	1.3	0.003	0.065	Cluster3
1010	1450850_at	BM119387	ezrin	Ezr	1.9	0	0	1.2	0	0.019	Cluster3
1011	1438716_at	BG068242	tripartite_motif-containing_30D	Trim30d	1.9	0	0	1.2	0.055	0.273	Cluster3
1012	1415975_at	AU080787	calcium_regulated_heat_stable_protein_1	Carhsp1	1.6	0	0	1.1	0.004	0.08	Cluster3
1013	1435999_at	BB284475	serine_peptidase_inhibitor,_Kazal_type_8	Spink8	1.8	0	0	1.1	0.028	0.206	Cluster3
1014	1449123_at	NM_008407	inter-alpha_trypsin_inhibitor,_heavy_chain_3	Itih3	1.7	0	0	1.1	0.122	0.367	Cluster3
1015	1424942_a_at	BC006728	myelocytomatosis_oncogene	Myc	1.7	0	0	1.1	0.084	0.321	Cluster3
1016	1422789_at	NM_009022	aldehyde_dehydrogenase_family_1,_subfamily_A2	Aldh1a2	1.7	0	0	1.1	0.218	0.447	Cluster3
1017	1442381_at	BG068971	---	---	1.9	0	0	1.1	0.03	0.215	Cluster3
1018	1450842_a_at	AV132173	centromere_protein_A	Cenpa	2.4	0	0	1.2	0.305	0.499	Cluster3
1019	1416602_a_at	NM_011236	RAD52_homolog_(S._cerevisiae)	Rad52	1.6	0	0	1.1	0.076	0.308	Cluster3
1020	1443937_at	BE634648	---	---	1.6	0	0	1.1	0.201	0.436	Cluster3
1021	1448503_at	BC003839	myeloid_cell_leukemia_sequence_1	Mcl1	2.2	0	0	1.2	0.006	0.101	Cluster3
1022	1416576_at	NM_007707	suppressor_of_cytokine_signaling_3	Socs3	3	0	0	1.2	0.104	0.348	Cluster3
1023	1460227_at	BC008107	tissue_inhibitor_of_metalloproteinase_1	Timp1	1.9	0	0	1.1	0.229	0.454	Cluster3
1024	1452534_a_at	X67668	high_mobility_group_box_2	Hmgb2	4.3	0	0	1.3	0.01	0.129	Cluster3
1025	1451325_at	BC010204	forty-two-three_domain_containing_1	Fyttd1	1.6	0	0	1.1	0.25	0.467	Cluster3
1026	1424090_at	BC005556	syndecan_binding_protein_(syntenin)_2	Sdcbp2	2	0	0	1.1	0.002	0.058	Cluster3
1027	1457321_at	BE630574	RIKEN_cDNA_D130037M23_gene	D130037M23Rik	2.4	0	0	1.2	0.046	0.255	Cluster3
1028	1433675_at	BQ177137	small_nucleolar_RNA_host_gene_(non-protein_coding)_1	Snhg1	1.9	0	0	1.1	0.07	0.299	Cluster3
1029	1433653_at	BG173681	family_with_sequence_similarity_20,_member_A	Fam20a	1.7	0	0	1.1	0.132	0.376	Cluster3
1030	1458899_at	AV320152	ubiquitin_specific_peptidase_53	Usp53	2.1	0	0	1.1	0.143	0.386	Cluster3
1031	1453977_at	AK014499	exocyst_complex_component_4	Exoc4	2	0	0	1.1	0.4	0.546	Cluster3
1032	1449300_at	NM_030249	CTTNBP2_N-terminal_like	Cttnbp2nl	1.8	0	0	1.1	0.125	0.37	Cluster3
1033	1420918_at	BB768208	serum/glucocorticoid_regulated_kinase_3	Sgk3	1.6	0	0	1.1	0.13	0.374	Cluster3
1034	1441989_at	AI481767	BCL2/adenovirus_E1B_interacting_protein_2	Bnip2	2	0	0	1.1	0.194	0.43	Cluster3
1035	1437746_at	AV333542	leucine_rich_repeat_transmembrane_neuronal_1	Lrrtm1	1.8	0	0	1.1	0.259	0.472	Cluster3
1036	1425098_at	BC025424	zinc_finger_protein_106	Zfp106	1.9	0	0	1.1	0.386	0.539	Cluster3
1037	1440394_at	BG073195	---	---	2.4	0	0	1.1	0.259	0.473	Cluster3
1038	1444528_at	AV367169	zinc_finger_protein_316	Zfp316	1.6	0	0	1.1	0.402	0.548	Cluster3
1039	1437932_a_at	AV227581	claudin_1	Cldn1	1.6	0	0	1.1	0.472	0.575	Cluster3
1040	1454703_x_at	BF163381	small_nucleolar_RNA_host_gene_(non-protein_coding)_1	Snhg1	1.8	0	0	1.1	0.275	0.482	Cluster3
1041	1417171_at	NM_010583	IL2_inducible_T_cell_kinase	Itk	1.7	0	0	1	0.509	0.589	Cluster3
1042	1419706_a_at	NM_031185	A_kinase_(PRKA)_anchor_protein_(gravin)_12	Akap12	1.8	0	0	1	0.372	0.532	Cluster3
1043	1416926_at	AW495711	transformation_related_protein_53_inducible_nuclear_protein_1	Trp53inp1	1.6	0	0	1	0.436	0.561	Cluster3
1044	1440417_at	BG918834	DNA_segment,_Chr_19,_ERATO_Doi_409,_expressed	D19Ertd409e	1.7	0	0	1	0.556	0.605	Cluster3
1045	1455610_at	BB457010	synemin,_intermediate_filament_protein	Synm	1.6	0	0	1	0.487	0.58	Cluster3
1046	1419301_at	BF783030	frizzled_homolog_4_(Drosophila)	Fzd4	1.7	0	0	1	0.555	0.605	Cluster3
1047	1416507_at	NM_019953	canopy_2_homolog_(zebrafish)	Cnpy2	1.8	0	0	1	0.59	0.617	Cluster3
1048	1418936_at	BC022952	v-maf_musculoaponeurotic_fibrosarcoma_oncogene_family,_protein_F_(avian)	Maff	4.3	0	0	1.4	0	0.012	Cluster3
1049	1416101_a_at	NM_015786	histone_cluster_1,_H1c	Hist1h1c	1.8	0	0	1.1	0.174	0.415	Cluster3
1050	1432026_a_at	AK015214	hect_domain_and_RLD_6	Herc6	4.6	0	0	1.4	0.003	0.073	Cluster3
1051	1457823_at	BB533736	cysteine_rich_protein_61	Cyr61	2.2	0	0	1.2	0.165	0.407	Cluster3
1052	1420380_at	AF065933	chemokine_(C-C_motif)_ligand_2	Ccl2	4.3	0	0	1.3	0.005	0.095	Cluster3
1053	1443954_at	BB530954	RAD18_homolog_(S._cerevisiae)	Rad18	1.8	0	0	1.1	0.223	0.45	Cluster3
1054	1426587_a_at	AI325183	signal_transducer_and_activator_of_transcription_3	Stat3	1.9	0	0	1.1	0.006	0.095	Cluster3
1055	1454656_at	AV271736	spermatogenesis_associated_13	Spata13	1.6	0	0	1.1	0.064	0.29	Cluster3
1056	1419721_at	NM_030701	niacin_receptor_1	Niacr1	2.3	0	0	1.2	0.022	0.186	Cluster3
1057	1440719_at	AV251087	GLE1_RNA_export_mediator_(yeast)	Gle1	1.6	0	0	1.1	0.205	0.439	Cluster3
1058	1434421_at	BB344549	immunoglobulin_superfamily_containing_leucine-rich_repeat_2	Islr2	1.6	0	0	1.1	0.198	0.433	Cluster3
1059	1451204_at	BC016096	scavenger_receptor_class_A,_member_5_(putative)	Scara5	1.7	0	0	1.1	0.284	0.488	Cluster3
1060	1428143_a_at	AK003207	patatin-like_phospholipase_domain_containing_2	Pnpla2	2.7	0	0	1.1	0.014	0.149	Cluster3
1061	1441400_at	AV328009	RIKEN_cDNA_1810029B16_gene	1810029B16Rik	1.7	0	0	1.1	0.202	0.436	Cluster3
1062	1434662_at	BM237732	autophagy_related_4A,_cysteine_peptidase	Atg4a	1.6	0	0	1	0.434	0.561	Cluster3
1063	1442914_at	AV293250	TATA_element_modulatory_factor_1	Tmf1	1.6	0	0	1	0.452	0.568	Cluster3
1064	1441284_at	BB283819	---	---	1.6	0	0	1	0.527	0.595	Cluster3
1065	1428589_at	BF134369	mitochondrial_ribosomal_protein_L41	Mrpl41	1.7	0	0	1	0.325	0.509	Cluster3
1066	1444742_at	BB200542	---	---	2.4	0	0	1.1	0.37	0.532	Cluster3
1067	1428132_at	AK008084	CDC42_small_effector_1	Cdc42se1	1.6	0	0	1	0.442	0.564	Cluster3
1068	1444082_at	BB372609	RIKEN_cDNA_A730017C20_gene	A730017C20Rik	1.6	0	0	1	0.515	0.59	Cluster3
1069	1456159_at	BE951483	---	---	1.7	0	0	1	0.499	0.585	Cluster3
1070	1443500_at	BB098429	---	---	1.7	0	0	1	0.458	0.57	Cluster3
1071	1459961_a_at	BG069527	Signal_transducer_and_activator_of_transcription_3	Stat3	1.6	0	0	1	0.35	0.523	Cluster3
1072	1459415_at	BB204258	sperm_antigen_with_calponin_homology_and_coiled-coil_domains_1	Specc1	1.6	0	0	1	0.456	0.57	Cluster3
1073	1457167_at	BB140799	mediator_complex_subunit_14	Med14	1.6	0	0	1	0.506	0.587	Cluster3
1074	1418572_x_at	NM_013749	tumor_necrosis_factor_receptor_superfamily,_member_12a	Tnfrsf12a	1.6	0	0	1	0.454	0.569	Cluster3
1075	1437711_x_at	BB519474	ornithine_decarboxylase,_structural_1	Odc1	1.6	0	0	1	0.467	0.573	Cluster3
1076	1458891_at	BB320973	---	---	1.6	0	0	1	0.556	0.605	Cluster3
1077	1419426_s_at	NM_011335	chemokine_(C-C_motif)_ligand_21A_(serine)_///_chemokine_(C-C_motif)_ligand_21B_(leucine)_///_chemokine_(C-C_motif)_ligand_21C_(leucine)_///_predicted_gene_10591_///_predicted_gene_13304_///_predicted_gene_1987_///_c-C_motif_chemokine_21c-like_///_c-C_motif_chemokine_21c-like_///_c-C_motif_chemokine_21c-like	Ccl21a_///_Ccl21b_///_Ccl21c_///_Gm10591_///_Gm13304_///_Gm1987_///_LOC100041504_///_LOC100041593_///_LOC100862177	1.7	0	0.001	1	0.809	0.679	Cluster3
1078	1423619_at	BB217136	RAS,_dexamethasone-induced_1	Rasd1	2	0	0	1	0.569	0.61	Cluster3
1079	1435234_at	BM234716	nuclear_receptor_coactivator_2	Ncoa2	1.6	0	0	1	0.695	0.65	Cluster3
1080	1458841_at	BB499674	---	---	1.7	0	0	1	0.692	0.649	Cluster3
1081	1458345_s_at	BB239199	collectin_sub-family_member_11	Colec11	2.5	0	0	1	0.717	0.655	Cluster3
1082	1431836_x_at	AK017382	MEF2_activating_motif_and_SAP_domain_containing_transcriptional_regulator	Mamstr	1.7	0	0	1	0.736	0.66	Cluster3
1083	1432304_a_at	AK011615	RIKEN_cDNA_9030624J02_gene	9030624J02Rik	1.6	0	0	1	0.821	0.681	Cluster3
1084	1450036_at	BB768208	serum/glucocorticoid_regulated_kinase_3	Sgk3	1.7	0	0	1.1	0.039	0.24	Cluster3
1085	1438307_at	AV317732	high_mobility_group_box_2	Hmgb2	3	0	0	1.2	0.227	0.452	Cluster3
1086	1456231_at	BB315153	phospholipase_A2,_group_III	Pla2g3	2.7	0	0	1.1	0.127	0.372	Cluster3
1087	1458710_at	BB550311	---	---	1.7	0	0	1.1	0.084	0.319	Cluster3
1088	1444695_at	BB210964	---	---	2.1	0	0	1.1	0.287	0.489	Cluster3
1089	1430579_at	AW045551	TRAF2_and_NCK_interacting_kinase	Tnik	1.6	0	0	1.1	0.233	0.457	Cluster3
1090	1437799_at	BM238468	RIKEN_cDNA_4933407H18_gene	4933407H18Rik	1.9	0	0	1.1	0.343	0.518	Cluster3
1091	1440720_s_at	AV251087	GLE1_RNA_export_mediator_(yeast)	Gle1	1.7	0	0	1.1	0.394	0.543	Cluster3
1092	1424638_at	AK007630	cyclin-dependent_kinase_inhibitor_1A_(P21)	Cdkn1a	4.7	0	0	1.3	0.009	0.125	Cluster3
1093	1436296_x_at	BE946605	dynein,_axonemal,_intermediate_chain_2	Dnaic2	1.6	0	0	1.1	0.445	0.565	Cluster3
1094	1428378_at	AK004770	zinc_finger_CCCH_type,_antiviral_1	Zc3hav1	2	0	0	1.1	0.067	0.294	Cluster3
1095	1453591_at	AK017626	transmembrane_protein_242	Tmem242	1.8	0	0	1.1	0.383	0.538	Cluster3
1096	1421375_a_at	NM_011313	S100_calcium_binding_protein_A6_(calcyclin)	S100a6	2	0	0	1.1	0.085	0.321	Cluster3
1097	1421228_at	AF128193	chemokine_(C-C_motif)_ligand_7	Ccl7	1.8	0	0	1.1	0.169	0.411	Cluster3
1098	1455899_x_at	BB241535	suppressor_of_cytokine_signaling_3	Socs3	8.1	0	0	1.8	0	0.007	Cluster3
1099	1435737_a_at	BQ032232	nuclear_distribution_gene_E_homolog_1_(A_nidulans)	Nde1	1.7	0	0	1.2	0.006	0.096	Cluster3
1100	1449991_at	NM_018729	CD244_natural_killer_cell_receptor_2B4	Cd244	1.7	0	0	1.2	0.044	0.251	Cluster3
1101	1451584_at	AF450241	hepatitis_A_virus_cellular_receptor_2	Havcr2	2.1	0	0	1.2	0.005	0.085	Cluster3
1102	1423747_a_at	BC027196	pyruvate_dehydrogenase_kinase,_isoenzyme_1	Pdk1	1.6	0	0	1.1	0.013	0.146	Cluster3
1103	1416881_at	BC003839	myeloid_cell_leukemia_sequence_1	Mcl1	2.2	0	0	1.2	0	0.014	Cluster3
1104	1448061_at	AA183642	macrophage_scavenger_receptor_1	Msr1	1.8	0	0	1.2	0.008	0.116	Cluster3
1105	1439114_at	BB234229	DEAD_(Asp-Glu-Ala-Asp)_box_polypeptide_60	Ddx60	2.3	0	0	1.3	0.015	0.158	Cluster3
1106	1434329_s_at	BG074607	adiponectin_receptor_2	Adipor2	1.6	0	0	1.1	0.01	0.13	Cluster3
1107	1454617_at	BG072824	arrestin_domain_containing_3	Arrdc3	1.7	0	0	1.2	0.01	0.128	Cluster3
1108	1445104_at	BB366803	RIKEN_cDNA_E230029C05_gene	E230029C05Rik	1.7	0	0	1.2	0.011	0.135	Cluster3
1109	1446657_at	BQ175003	UDP-N-acetyl-alpha-D-galactosamine:polypeptide_N-acetylgalactosaminyltransferase_6	Galnt6	1.6	0	0	1.1	0.098	0.34	Cluster3
1110	1448618_at	NM_080638	major_vault_protein	Mvp	1.8	0	0	1.2	0.004	0.082	Cluster3
1111	1417841_at	AF309644	peroxisomal_membrane_protein_2	Pxmp2	1.7	0	0	1.1	0.008	0.115	Cluster3
1112	1417910_at	X75483	cyclin_A2	Ccna2	1.6	0	0	1.1	0.04	0.242	Cluster3
1113	1428976_at	AK017463	thymopoietin	Tmpo	1.6	0	0	1.1	0.055	0.274	Cluster3
1114	1417273_at	NM_013743	pyruvate_dehydrogenase_kinase,_isoenzyme_4	Pdk4	2.9	0	0	1.3	0.009	0.121	Cluster3
1115	1421911_at	AF088862	signal_transducer_and_activator_of_transcription_2	Stat2	2	0	0	1.2	0.037	0.233	Cluster3
1116	1419561_at	NM_011337	chemokine_(C-C_motif)_ligand_3	Ccl3	3.1	0	0	1.2	0.06	0.283	Cluster3
1117	1433674_a_at	BQ177137	small_nucleolar_RNA_host_gene_(non-protein_coding)_1	Snhg1	1.9	0	0	1.1	0.032	0.222	Cluster3
1118	1436633_at	BB323723	predicted_gene_11772	Gm11772	2.6	0	0	1.2	0.069	0.298	Cluster3
1119	1450981_at	BI663014	calponin_2	Cnn2	1.7	0	0	1.1	0.14	0.383	Cluster3
1120	1419219_at	NM_024444	cytochrome_P450,_family_4,_subfamily_f,_polypeptide_18	Cyp4f18	1.6	0	0	1.1	0.17	0.411	Cluster3
1121	1436598_at	AV313923	inducible_T_cell_co-stimulator	Icos	1.7	0	0	1.1	0.116	0.36	Cluster3
1122	1418892_at	AF309564	ras_homolog_gene_family,_member_J	Rhoj	3.3	0	0	1.4	0	0.007	Cluster3
1123	1459557_at	BM115255	---	---	1.6	0	0	1.1	0.052	0.269	Cluster3
1124	1420962_at	BE979942	hyaluronan_and_proteoglycan_link_protein_2	Hapln2	2.3	0	0	1.2	0.003	0.07	Cluster3
1125	1423632_at	BI103049	G_protein-coupled_receptor_146	Gpr146	1.6	0	0	1.1	0.017	0.163	Cluster3
1126	1454037_a_at	AK005502	FMS-like_tyrosine_kinase_1	Flt1	1.9	0	0	1.2	0.016	0.16	Cluster3
1127	1449317_at	NM_009805	CASP8_and_FADD-like_apoptosis_regulator	Cflar	2.6	0	0	1.2	0.03	0.214	Cluster3
1128	1436277_at	BI734893	ring_finger_protein_207	Rnf207	1.6	0	0	1.1	0.062	0.286	Cluster3
1129	1447844_at	AV077281	---	---	1.6	0	0	1.1	0.163	0.406	Cluster3
1130	1451777_at	BC013672	DEAD_(Asp-Glu-Ala-Asp)_box_polypeptide_60	Ddx60	7.6	0	0	1.7	0	0.02	Cluster3
1131	1415996_at	AF173681	thioredoxin_interacting_protein	Txnip	3.8	0	0	1.4	0.002	0.052	Cluster3
1132	1448961_at	NM_008880	phospholipid_scramblase_2	Plscr2	2.2	0	0	1.2	0.049	0.262	Cluster3
1133	1455991_at	BG094881	cysteine_conjugate-beta_lyase_2	Ccbl2	1.6	0	0	1.1	0.022	0.187	Cluster3
1134	1446241_at	BB032447	---	---	2	0	0	1.2	0.073	0.303	Cluster3
1135	1428306_at	AK017926	DNA-damage-inducible_transcript_4	Ddit4	2.4	0	0	1.2	0.001	0.033	Cluster3
1136	1416125_at	U16959	FK506_binding_protein_5	Fkbp5	3.6	0	0	1.3	0	0.021	Cluster3
1137	1449534_at	NM_011517	synaptonemal_complex_protein_3	Sycp3	1.7	0	0	1.1	0.15	0.393	Cluster3
1138	1417268_at	NM_009841	CD14_antigen	Cd14	4.6	0	0	1.4	0.003	0.067	Cluster3
1139	1436082_at	BE992058	---	---	1.6	0	0	1.1	0.16	0.403	Cluster3
1140	1427844_a_at	AB012278	CCAAT/enhancer_binding_protein_(C/EBP),_beta	Cebpb	1.9	0	0	1.2	0.003	0.066	Cluster3
1141	1437313_x_at	C85885	high_mobility_group_box_2	Hmgb2	3.6	0	0	1.4	0.001	0.028	Cluster3
1142	1441115_at	BB205273	DNA_segment,_Chr_18,_ERATO_Doi_232,_expressed	D18Ertd232e	1.6	0	0	1.1	0.072	0.302	Cluster3
1143	1455332_x_at	BM224327	Fc_receptor,_IgG,_low_affinity_IIb	Fcgr2b	2.2	0	0	1.2	0.011	0.131	Cluster3
1144	1416322_at	NM_054077	proline_arginine-rich_end_leucine-rich_repeat	Prelp	1.6	0	0	1.1	0.137	0.381	Cluster3
1145	1439399_a_at	BB493265	small_nucleolar_RNA_host_gene_(non-protein_coding)_1	Snhg1	1.9	0	0	1.1	0.011	0.132	Cluster3
1146	1428223_at	AK006096	major_facilitator_superfamily_domain_containing_2A	Mfsd2a	2.3	0	0	1.2	0.008	0.117	Cluster3
1147	1419676_at	BC007127	myxovirus_(influenza_virus)_resistance_2	Mx2	2	0	0	1.2	0.029	0.211	Cluster3
1148	1442302_at	AV131794	N-methylpurine-DNA_glycosylase	Mpg	1.8	0	0	1.1	0.039	0.239	Cluster3
1149	1446509_at	BB541614	spermine_oxidase	Smox	2.2	0	0	1.2	0.065	0.291	Cluster3
1150	1418135_at	NM_133919	AF4/FMR2_family,_member_1	Aff1	1.7	0	0	1.1	0.045	0.252	Cluster3
1151	1438864_at	BM213777	---	---	1.6	0	0	1.1	0.059	0.281	Cluster3
1152	1444029_at	BB028141	poly_(ADP-ribose)_polymerase_family,_member_11	Parp11	2.3	0	0	1.2	0.114	0.358	Cluster3
1153	1460700_at	AK004083	signal_transducer_and_activator_of_transcription_3	Stat3	2	0	0	1.1	0.009	0.124	Cluster3
1154	1415997_at	AF173681	thioredoxin_interacting_protein	Txnip	2.2	0	0	1.2	0.013	0.147	Cluster3
1155	1452418_at	BF719154	---	---	3.7	0	0	1.2	0.017	0.166	Cluster3
1156	1459615_at	BB297163	RIKEN_cDNA_B130052P14_gene	B130052P14Rik	3.1	0	0	1.2	0.076	0.307	Cluster3
1157	1444869_at	BG075322	---	---	1.9	0	0	1.1	0.116	0.36	Cluster3
1158	1429108_at	BB745314	male-specific_lethal_2_homolog_(Drosophila)	Msl2	1.6	0	0	1.1	0.252	0.469	Cluster3
1159	1422660_at	AY052560	predicted_gene_15453_///_RNA_binding_motif_protein_3	Gm15453_///_Rbm3	2.3	0	0	-1.3	0.022	0.186	Cluster3
1160	1457183_at	BB546734	solute_carrier_family_6_(neurotransmitter_transporter,_GABA),_member_1	Slc6a1	1.6	0.004	0.005	-1.2	0.27	0.479	Cluster3
1161	1453466_at	AK013825	ribosomal_protein_S6	Rps6	1.6	0	0	-1.1	0.12	0.365	Cluster3
1162	1416332_at	NM_007705	cold_inducible_RNA_binding_protein	Cirbp	2.9	0	0	-1.2	0.015	0.154	Cluster3
1163	1428562_at	AK008813	RIKEN_cDNA_2210403K04_gene	2210403K04Rik	1.6	0	0	-1.1	0.132	0.376	Cluster3
1164	1444226_at	W07885	forkhead_box_O3	Foxo3	1.8	0	0	-1.1	0.068	0.297	Cluster3
1165	1443922_at	BB194779	REST_corepressor_3	Rcor3	2.5	0	0	-1.2	0.04	0.241	Cluster3
1166	1429796_at	AK008844	kalirin,_RhoGEF_kinase	Kalrn	1.6	0	0	-1.1	0.179	0.419	Cluster3
1167	1456964_at	BB104271	RNA_binding_motif_protein_12	Rbm12	1.6	0	0	-1.1	0.227	0.453	Cluster3
1168	1429862_at	AV235932	phospholipase_A2,_group_IVE	Pla2g4e	1.7	0	0	-1.1	0.178	0.418	Cluster3
1169	1415965_at	NM_009127	stearoyl-Coenzyme_A_desaturase_1	Scd1	1.6	0	0	-1.1	0.363	0.529	Cluster3
1170	1431911_at	AK016475	RIKEN_cDNA_4931423N10_gene	4931423N10Rik	1.6	0	0	-1.1	0.343	0.518	Cluster3
1171	1424355_a_at	AF038848	transcriptional_regulator,_SIN3B_(yeast)	Sin3b	1.8	0	0	-1.1	0.131	0.375	Cluster3
1172	1443116_at	BB200981	proteasome_(prosome,_macropain)_activator_subunit_4	Psme4	2.2	0	0	-1.1	0.428	0.558	Cluster3
1173	1417325_at	NM_009771	beta-transducin_repeat_containing_protein	Btrc	1.6	0	0	-1.1	0.282	0.487	Cluster3
1174	1443977_at	BB538930	RIKEN_cDNA_E130014H10_gene	E130014H10Rik	1.7	0	0	-1.1	0.434	0.561	Cluster3
1175	1431043_at	W78395	kelch_repeat_and_BTB_(POZ)_domain_containing_5	Kbtbd5	2	0	0	-1.1	0.158	0.401	Cluster3
1176	1453387_at	BB095161	RIKEN_cDNA_4833432E10_gene	4833432E10Rik	2.3	0	0	-1.1	0.291	0.491	Cluster3
1177	1458281_at	BF018283	---	---	1.7	0	0	-1.1	0.286	0.489	Cluster3
1178	1444452_at	BB560393	RIKEN_cDNA_D930002L09_gene	D930002L09Rik	1.6	0	0	-1.1	0.371	0.532	Cluster3
1179	1434730_at	BB346879	expressed_sequence_AI854517	AI854517	1.9	0	0	-1.2	0.031	0.218	Cluster3
1180	1453713_s_at	AK016052	non-protein_coding_RNA_85	Ncrna00085	2.8	0	0	-1.3	0.065	0.291	Cluster3
1181	1430219_at	AK017861	thymoma_viral_proto-oncogene_1_interacting_protein	Aktip	1.6	0	0	-1.1	0.276	0.483	Cluster3
1182	1445878_at	BE630205	RIKEN_cDNA_C920006O11_gene	C920006O11Rik	1.6	0	0	-1.1	0.047	0.258	Cluster3
1183	1440972_at	AI413236	nuclear_receptor-binding_SET-domain_protein_1	Nsd1	1.7	0	0	-1.2	0.214	0.445	Cluster3
1184	1439576_at	BB325333	---	---	1.9	0	0	-1.1	0.093	0.332	Cluster3
1185	1419413_at	NM_011332	chemokine_(C-C_motif)_ligand_17	Ccl17	1.7	0	0	-1.1	0.176	0.416	Cluster3
1186	1437710_x_at	AI415163	family_with_sequence_similarity_71,_member_E1	Fam71e1	1.8	0	0	-1.1	0.211	0.443	Cluster3
1187	1450135_at	AU043193	frizzled_homolog_3_(Drosophila)	Fzd3	1.8	0	0	-1.1	0.343	0.518	Cluster3
1188	1434347_s_at	BB827830	RUN_and_FYVE_domain-containing_2	Rufy2	1.6	0	0	-1.1	0.322	0.508	Cluster3
1189	1417765_a_at	NM_007446	amylase_1,_salivary	Amy1	1.7	0	0	-1.1	0.291	0.491	Cluster3
1190	1435826_at	BM250232	RAD18_homolog_(S._cerevisiae)	Rad18	1.6	0	0	-1.1	0.381	0.536	Cluster3
1191	1447494_at	R74675	DNA_segment,_Chr_7,_Brigham_&_Women's_Genetics_0826_expressed	D7Bwg0826e	1.7	0.003	0.004	-1.1	0.608	0.623	Cluster3
1192	1459694_at	AI428898	expressed_sequence_AI428898	AI428898	1.9	0	0	-1.1	0.032	0.22	Cluster3
1193	1457279_at	BB314393	predicted_gene,_17586	Gm17586	1.6	0	0	-1.1	0.256	0.47	Cluster3
1194	1456000_at	BM233297	DEAD_(Asp-Glu-Ala-Asp)_box_polypeptide_18	Ddx18	1.6	0	0	-1.1	0.34	0.517	Cluster3
1195	1427930_at	BG063905	pyridoxal_(pyridoxine,_vitamin_B6)_kinase	Pdxk	1.6	0	0	-1.1	0.351	0.524	Cluster3
1196	1441771_at	BB730600	---	---	1.6	0	0	-1.1	0.384	0.538	Cluster3
1197	1435819_at	BB833422	---	---	1.6	0	0	-1	0.512	0.59	Cluster3
1198	1460375_at	BC019418	tRNA_methyltransferase_11-2_homolog_(S._cerevisiae)	Trmt112	1.6	0	0	-1	0.515	0.59	Cluster3
1199	1456755_at	AI467545	trafficking_protein,_kinesin_binding_1	Trak1	1.6	0	0	-1	0.26	0.473	Cluster3
1200	1434817_s_at	BM206427	regulation_of_nuclear_pre-mRNA_domain_containing_2	Rprd2	5.9	0	0	-1.2	0.31	0.502	Cluster3
1201	1442860_at	BB429621	diacylglycerol_kinase,_beta	Dgkb	1.9	0	0	-1.1	0.64	0.634	Cluster3
1202	1433814_at	BB324670	---	---	1.8	0	0	-1.1	0.306	0.5	Cluster3
1203	1424759_at	BC017528	arrestin_domain_containing_4	Arrdc4	2.2	0	0	-1.1	0.459	0.57	Cluster3
1204	1458176_at	BB021263	Period_homolog_3_(Drosophila)	Per3	1.6	0	0	-1	0.394	0.543	Cluster3
1205	1429914_at	AK017858	enhancer_of_polycomb_homolog_1_(Drosophila)	Epc1	1.8	0	0	-1	0.511	0.589	Cluster3
1206	1455504_a_at	BE133749	makorin,_ring_finger_protein,_1	Mkrn1	1.7	0	0	-1	0.475	0.576	Cluster3
1207	1447178_at	BB173057	---	---	1.8	0	0	-1	0.584	0.616	Cluster3
1208	1456161_at	BE198048	RIKEN_cDNA_0610040B10_gene	0610040B10Rik	1.6	0	0	-1	0.663	0.641	Cluster3
1209	1434518_at	BG076063	phosphorylase_kinase_alpha_2	Phka2	1.8	0	0	-1	0.68	0.646	Cluster3
1210	1421811_at	AI385532	thrombospondin_1_///_cDNA_sequence_X99384	Thbs1_///_X99384	1.7	0	0	-1	0.791	0.674	Cluster3
1211	1454880_s_at	BB212341	BCL2_modifying_factor	Bmf	1.6	0	0	-1	0.412	0.552	Cluster3
1212	1443871_at	BB200812	---	---	1.6	0	0	-1	0.617	0.626	Cluster3
1213	1430295_at	BG094302	guanine_nucleotide_binding_protein,_alpha_13	Gna13	3.3	0	0	-1.1	0.608	0.623	Cluster3
1214	1436120_at	AW552579	SET_domain,_bifurcated_2	Setdb2	2	0	0	-1	0.603	0.622	Cluster3
1215	1452170_at	BC019714	chondroitin_polymerizing_factor_2	Chpf2	1.6	0	0	-1	0.717	0.655	Cluster3
1216	1447988_at	AW208869	---	---	1.6	0	0	-1	0.795	0.675	Cluster3
1217	1423289_a_at	BG069652	RIKEN_cDNA_1810029B16_gene	1810029B16Rik	2.2	0	0	-1	0.625	0.629	Cluster3
1218	1447017_at	BE956696	---	---	2	0	0	-1	0.762	0.666	Cluster3
1219	1422570_at	BI665246	YY1_transcription_factor	Yy1	1.9	0	0	-1	0.741	0.661	Cluster3
1220	1460515_at	AK018427	RIKEN_cDNA_8430419K02_gene	8430419K02Rik	2.8	0	0	-1	0.753	0.664	Cluster3
1221	1451794_at	BC026867	transmembrane_and_coiled_coil_domains_3	Tmcc3	2.6	0	0	-1	0.757	0.665	Cluster3
1222	1438065_at	AI414526	regulation_of_nuclear_pre-mRNA_domain_containing_1A	Rprd1a	1.7	0	0	-1	0.797	0.676	Cluster3
1223	1424074_at	AK011367	basic_transcription_factor_3-like_4	Btf3l4	1.6	0	0	-1	0.849	0.688	Cluster3
1224	1418457_at	AF252873	chemokine_(C-X-C_motif)_ligand_14	Cxcl14	1.7	0	0	-1	0.757	0.665	Cluster3
1225	1453470_a_at	BG094302	guanine_nucleotide_binding_protein,_alpha_13	Gna13	2.9	0	0	-1	0.793	0.675	Cluster3
1226	1417422_at	NM_010321	glycine_N-methyltransferase	Gnmt	1.6	0	0	-1	0.882	0.696	Cluster3
1227	1440637_at	BG074656	---	---	1.7	0	0	-1	0.817	0.681	Cluster3
1228	1435704_at	BB552195	RIKEN_cDNA_C920006O11_gene	C920006O11Rik	2.2	0	0	-1	0.791	0.674	Cluster3
1229	1441813_at	AW490963	predicted_gene_9484	Gm9484	1.9	0	0	-1	0.808	0.679	Cluster3
1230	1440357_at	BM938290	microRNA_let7b	Mirlet7b	1.7	0	0	-1	0.836	0.685	Cluster3
1231	1444111_at	AU067830	---	---	1.8	0	0	-1	0.661	0.64	Cluster3
1232	1444359_at	BB354954	---	---	1.6	0	0	-1	0.831	0.684	Cluster3
1233	1446769_at	AV028075	tetratricopeptide_repeat_domain_39C	Ttc39c	1.7	0	0	-1	0.641	0.634	Cluster3
1234	1419772_at	AA185333	---	---	2	0	0	-1	0.696	0.65	Cluster3
1235	1443215_at	BB389017	regulating_synaptic_membrane_exocytosis_2	Rims2	2	0	0	-1	0.713	0.654	Cluster3
1236	1422134_at	NM_008036	FBJ_osteosarcoma_oncogene_B	Fosb	2	0.01	0.012	-1	0.924	0.705	Cluster3
1237	1431614_at	AK012929	RIKEN_cDNA_2810049E08_gene	2810049E08Rik	2.1	0	0	-1	0.684	0.647	Cluster3
1238	1435216_a_at	BF319642	outer_dense_fiber_of_sperm_tails_2	Odf2	1.9	0	0	-1	0.793	0.675	Cluster3
1239	1441301_at	BB727497	---	---	1.6	0	0	-1	0.814	0.68	Cluster3
1240	1438781_at	AU067701	Tet_methylcytosine_dioxygenase_2	Tet2	1.6	0	0	-1	0.761	0.666	Cluster3
1241	1458709_a_at	AV274704	ataxin_7-like_1	Atxn7l1	1.7	0	0	-1	0.848	0.688	Cluster3
1242	1438579_at	BM213836	UTP14,_U3_small_nucleolar_ribonucleoprotein,_homolog_B_(yeast)	Utp14b	3.2	0	0	-1	0.7	0.651	Cluster3
1243	1434350_at	BG070296	cysteine-serine-rich_nuclear_protein_1	Csrnp1	2	0	0	-1	0.773	0.67	Cluster3
1244	1446840_at	BQ032894	---	---	2.8	0	0	-1	0.674	0.645	Cluster3
1245	1438247_at	AI596396	kelch-like_15_(Drosophila)	Klhl15	2.7	0	0	-1	0.779	0.672	Cluster3
1246	1447954_at	BB484412	leucine_rich_repeat_containing_49	Lrrc49	1.8	0	0	-1	0.812	0.68	Cluster3
1247	1426040_a_at	AF000968	outer_dense_fiber_of_sperm_tails_2	Odf2	1.8	0	0	-1	0.807	0.678	Cluster3
1248	1425001_at	BC023104	ring_finger_protein_146	Rnf146	1.6	0	0	-1	0.867	0.693	Cluster3
1249	1426081_a_at	AF177197	deiodinase,_iodothyronine,_type_II	Dio2	2.4	0	0	-1	0.807	0.678	Cluster3
1250	1438815_at	BB360457	histone_cluster_2,_H2aa1_///_histone_cluster_2,_H2aa2	Hist2h2aa1_///_Hist2h2aa2	3.5	0	0	-1	0.824	0.682	Cluster3
1251	1442258_at	AV229709	lon_peptidase_2,_peroxisomal	Lonp2	1.6	0	0	-1	0.836	0.685	Cluster3
1252	1439786_at	BQ030936	growth_factor_receptor_bound_protein_2-associated_protein_2	Gab2	1.6	0	0	-1	0.883	0.696	Cluster3
1253	1428544_at	BE689422	RIKEN_cDNA_0610007L01_gene	0610007L01Rik	1.6	0	0	-1	0.888	0.698	Cluster3
1254	1436558_at	BG065617	TATA_box_binding_protein_(Tbp)-associated_factor,_RNA_polymerase_I,_D	Taf1d	1.6	0	0	-1	0.891	0.699	Cluster3
1255	1446718_at	BB174460	nuclear_factor_of_kappa_light_polypeptide_gene_enhancer_in_B_cells_inhibitor,_beta	Nfkbib	1.8	0	0	-1	0.895	0.7	Cluster3
1256	1425126_at	BC011310	neural_cell_adhesion_molecule_1	Ncam1	2	0	0	-1	0.914	0.703	Cluster3
1257	1435723_at	BB039336	predicted_gene_9776	Gm9776	1.6	0	0	-1	0.901	0.701	Cluster3
1258	1418323_at	BM232562	feminization_1_homolog_b_(C._elegans)	Fem1b	2.9	0	0	-1	0.908	0.702	Cluster3
1259	1420119_s_at	AU020177	PHD_finger_protein_3	Phf3	1.8	0	0	-1	0.908	0.702	Cluster3
1260	1442030_at	BB379905	---	---	1.7	0	0	-1	0.93	0.706	Cluster3
1261	1452473_at	AJ132433	proline_rich_15	Prr15	1.6	0.002	0.003	-1	0.971	0.716	Cluster3
1262	1436491_at	BB387637	X-linked_lymphocyte-regulated_5_pseudogene	Gm11346	1.6	0	0	-1	0.958	0.712	Cluster3
1263	1452933_at	AK018681	ankyrin_repeat_domain_39	Ankrd39	1.7	0	0	-1	0.942	0.709	Cluster3
1264	1440975_at	BB275943	matrix-remodelling_associated_7	Mxra7	1.6	0	0	-1	0.948	0.71	Cluster3
1265	1436882_at	AV210814	ubiquitin-like_5	Ubl5	2.1	0	0	-1	0.926	0.705	Cluster3
1266	1453374_at	AW744618	zinc_finger,_AN1-type_domain_5	Zfand5	1.7	0	0	-1	0.964	0.714	Cluster3
1267	1444418_at	BM225081	Inositol_1,4,5-triphosphate_receptor_2	Itpr2	1.8	0	0	-1	0.965	0.714	Cluster3
1268	1439699_at	BB525237	---	---	2	0	0	-1	0.947	0.71	Cluster3
1269	1442188_at	BE979116	---	---	1.7	0	0	-1	0.98	0.718	Cluster3
1270	1457805_at	BM205530	---	---	1.7	0	0	-1	0.989	0.719	Cluster3
1271	1442018_at	BE632903	B_cell_translocation_gene_1,_anti-proliferative	Btg1	1.8	0	0	-1	0.983	0.718	Cluster3
1272	1430252_at	BB753814	RIKEN_cDNA_3110027N22_gene	3110027N22Rik	1.7	0	0	-1	0.982	0.718	Cluster3
1273	1432006_at	AK009735	adaptor_protein_complex_AP-2,_alpha_2_subunit	Ap2a2	1.7	0	0	-1	0.991	0.72	Cluster3
1274	1437553_at	AV296359	BRCA1/BRCA2-containing_complex,_subunit_3	Brcc3	1.8	0	0	1	0.996	0.721	Cluster3
1275	1446190_at	BB269897	doublecortin-like_kinase_1	Dclk1	1.6	0	0	-1.1	0.107	0.35	Cluster3
1276	1437264_at	AV278321	cDNA_sequence_BC051142	BC051142	1.6	0	0	-1.1	0.367	0.531	Cluster3
1277	1420961_a_at	NM_028582	influenza_virus_NS1A_binding_protein	Ivns1abp	1.8	0	0	-1.1	0.257	0.471	Cluster3
1278	1424932_at	U03425	epidermal_growth_factor_receptor	Egfr	1.6	0	0	-1.1	0.44	0.563	Cluster3
1279	1450229_at	AB019028	mediator_complex_subunit_14	Med14	1.9	0	0	-1.1	0.467	0.573	Cluster3
1280	1436202_at	AI853644	metastasis_associated_lung_adenocarcinoma_transcript_1_(non-coding_RNA)	Malat1	1.6	0	0	-1.1	0.305	0.499	Cluster3
1281	1451194_at	BC024112	aldolase_B,_fructose-bisphosphate	Aldob	1.6	0	0	-1.1	0.46	0.571	Cluster3
1282	1440072_at	BB205754	RIKEN_cDNA_E430022K19_gene	E430022K19Rik	2.1	0	0	-1.1	0.329	0.511	Cluster3
1283	1459994_x_at	AV027486	transferrin_receptor_2	Tfr2	1.6	0	0	-1.1	0.548	0.603	Cluster3
1284	1428547_at	AV273591	5'_nucleotidase,_ecto	Nt5e	1.6	0	0	-1	0.36	0.528	Cluster3
1285	1444441_at	AW490909	Rap_guanine_nucleotide_exchange_factor_(GEF)-like_1	Rapgefl1	2.3	0	0	-1.1	0.448	0.567	Cluster3
1286	1455039_a_at	BF017589	transcriptional_regulator,_SIN3B_(yeast)	Sin3b	2	0	0	-1.1	0.374	0.533	Cluster3
1287	1457596_at	AV228177	Uncharacterized_LOC100503146	LOC100503146	2	0	0	-1.1	0.459	0.57	Cluster3
1288	1435132_at	AI505698	dispatched_homolog_1_(Drosophila)	Disp1	1.6	0	0	-1	0.659	0.64	Cluster3
1289	1431448_at	BB014081	RIKEN_cDNA_4930474N09_gene	4930474N09Rik	2.3	0	0	-1.1	0.475	0.576	Cluster3
1290	1453632_at	BB548441	RIKEN_cDNA_4930538K18_gene_///_expressed_sequence_AU022252	4930538K18Rik_///_AU022252	1.6	0	0	-1	0.552	0.604	Cluster3
1291	1447223_at	AW120584	---	---	2	0	0	-1	0.5	0.586	Cluster3
1292	1428114_at	AW556396	solute_carrier_family_14_(urea_transporter),_member_1	Slc14a1	1.8	0	0	-1	0.617	0.626	Cluster3
1293	1420702_at	NM_026105	RIKEN_cDNA_1700093K21_gene	1700093K21Rik	2	0	0	-1	0.778	0.671	Cluster3
1294	1457117_at	AV248273	nuclear_factor,_erythroid_derived_2,_like_2	Nfe2l2	3.9	0	0	-1.1	0.654	0.638	Cluster3
1295	1426609_at	BM232345	DIS3_mitotic_control_homolog_(S._cerevisiae)	Dis3	1.7	0	0	-1	0.713	0.654	Cluster3
1296	1449996_a_at	NM_022314	tropomyosin_3,_gamma	Tpm3	1.7	0	0	-1	0.697	0.65	Cluster3
1297	1430055_at	AK006956	RIKEN_cDNA_1700080G18_gene	1700080G18Rik	1.7	0	0	-1.1	0.31	0.502	Cluster3
1298	1456857_at	BB782615	RIKEN_cDNA_1500011B03_gene	1500011B03Rik	2.1	0	0	-1.1	0.307	0.5	Cluster3
1299	1434637_x_at	BF017589	transcriptional_regulator,_SIN3B_(yeast)	Sin3b	1.9	0	0	-1.1	0.205	0.439	Cluster3
1300	1429840_at	AW491495	RIKEN_cDNA_4933439G12_gene	4933439G12Rik	1.7	0	0	-1.1	0.421	0.555	Cluster3
1301	1437270_a_at	BB825816	cardiotrophin-like_cytokine_factor_1	Clcf1	1.6	0	0	-1	0.634	0.632	Cluster3
1302	1437879_at	BG071776	asparagine-linked_glycosylation_10B_(alpha-1,2-glucosyltransferase)	Alg10b	1.7	0	0	-1.1	0.438	0.563	Cluster3
1303	1449356_at	NM_029569	ankyrin_repeat_and_SOCs_box-containing_5	Asb5	1.7	0	0	-1.1	0.515	0.591	Cluster3
1304	1429832_at	AK014665	predicted_gene,_17748_///_peptidyl_prolyl_isomerase_H	Gm17748_///_Ppih	1.7	0	0	-1.1	0.382	0.538	Cluster3
1305	1429895_at	AK009271	RIKEN_cDNA_2310010G23_gene	2310010G23Rik	1.7	0	0	-1.1	0.22	0.448	Cluster3
1306	1438295_at	BM247146	---	---	3.3	0	0	-1.1	0.21	0.442	Cluster3
1307	1459105_at	BB102018	---	---	2.2	0	0	-1.1	0.344	0.519	Cluster3
1308	1429170_a_at	AK012676	metal_response_element_binding_transcription_factor_1	Mtf1	1.8	0	0	-1.1	0.381	0.537	Cluster3
1309	1427963_s_at	BE979765	retinol_dehydrogenase_9	Rdh9	2.1	0	0	-1.1	0.424	0.557	Cluster3
1310	1427931_s_at	BG063905	pyridoxal_(pyridoxine,_vitamin_B6)_kinase	Pdxk	1.8	0	0	-1.1	0.457	0.57	Cluster3
1311	1448640_at	NM_028122	solute_carrier_family_14_(urea_transporter),_member_1	Slc14a1	1.7	0	0	-1	0.564	0.608	Cluster3
1312	1418889_a_at	NM_139059	casein_kinase_1,_delta	Csnk1d	1.6	0	0	-1	0.565	0.608	Cluster3
1313	1428889_at	AK007557	alkB,_alkylation_repair_homolog_3_(E._coli)	Alkbh3	1.7	0	0	-1	0.457	0.57	Cluster3
1314	1418507_s_at	NM_007706	suppressor_of_cytokine_signaling_2	Socs2	1.7	0	0	-1	0.53	0.596	Cluster3
1315	1421654_a_at	NM_019390	lamin_A	Lmna	1.7	0	0	-1	0.636	0.633	Cluster3
1316	1450718_at	NM_018825	SH2B_adaptor_protein_2	Sh2b2	1.8	0	0	-1	0.685	0.647	Cluster3
1317	1448325_at	NM_008654	protein_phosphatase_1,_regulatory_(inhibitor)_subunit_15A	Ppp1r15a	1.6	0	0	-1	0.674	0.644	Cluster3
1318	1445576_at	AI413817	radial_spoke_head_10_homolog_B_(Chlamydomonas)	Rsph10b2	1.6	0	0	-1	0.743	0.662	Cluster3
1319	1418726_a_at	NM_011619	troponin_T2,_cardiac	Tnnt2	1.7	0	0	-1	0.775	0.67	Cluster3
1320	1438799_at	AV338180	Dlx6_antisense_RNA_1	Dlx6as1	-1.8	0	0	-1.2	0.053	0.27	Cluster3
1321	1419845_at	AI325350	distal-less_homeobox_1,_antisense	Dlx1as	-1.7	0	0	-1.1	0.37	0.532	Cluster3
1322	1460587_at	BB307661	SOX2_overlapping_transcript_(non-protein_coding)	Sox2ot	-2	0	0	-1.1	0.265	0.475	Cluster3
1323	1435906_x_at	BE197524	guanylate_binding_protein_2	Gbp2	31.6	0	0	25.1	0	0	Cluster4
1324	1452231_x_at	M74124	myeloid_nuclear_differentiation_antigen_like	Mndal	1.8	0	0	1.8	0	0.002	Cluster4
1325	1417292_at	NM_008330	interferon_gamma_inducible_protein_47	Ifi47	9.3	0	0	8.3	0	0	Cluster4
1326	1424254_at	BC027285	interferon_induced_transmembrane_protein_1	Ifitm1	1.9	0	0	1.9	0	0	Cluster4
1327	1422804_at	NM_011454	serine_(or_cysteine)_peptidase_inhibitor,_clade_B,_member_6b	Serpinb6b	1.8	0	0	1.8	0	0.001	Cluster4
1328	1418240_at	NM_010260	guanylate_binding_protein_2	Gbp2	26.9	0	0	21.9	0	0	Cluster4
1329	1431008_at	BG916808	histocompatibility_2,_Q_region_locus_6_///_histocompatibility_2,_Q_region_locus_6-like	H2-Q6_///_LOC68395	7.1	0	0	6.3	0	0	Cluster4
1330	1436576_at	BB239429	family_with_sequence_similarity_26,_member_F	Fam26f	2.5	0	0	2.3	0	0	Cluster4
1331	1460188_at	NM_013545	protein_tyrosine_phosphatase,_non-receptor_type_6	Ptpn6	1.9	0	0	1.8	0	0	Cluster4
1332	1433933_s_at	BB553107	solute_carrier_organic_anion_transporter_family,_member_2b1	Slco2b1	1.8	0	0	1.7	0	0	Cluster4
1333	1418204_s_at	NM_019467	allograft_inflammatory_factor_1	Aif1	1.7	0	0	1.7	0	0	Cluster4
1334	1421571_a_at	NM_010741	lymphocyte_antigen_6_complex,_locus_C1_///_lymphocyte_antigen_6_complex,_locus_C2	Ly6c1_///_Ly6c2	3.1	0	0	3.1	0	0	Cluster4
1335	1450826_a_at	NM_011315	serum_amyloid_A_3	Saa3	1.9	0.013	0.014	1.9	0.014	0.153	Cluster4
1336	1419043_a_at	BM239828	interferon_inducible_GTPase_1	Iigp1	28	0	0	18	0	0	Cluster4
1337	1436905_x_at	BB218107	lysosomal-associated_protein_transmembrane_5	Laptm5	1.6	0	0	1.5	0	0.002	Cluster4
1338	1418652_at	NM_008599	chemokine_(C-X-C_motif)_ligand_9	Cxcl9	29.8	0	0	19.3	0	0	Cluster4
1339	1451644_a_at	BC010602	histocompatibility_2,_Q_region_locus_4_///_histocompatibility_2,_Q_region_locus_6_///_histocompatibility_2,_Q_region_locus_6-like	H2-Q4_///_H2-Q6_///_LOC68395	5.4	0	0	4.4	0	0	Cluster4
1340	1449454_at	AI647987	bone_marrow_stromal_cell_antigen_1	Bst1	1.8	0	0	1.6	0	0.018	Cluster4
1341	1439831_at	AW111920	---	---	14.5	0	0	8.4	0	0	Cluster4
1342	1438855_x_at	BB233088	tumor_necrosis_factor,_alpha-induced_protein_2	Tnfaip2	1.6	0	0	1.5	0.001	0.029	Cluster4
1343	1417290_at	NM_029796	leucine-rich_alpha-2-glycoprotein_1	Lrg1	2.7	0	0	2.1	0	0	Cluster4
1344	1436003_at	AV280637	vascular_cell_adhesion_molecule_1	Vcam1	2	0	0	1.7	0	0.001	Cluster4
1345	1423584_at	AI481026	insulin-like_growth_factor_binding_protein_7	Igfbp7	1.8	0	0	1.8	0	0	Cluster4
1346	1418638_at	NM_010387	histocompatibility_2,_class_II,_locus_Mb1_///_histocompatibility_2,_class_II,_locus_Mb2	H2-DMb1_///_H2-DMb2	1.8	0	0	1.8	0	0	Cluster4
1347	1422903_at	NM_010745	lymphocyte_antigen_86	Ly86	1.8	0	0	1.8	0	0	Cluster4
1348	1429954_at	AK014135	C-type_lectin_domain_family_4,_member_a3	Clec4a3	1.7	0	0	1.7	0	0.009	Cluster4
1349	1418536_at	M29881	histocompatibility_2,_Q_region_locus_7_///_histocompatibility_2,_Q_region_locus_8_///_histocompatibility_2,_Q_region_locus_9_///_histocompatibility_2,_Q_region_locus_6-like	H2-Q7_///_H2-Q8_///_H2-Q9_///_LOC68395	7.2	0	0	7.5	0	0	Cluster4
1350	1417141_at	NM_018738	interferon_gamma_induced_GTPase	Igtp	16.2	0	0	9.7	0	0	Cluster4
1351	1424374_at	BC005577	GTPase,_IMAP_family_member_4	Gimap4	2.5	0	0	2.1	0	0.002	Cluster4
1352	1435454_a_at	BE853170	cDNA_sequence_BC006779	BC006779	1.9	0	0	1.7	0	0	Cluster4
1353	1448025_at	AI662854	signal-regulatory_protein_beta_1-like_///_signal-regulatory_protein_beta_1A_///_signal-regulatory_protein_beta_1B	LOC100038947_///_Sirpb1a_///_Sirpb1b	2.2	0	0	1.9	0.002	0.048	Cluster4
1354	1449289_a_at	BF715219	beta-2_microglobulin	B2m	2.9	0	0	2.3	0	0	Cluster4
1355	1426971_at	AK004894	ubiquitin-like_modifier_activating_enzyme_7	Uba7	2.4	0	0	2	0	0	Cluster4
1356	1448890_at	NM_008452	Kruppel-like_factor_2_(lung)	Klf2	2.1	0	0	1.8	0	0.001	Cluster4
1357	1419589_at	BB039247	CD93_antigen	Cd93	2.6	0	0	2.1	0	0.001	Cluster4
1358	1451821_a_at	U83636	nuclear_antigen_Sp100	Sp100	1.6	0	0	1.4	0	0.007	Cluster4
1359	1424948_x_at	L23495	histocompatibility_2,_D_region_locus_1_///_histocompatibility_2,_K1,_K_region	H2-D1_///_H2-K1	4.6	0	0	3.1	0	0	Cluster4
1360	1423754_at	BC010291	interferon_induced_transmembrane_protein_3	Ifitm3	5.4	0	0	3.5	0	0	Cluster4
1361	1451314_a_at	L08431	vascular_cell_adhesion_molecule_1	Vcam1	2.5	0	0	2	0	0	Cluster4
1362	1436778_at	AV373944	cytochrome_b-245,_beta_polypeptide	Cybb	3.8	0	0	2.7	0	0	Cluster4
1363	1437176_at	AV277444	NLR_family,_CARD_domain_containing_5	Nlrc5	11.6	0	0	5.9	0	0	Cluster4
1364	1416382_at	NM_009982	cathepsin_C	Ctsc	3.5	0	0	2.5	0	0	Cluster4
1365	1433678_at	BB210623	phospholipase_D_family,_member_4	Pld4	1.6	0	0	1.4	0	0.009	Cluster4
1366	1427746_x_at	S70184	histocompatibility_2,_K1,_K_region	H2-K1	4.3	0	0	2.9	0	0	Cluster4
1367	1449455_at	NM_010407	hemopoietic_cell_kinase	Hck	2.9	0	0	2.2	0	0	Cluster4
1368	1427301_at	BE634960	CD48_antigen	Cd48	2.2	0	0	1.8	0	0	Cluster4
1369	1438676_at	BM241485	guanylate_binding_protein_6	Gbp6	25.6	0	0	11	0	0	Cluster4
1370	1418059_at	BC017134	EGF,_latrophilin_seven_transmembrane_domain_containing_1	Eltd1	3	0	0	2.3	0	0	Cluster4
1371	1418392_a_at	NM_018734	guanylate_binding_protein_3	Gbp3	12.2	0	0	8.2	0	0	Cluster4
1372	1425156_at	BC010229	guanylate_binding_protein_7	Gbp7	6.7	0	0	4.9	0	0	Cluster4
1373	1449591_at	NM_007609	caspase_4,_apoptosis-related_cysteine_peptidase	Casp4	2.8	0	0	2.4	0	0	Cluster4
1374	1424375_s_at	BC005577	GTPase,_IMAP_family_member_4	Gimap4	7.2	0	0	5.2	0	0	Cluster4
1375	1452428_a_at	AI099111	beta-2_microglobulin	B2m	2.8	0	0	2.2	0	0	Cluster4
1376	1443858_at	BI653857	tripartite_motif-containing_12C_///_tripartite_motif-containing_5	Trim12c_///_Trim5	2.4	0	0	2	0	0	Cluster4
1377	1450033_a_at	AW214029	signal_transducer_and_activator_of_transcription_1	Stat1	4.6	0	0	3.3	0	0	Cluster4
1378	1430005_a_at	AK016990	basic_leucine_zipper_transcription_factor,_ATF-like_2	Batf2	1.7	0	0	1.5	0	0.001	Cluster4
1379	1417262_at	M94967	prostaglandin-endoperoxide_synthase_2	Ptgs2	3.4	0	0	2.9	0	0	Cluster4
1380	1456046_at	AV319144	CD93_antigen	Cd93	2.6	0	0	2.3	0	0	Cluster4
1381	1434380_at	BM241271	guanylate_binding_protein_7	Gbp7	7.8	0	0	5.7	0	0	Cluster4
1382	1419042_at	BM239828	interferon_inducible_GTPase_1	Iigp1	29.1	0	0	18.7	0	0	Cluster4
1383	1439505_at	AA210377	chloride_intracellular_channel_5	Clic5	1.7	0	0	1.6	0	0.008	Cluster4
1384	1448734_at	BB332449	ceruloplasmin	Cp	2.5	0	0	2.2	0	0	Cluster4
1385	1456907_at	BI104444	chemokine_(C-X-C_motif)_ligand_9	Cxcl9	2	0	0	1.9	0	0.01	Cluster4
1386	1423555_a_at	BB329808	interferon-induced_protein_44	Ifi44	4.8	0	0	4	0	0	Cluster4
1387	1437277_x_at	BB550124	transglutaminase_2,_C_polypeptide	Tgm2	3.5	0	0	3.1	0	0	Cluster4
1388	1433428_x_at	AW321975	transglutaminase_2,_C_polypeptide	Tgm2	3.4	0	0	3	0	0	Cluster4
1389	1455900_x_at	BB041811	transglutaminase_2,_C_polypeptide	Tgm2	3.4	0	0	3	0	0	Cluster4
1390	1416295_a_at	L20048	interleukin_2_receptor,_gamma_chain	Il2rg	8.4	0	0	7.1	0	0	Cluster4
1391	1435386_at	BB667216	Von_Willebrand_factor_homolog	Vwf	2.1	0	0	2	0	0	Cluster4
1392	1451335_at	AF263458	placenta-specific_8	Plac8	12.5	0	0	7.8	0	0	Cluster4
1393	1434438_at	BF148012	SAM_domain_and_HD_domain,_1	Samhd1	1.8	0	0	1.6	0	0	Cluster4
1394	1424727_at	D83648	chemokine_(C-C_motif)_receptor_5	Ccr5	1.7	0	0	1.5	0.001	0.023	Cluster4
1395	1451355_at	AF282864	alkaline_ceramidase_2	Acer2	2.9	0	0	2.3	0	0	Cluster4
1396	1417793_at	NM_019440	immunity-related_GTPase_family_M_member_2	Irgm2	8.5	0	0	7	0	0	Cluster4
1397	1418480_at	NM_023785	pro-platelet_basic_protein	Ppbp	1.6	0	0	1.5	0	0.004	Cluster4
1398	1434372_at	BE688358	expressed_sequence_AW112010	AW112010	8.6	0	0	7.1	0	0	Cluster4
1399	1438027_at	BB668084	---	---	4.3	0	0	3.8	0	0	Cluster4
1400	1419697_at	NM_019494	chemokine_(C-X-C_motif)_ligand_11	Cxcl11	2.3	0	0	2.2	0	0.003	Cluster4
1401	1417495_x_at	BB332449	ceruloplasmin	Cp	2.4	0	0	2	0	0	Cluster4
1402	1417346_at	BG084230	PYD_and_CARD_domain_containing	Pycard	1.9	0	0	1.7	0	0	Cluster4
1403	1447927_at	BG092512	guanylate-binding_protein_10_///_guanylate_binding_protein_6	Gbp10_///_Gbp6	13.8	0	0	8.7	0	0	Cluster4
1404	1427747_a_at	X14607	lipocalin_2	Lcn2	21.1	0	0	10.6	0	0	Cluster4
1405	1422411_s_at	NM_017388	eosinophil-associated,_ribonuclease_A_family,_member_1_///_eosinophil-associated,_ribonuclease_A_family,_member_12_///_eosinophil-associated,_ribonuclease_A_family,_member_2_///_eosinophil-associated,_ribonuclease_A_family,_member_3	Ear1_///_Ear12_///_Ear2_///_Ear3	1.7	0.001	0.001	1.5	0.006	0.101	Cluster4
1406	1451721_a_at	M15848	histocompatibility_2,_class_II_antigen_A,_beta_1	H2-Ab1	2.6	0	0	3.9	0	0	Cluster4
1407	1438858_x_at	AV018723	histocompatibility_2,_class_II_antigen_A,_alpha	H2-Aa	2.8	0	0	4.2	0	0	Cluster4
1408	1450648_s_at	NM_010379	histocompatibility_2,_class_II_antigen_A,_beta_1	H2-Ab1	2.8	0	0	4.3	0	0	Cluster4
1409	1433512_at	BB138212	Friend_leukemia_integration_1	Fli1	1.5	0	0.001	1.7	0	0.001	Cluster4
1410	1417025_at	NM_010382	histocompatibility_2,_class_II_antigen_E_beta	H2-Eb1	2	0	0	3	0	0	Cluster4
1411	1456768_a_at	AV319507	multimerin_2	Mmrn2	1.5	0	0	2	0	0	Cluster4
1412	1437451_at	BB736636	endothelial_cell_surface_expressed_chemotaxis_and_apoptosis_regulator	Ecscr	1.9	0	0	2	0	0	Cluster4
1413	1436996_x_at	AV066625	lysozyme_1	Lyz1	2.2	0	0	2.4	0	0	Cluster4
1414	1439426_x_at	AV058500	lysozyme_1	Lyz1	2.1	0	0	2.3	0	0.001	Cluster4
1415	1448862_at	NM_010494	intercellular_adhesion_molecule_2	Icam2	2.1	0	0	2.3	0	0	Cluster4
1416	1449009_at	NM_011579	T_cell_specific_GTPase_1_///_T_cell_specific_GTPase_2	Tgtp1_///_Tgtp2	11.6	0	0	13.6	0	0	Cluster4
1417	1419604_at	NM_021394	Z-DNA_binding_protein_1	Zbp1	1.7	0	0	1.7	0	0	Cluster4
1418	1419394_s_at	NM_013650	S100_calcium_binding_protein_A8_(calgranulin_A)	S100a8	3.5	0	0	3.7	0	0	Cluster4
1419	1424041_s_at	BC022123	complement_component_1,_s_subcomponent	C1s	1.8	0	0	1.8	0	0.004	Cluster4
1420	1435701_at	BM118858	cysteine_and_tyrosine-rich_protein_1	Cyyr1	1.6	0	0	1.7	0	0	Cluster4
1421	1434333_a_at	AW557946	protein_kinase_D2	Prkd2	1.4	0	0	1.6	0	0	Cluster4
1422	1437123_at	BB038352	multimerin_2	Mmrn2	1.7	0	0	2	0	0	Cluster4
1423	1426906_at	M74124	myeloid_nuclear_differentiation_antigen_like	Mndal	1.6	0	0	1.8	0	0	Cluster4
1424	1418058_at	BC017134	EGF,_latrophilin_seven_transmembrane_domain_containing_1	Eltd1	1.7	0	0	1.8	0	0	Cluster4
1425	1448756_at	NM_009114	S100_calcium_binding_protein_A9_(calgranulin_B)	S100a9	2.8	0	0	3.2	0	0	Cluster4
1426	1456288_at	BB134615	schlafen_5	Slfn5	1.5	0	0	1.6	0	0.001	Cluster4
1427	1423954_at	K02782	complement_component_3_///_complement_C3-like	C3_///_LOC100048759	1.6	0	0	1.8	0	0	Cluster4
1428	1449580_s_at	NM_010388	histocompatibility_2,_class_II,_locus_Mb1_///_histocompatibility_2,_class_II,_locus_Mb2	H2-DMb1_///_H2-DMb2	1.7	0	0	1.6	0	0	Cluster4
1429	1449453_at	AI647987	bone_marrow_stromal_cell_antigen_1	Bst1	1.9	0	0	1.8	0	0.017	Cluster4
1430	1451006_at	AV286265	xanthine_dehydrogenase	Xdh	3.3	0	0	3.1	0	0	Cluster4
1431	1419684_at	NM_021443	chemokine_(C-C_motif)_ligand_8_///_c-C_motif_chemokine_8-like	Ccl8_///_LOC100503254	2.7	0	0	2.7	0	0.001	Cluster4
1432	1442338_at	BB740904	---	---	1.7	0	0	1.7	0	0	Cluster4
1433	1418296_at	NM_008761	FXYD_domain-containing_ion_transport_regulator_5	Fxyd5	1.9	0	0	1.9	0	0	Cluster4
1434	1418641_at	BC006948	lymphocyte_cytosolic_protein_2	Lcp2	2.1	0	0	1.7	0	0	Cluster4
1435	1456873_at	BB236747	chloride_intracellular_channel_5	Clic5	2.7	0	0	2.1	0	0	Cluster4
1436	1433935_at	BI151331	expressed_sequence_AU020206	AU020206	2.1	0	0	1.7	0	0	Cluster4
1437	1425336_x_at	BC011306	histocompatibility_2,_K1,_K_region	H2-K1	4.3	0	0	2.9	0	0	Cluster4
1438	1417494_a_at	BB332449	ceruloplasmin	Cp	2.3	0	0	1.9	0	0	Cluster4
1439	1423422_at	AV113827	ankyrin_repeat_and_SOCS_box-containing_4	Asb4	1.8	0	0	1.6	0	0.01	Cluster4
1440	1451564_at	BC021340	poly_(ADP-ribose)_polymerase_family,_member_14	Parp14	4.4	0	0	3.1	0	0	Cluster4
1441	1417500_a_at	BC016492	transglutaminase_2,_C_polypeptide	Tgm2	2.8	0	0	2.4	0	0	Cluster4
1442	1416296_at	L20048	interleukin_2_receptor,_gamma_chain	Il2rg	2.6	0	0	2.2	0	0	Cluster4
1443	1455393_at	BB009037	ceruloplasmin	Cp	2.6	0	0	2.1	0	0	Cluster4
1444	1420330_at	NM_019948	C-type_lectin_domain_family_4,_member_e	Clec4e	1.7	0.001	0.001	1.5	0.004	0.08	Cluster4
1445	1430802_at	AK013097	histocompatibility_2,_Q_region_locus_5	H2-Q5	1.6	0	0	1.7	0	0.001	Cluster4
1446	1438227_at	BB143687	src_homology_2_domain-containing_transforming_protein_E	She	1.5	0	0	1.6	0	0.001	Cluster4
1447	1417185_at	BC002070	lymphocyte_antigen_6_complex,_locus_A	Ly6a	3.5	0	0	3.9	0	0	Cluster4
1448	1429184_at	BM243571	predicted_gene_4070_///_GTPase,_very_large_interferon_inducible_1	Gm4070_///_Gvin1	4.8	0	0	6.4	0	0	Cluster4
1449	1424923_at	BC002065	serine_(or_cysteine)_peptidase_inhibitor,_clade_A,_member_3G	Serpina3g	4.3	0	0	5.7	0	0	Cluster4
1450	1423547_at	AW208566	lysozyme_2	Lyz2	2.1	0	0	2.4	0	0	Cluster4
1451	1448775_at	NM_008328	predicted_gene_16340_///_interferon_activated_gene_203_///_interferon-activable_protein_203-like_///_uncharacterized_LOC100862473	Gm16340_///_Ifi203_///_LOC100862472_///_LOC100862473	1.5	0	0	1.6	0	0.001	Cluster4
1452	1418776_at	NM_029509	guanylate-binding_protein_8	Gbp8	6.3	0	0	10.9	0	0	Cluster4
1453	1435290_x_at	BE688749	histocompatibility_2,_class_II_antigen_A,_alpha	H2-Aa	4	0	0	6	0	0	Cluster4
1454	1456061_at	BM243674	GTPase,_IMAP_family_member_8	Gimap8	1.5	0	0	1.7	0	0	Cluster4
1455	1418990_at	NM_025658	membrane-spanning_4-domains,_subfamily_A,_member_4D	Ms4a4d	6.5	0	0	16.6	0	0	Cluster4
1456	1420412_at	NM_009425	tumor_necrosis_factor_(ligand)_superfamily,_member_10	Tnfsf10	1.5	0	0	1.9	0	0	Cluster4
1457	1451563_at	AF396935	EGF-like_module_containing,_mucin-like,_hormone_receptor-like_sequence_4	Emr4	1.5	0.015	0.016	1.8	0.001	0.028	Cluster4
1458	1452431_s_at	AF119253	histocompatibility_2,_class_II_antigen_A,_alpha	H2-Aa	2.4	0	0	3.6	0	0	Cluster4
1459	1425519_a_at	BC003476	CD74_antigen_(invariant_polypeptide_of_major_histocompatibility_complex,_class_II_antigen-associated)	Cd74	1.9	0	0	2.5	0	0	Cluster4
1460	1419762_at	NM_023137	ubiquitin_D	Ubd	6.3	0	0	14.5	0	0	Cluster4
1461	1425477_x_at	M15848	histocompatibility_2,_class_II_antigen_A,_beta_1	H2-Ab1	1.6	0	0	2	0	0	Cluster4
1462	1429524_at	AK021181	myosin_IF	Myo1f	1.4	0.006	0.008	1.7	0	0.007	Cluster4
1463	1448162_at	BB250384	vascular_cell_adhesion_molecule_1	Vcam1	1.2	0.002	0.003	1.6	0	0	Cluster4
1464	1419477_at	NM_053109	C-type_lectin_domain_family_2,_member_d	Clec2d	1.3	0.026	0.026	1.8	0	0.005	Cluster4
1465	1439680_at	BB187486	tumor_necrosis_factor_(ligand)_superfamily,_member_10	Tnfsf10	1.7	0	0	3.4	0	0	Cluster4
1466	1443783_x_at	AV086906	histocompatibility_2,_class_II_antigen_A,_alpha	H2-Aa	2	0	0	3.2	0	0	Cluster4
1467	1459913_at	AI645293	tumor_necrosis_factor_(ligand)_superfamily,_member_10	Tnfsf10	1.4	0	0.001	2.6	0	0	Cluster4
1468	1448688_at	AF290209	podocalyxin-like	Podxl	1.3	0	0.001	1.9	0	0	Cluster4
1469	1420437_at	NM_008324	indoleamine_2,3-dioxygenase_1	Ido1	1.3	0.166	0.115	2.1	0	0.009	Cluster4
1470	1455251_at	AV071536	integrin_alpha_1	Itga1	1.1	0.098	0.076	1.7	0	0	Cluster4
1471	1444203_at	AI661342	---	---	1.1	0.158	0.11	1.7	0	0	Cluster4
1472	1448558_a_at	NM_008869	phospholipase_A2,_group_IVA_(cytosolic,_calcium-dependent)	Pla2g4a	1	0.61	0.297	1.7	0	0	Cluster4
1473	1419714_at	NM_021893	CD274_antigen	Cd274	11.8	0	0	5.7	0	0	Cluster5
1474	1460330_at	AW702161	annexin_A3	Anxa3	1.6	0	0	1.4	0	0.002	Cluster5
1475	1451784_x_at	L36068	histocompatibility_2,_D_region_locus_1	H2-D1	3.1	0	0	2.1	0	0	Cluster5
1476	1435560_at	BI554446	integrin_alpha_L	Itgal	3.5	0	0	2.3	0	0	Cluster5
1477	1421855_at	BF136544	fibrinogen-like_protein_2	Fgl2	3	0	0	2.1	0	0	Cluster5
1478	1422124_a_at	NM_011210	protein_tyrosine_phosphatase,_receptor_type,_C	Ptprc	4.2	0	0	2.8	0	0	Cluster5
1479	1425294_at	BC024587	SLAM_family_member_8	Slamf8	1.8	0	0	1.5	0	0.01	Cluster5
1480	1436530_at	AA666504	predicted_gene_11428_///_extracellular_peptidase_inhibitor-like	Gm11428_///_LOC100504934	1.6	0	0	1.4	0.003	0.063	Cluster5
1481	1449556_at	NM_010398	RIKEN_cDNA_C920025E04_gene_///_histocompatibility_2,_T_region_locus_23	C920025E04Rik_///_H2-T23	5	0	0	3.1	0	0	Cluster5
1482	1419631_at	NM_009515	Wiskott-Aldrich_syndrome_homolog_(human)	Was	1.6	0	0	1.4	0	0	Cluster5
1483	1450355_a_at	NM_007599	capping_protein_(actin_filament),_gelsolin-like	Capg	2.7	0	0	2	0	0	Cluster5
1484	1454694_a_at	BM211413	topoisomerase_(DNA)_II_alpha	Top2a	1.6	0.001	0.001	1.4	0.01	0.129	Cluster5
1485	1425545_x_at	M86502	histocompatibility_2,_D_region_locus_1	H2-D1	3	0	0	2.1	0	0	Cluster5
1486	1419091_a_at	NM_007585	annexin_A2	Anxa2	2.4	0	0	1.8	0	0.001	Cluster5
1487	1449195_s_at	BC019961	chemokine_(C-X-C_motif)_ligand_16	Cxcl16	1.7	0	0	1.4	0	0	Cluster5
1488	1417822_at	NM_033075	DNA_segment,_Chr_17,_human_D6S56E_5	D17H6S56E-5	2.1	0	0	1.5	0	0	Cluster5
1489	1440244_at	AV329219	avian_erythroblastosis_virus_E-26_(v-ets)_oncogene_related	Erg	1.7	0	0	1.4	0	0.006	Cluster5
1490	1436312_at	AV317621	IKAROS_family_zinc_finger_1	Ikzf1	1.9	0	0	1.4	0	0	Cluster5
1491	1450136_at	NM_007646	CD38_antigen	Cd38	1.7	0	0	1.3	0.001	0.036	Cluster5
1492	1416897_at	NM_030253	poly_(ADP-ribose)_polymerase_family,_member_9	Parp9	3.9	0	0	2.1	0	0	Cluster5
1493	1449184_at	NM_009402	peptidoglycan_recognition_protein_1	Pglyrp1	4.1	0	0	2.4	0	0	Cluster5
1494	1426529_a_at	C76322	transgelin_2	Tagln2	1.7	0	0	1.4	0	0.001	Cluster5
1495	1437636_at	BB135602	pyrin_domain_containing_4	Pydc4	1.7	0	0	1.4	0.002	0.055	Cluster5
1496	1419202_at	NM_009977	cystatin_F_(leukocystatin)	Cst7	1.9	0	0	1.5	0	0.019	Cluster5
1497	1456437_x_at	BB558917	complement_component_1,_r_subcomponent_A_///_complement_component_1,_r_subcomponent_B	C1ra_///_C1rb	1.7	0	0	1.4	0	0.006	Cluster5
1498	1450534_x_at	M58156	histocompatibility_2,_K1,_K_region	H2-K1	2.1	0	0	1.6	0	0	Cluster5
1499	1449227_at	NM_009890	cholesterol_25-hydroxylase	Ch25h	6.7	0	0	3.8	0	0	Cluster5
1500	1439407_x_at	AV212626	transgelin_2	Tagln2	1.8	0	0	1.5	0	0.001	Cluster5
1501	1451931_x_at	M69068	Histocompatibility_2,_K1,_K_region	H2-K1	3.2	0	0	2.2	0	0	Cluster5
1502	1450034_at	AW214029	signal_transducer_and_activator_of_transcription_1	Stat1	3.6	0	0	2.5	0	0	Cluster5
1503	1441075_at	AW541389	nitric_oxide_synthase_trafficker	Nostrin	1.6	0	0	1.4	0	0.001	Cluster5
1504	1435338_at	BM238926	cyclin-dependent_kinase_6	Cdk6	1.7	0	0	1.5	0	0	Cluster5
1505	1460273_a_at	NM_010872	NLR_family,_apoptosis_inhibitory_protein_2	Naip2	1.7	0	0	1.5	0	0.001	Cluster5
1506	1422953_at	NM_008039	formyl_peptide_receptor_2	Fpr2	3.3	0	0	2.3	0	0.011	Cluster5
1507	1454783_at	BI081033	interleukin_13_receptor,_alpha_1	Il13ra1	1.6	0	0	1.4	0	0.004	Cluster5
1508	1421854_at	BF136544	fibrinogen-like_protein_2	Fgl2	1.8	0	0	1.5	0.001	0.033	Cluster5
1509	1416226_at	BE979985	actin_related_protein_2/3_complex,_subunit_1B_///_predicted_pseudogene_5637	Arpc1b_///_Gm5637	2.2	0	0	1.6	0	0	Cluster5
1510	1421525_a_at	NM_010870	NLR_family,_apoptosis_inhibitory_protein_5	Naip5	1.6	0	0	1.3	0	0.004	Cluster5
1511	1447285_at	BG072508	---	---	2.7	0	0	1.9	0	0	Cluster5
1512	1417381_at	NM_007572	complement_component_1,_q_subcomponent,_alpha_polypeptide	C1qa	2.3	0	0	1.7	0	0	Cluster5
1513	1426817_at	X82786	antigen_identified_by_monoclonal_antibody_Ki_67	Mki67	1.8	0	0	1.5	0.003	0.072	Cluster5
1514	1453913_a_at	BE691515	transporter_2,_ATP-binding_cassette,_sub-family_B_(MDR/TAP)	Tap2	2.8	0	0	1.8	0	0	Cluster5
1515	1438118_x_at	AV147875	vimentin	Vim	1.7	0	0	1.4	0	0.021	Cluster5
1516	1460218_at	NM_013706	CD52_antigen	Cd52	5.6	0	0	2.6	0	0	Cluster5
1517	1454169_a_at	AK017174	epithelial_stromal_interaction_1_(breast)	Epsti1	2.5	0	0	1.6	0	0.006	Cluster5
1518	1422476_at	NM_023065	interferon_gamma_inducible_protein_30	Ifi30	2.8	0	0	1.8	0	0	Cluster5
1519	1452217_at	BE570050	AHNAK_nucleoprotein_(desmoyokin)	Ahnak	1.9	0	0	1.4	0	0.012	Cluster5
1520	1420591_at	NM_030720	G_protein-coupled_receptor_84	Gpr84	2.1	0	0	1.5	0	0	Cluster5
1521	1436544_at	BB016769	ATPase,_class_V,_type_10D	Atp10d	1.6	0	0	1.3	0.002	0.055	Cluster5
1522	1416695_at	BC002055	translocator_protein	Tspo	2.6	0	0	1.7	0	0	Cluster5
1523	1415810_at	BB702754	ubiquitin-like,_containing_PHD_and_RING_finger_domains,_1	Uhrf1	1.6	0	0	1.3	0.003	0.065	Cluster5
1524	1424354_at	BC020080	transmembrane_protein_140	Tmem140	5.1	0	0	2.7	0	0	Cluster5
1525	1456251_x_at	BB132602	translocator_protein	Tspo	3.3	0	0	2	0	0	Cluster5
1526	1459151_x_at	AW986054	interferon-induced_protein_35	Ifi35	2	0	0	1.5	0	0	Cluster5
1527	1429570_at	AK018636	mixed_lineage_kinase_domain-like	Mlkl	2.1	0	0	1.6	0	0.002	Cluster5
1528	1417876_at	AF143181	Fc_receptor,_IgG,_high_affinity_I	Fcgr1	2.8	0	0	1.9	0	0	Cluster5
1529	1426278_at	AY090098	interferon,_alpha-inducible_protein_27_like_2A	Ifi27l2a	6.2	0	0	3.2	0	0	Cluster5
1530	1427076_at	L20315	macrophage_expressed_gene_1	Mpeg1	2.2	0	0	1.6	0	0.001	Cluster5
1531	1418126_at	NM_013653	chemokine_(C-C_motif)_ligand_5	Ccl5	8.8	0	0	3.9	0	0	Cluster5
1532	1427164_at	BB730912	interleukin_13_receptor,_alpha_1	Il13ra1	1.8	0	0	1.4	0	0	Cluster5
1533	1422869_at	NM_008587	c-mer_proto-oncogene_tyrosine_kinase	Mertk	1.6	0	0	1.4	0	0	Cluster5
1534	1418580_at	BC024872	receptor_transporter_protein_4	Rtp4	8.6	0	0	3.1	0	0	Cluster5
1535	1452426_x_at	BC004065	---	---	3.2	0	0	1.9	0	0	Cluster5
1536	1453196_a_at	BQ033138	2'-5'_oligoadenylate_synthetase-like_2	Oasl2	11.9	0	0	3.7	0	0	Cluster5
1537	1430886_at	BB246912	RIKEN_cDNA_1700112E06_gene	1700112E06Rik	1.6	0	0	1.3	0.007	0.105	Cluster5
1538	1417426_at	NM_011157	serglycin	Srgn	3.8	0	0	2	0	0	Cluster5
1539	1456772_at	AI844633	neutrophil_cytosolic_factor_1	Ncf1	2.1	0	0	1.5	0	0	Cluster5
1540	1435342_at	BG069589	potassium_inwardly-rectifying_channel,_subfamily_K,_member_6	Kcnk6	1.8	0	0	1.4	0	0	Cluster5
1541	1424542_at	D00208	S100_calcium_binding_protein_A4	S100a4	2.5	0	0	1.6	0	0.005	Cluster5
1542	1416811_s_at	NM_007796	cytotoxic_T_lymphocyte-associated_protein_2_alpha_///_cytotoxic_T_lymphocyte-associated_protein_2_beta	Ctla2a_///_Ctla2b	14.3	0	0	3.7	0	0	Cluster5
1543	1438160_x_at	AV348121	solute_carrier_organic_anion_transporter_family,_member_4a1	Slco4a1	1.6	0	0	1.2	0.018	0.168	Cluster5
1544	1418293_at	NM_008332	interferon-induced_protein_with_tetratricopeptide_repeats_2	Ifit2	3.1	0	0	1.7	0	0.001	Cluster5
1545	1424927_at	BC025083	GLI_pathogenesis-related_1_(glioma)	Glipr1	1.6	0	0	1.3	0.004	0.075	Cluster5
1546	1435665_at	BM241342	tripartite_motif-containing_30D	Trim30d	3.9	0	0	1.9	0	0	Cluster5
1547	1435331_at	BM241008	pyrin_and_HIN_domain_family,_member_1	Pyhin1	3	0	0	1.7	0.004	0.084	Cluster5
1548	1435394_s_at	AI503490	ras_homolog_gene_family,_member_C	Rhoc	1.8	0	0	1.3	0	0	Cluster5
1549	1426599_a_at	BM209618	solute_carrier_family_2_(facilitated_glucose_transporter),_member_1	Slc2a1	2.1	0	0	1.4	0	0	Cluster5
1550	1439668_at	BE954985	predicted_gene_11681	Gm11681	1.9	0	0	1.3	0.01	0.129	Cluster5
1551	1456551_at	BB313400	---	---	1.6	0	0	1.3	0	0.003	Cluster5
1552	1420394_s_at	U05264	glycoprotein_49_A_///_leukocyte_immunoglobulin-like_receptor,_subfamily_B,_member_4	Gp49a_///_Lilrb4	5	0	0	2.1	0	0.002	Cluster5
1553	1418340_at	NM_010185	Fc_receptor,_IgE,_high_affinity_I,_gamma_polypeptide	Fcer1g	2.1	0	0	1.6	0	0	Cluster5
1554	1424921_at	BC008532	bone_marrow_stromal_cell_antigen_2	Bst2	4.3	0	0	2.5	0	0	Cluster5
1555	1420272_at	AV340322	SAM_domain_and_HD_domain,_1	Samhd1	1.6	0	0	1.3	0	0	Cluster5
1556	1417009_at	NM_023143	complement_component_1,_r_subcomponent_A	C1ra	2.3	0	0	1.7	0	0.001	Cluster5
1557	1452087_at	BF020640	epithelial_stromal_interaction_1_(breast)	Epsti1	3.2	0	0	2	0	0	Cluster5
1558	1438948_x_at	AV101079	translocator_protein	Tspo	3.9	0	0	2.3	0	0	Cluster5
1559	1428394_at	AK005293	leucine_rich_repeat_containing_8A_///_phytanoyl-CoA_dioxygenase_domain_containing_1	Lrrc8a_///_Phyhd1	2.4	0	0	1.7	0	0.002	Cluster5
1560	1451860_a_at	AF220015	tripartite_motif-containing_30A	Trim30a	6.5	0	0	3.1	0	0	Cluster5
1561	1440865_at	BB193024	interferon_induced_transmembrane_protein_6	Ifitm6	2.1	0	0	1.6	0.002	0.059	Cluster5
1562	1436779_at	AV373944	cytochrome_b-245,_beta_polypeptide	Cybb	1.7	0	0	1.4	0.002	0.057	Cluster5
1563	1434366_x_at	AW227993	complement_component_1,_q_subcomponent,_beta_polypeptide	C1qb	2.6	0	0	1.7	0	0.001	Cluster5
1564	1450639_at	NM_021520	predicted_gene_14085_///_solute_carrier_family_28_(sodium-coupled_nucleoside_transporter),_member_2	Gm14085_///_Slc28a2	1.7	0	0	1.4	0.015	0.155	Cluster5
1565	1439825_at	BB705351	deltex_3-like_(Drosophila)	Dtx3l	2.8	0	0	1.8	0	0	Cluster5
1566	1424552_at	BC006737	caspase_8	Casp8	1.6	0	0	1.3	0	0	Cluster5
1567	1448749_at	AF181829	pleckstrin	Plek	1.7	0	0	1.4	0	0	Cluster5
1568	1449401_at	NM_007574	complement_component_1,_q_subcomponent,_C_chain	C1qc	2.1	0	0	1.5	0	0	Cluster5
1569	1443698_at	BB645745	XIAP_associated_factor_1	Xaf1	5.5	0	0	2.1	0	0	Cluster5
1570	1452956_a_at	BI655075	interferon,_alpha-inducible_protein_27_like_1	Ifi27l1	2.2	0	0	1.4	0	0	Cluster5
1571	1425895_a_at	U43884	inhibitor_of_DNA_binding_1	Id1	1.6	0	0	1.2	0.034	0.226	Cluster5
1572	1417056_at	NM_011189	proteasome_(prosome,_macropain)_28_subunit,_alpha	Psme1	1.7	0	0	1.3	0	0.009	Cluster5
1573	1437785_at	AV364944	a_disintegrin-like_and_metallopeptidase_(reprolysin_type)_with_thrombospondin_type_1_motif,_9	Adamts9	2.6	0	0	1.5	0.002	0.057	Cluster5
1574	1421550_a_at	NM_030684	tripartite_motif-containing_34A_///_tripartite_motif-containing_34B	Trim34a_///_Trim34b	2.2	0	0	1.4	0	0.001	Cluster5
1575	1418203_at	NM_021451	phorbol-12-myristate-13-acetate-induced_protein_1	Pmaip1	1.9	0	0	1.3	0.001	0.025	Cluster5
1576	1449858_at	NM_019388	CD86_antigen	Cd86	3.3	0	0	1.6	0	0.002	Cluster5
1577	1430352_at	BG141912	a_disintegrin-like_and_metallopeptidase_(reprolysin_type)_with_thrombospondin_type_1_motif,_9	Adamts9	4.5	0	0	1.8	0.001	0.039	Cluster5
1578	1450678_at	NM_008404	integrin_beta_2	Itgb2	3.2	0	0	2	0	0	Cluster5
1579	1444040_at	AV370380	leukocyte-associated_Ig-like_receptor_1	Lair1	1.8	0	0	1.4	0	0.001	Cluster5
1580	1458381_at	BB028501	chloride_intracellular_channel_5	Clic5	1.7	0	0	1.4	0	0.02	Cluster5
1581	1418825_at	NM_008326	immunity-related_GTPase_family_M_member_1	Irgm1	11.6	0	0	4.3	0	0	Cluster5
1582	1424067_at	BC008626	intercellular_adhesion_molecule_1	Icam1	5.1	0	0	2.6	0	0	Cluster5
1583	1445897_s_at	AW986054	interferon-induced_protein_35	Ifi35	4.4	0	0	2.4	0	0	Cluster5
1584	1421217_a_at	NM_010708	lectin,_galactose_binding,_soluble_9	Lgals9	2.7	0	0	1.8	0	0	Cluster5
1585	1427041_at	BB262491	cDNA_sequence_BC013712	BC013712	1.7	0	0	1.4	0	0.004	Cluster5
1586	1433883_at	AV122663	tropomyosin_4	Tpm4	1.8	0	0	1.4	0	0.002	Cluster5
1587	1427892_at	BB235320	myosin_IG	Myo1g	1.9	0	0	1.5	0	0.007	Cluster5
1588	1460356_at	AF361882	endothelial_cell-specific_adhesion_molecule	Esam	1.8	0	0	1.4	0	0	Cluster5
1589	1435697_a_at	BB503614	cytohesin_1_interacting_protein	Cytip	4.2	0	0	2.4	0	0	Cluster5
1590	1435361_at	BB535044	sema_domain,_immunoglobulin_domain_(Ig),_short_basic_domain,_secreted,_(semaphorin)_3G	Sema3g	1.7	0	0	1.4	0.004	0.074	Cluster5
1591	1451683_x_at	M34962	histocompatibility_2,_D_region_locus_1	H2-D1	4.2	0	0	2.6	0	0	Cluster5
1592	1426970_a_at	AK004894	ubiquitin-like_modifier_activating_enzyme_7	Uba7	1.8	0	0	1.5	0	0	Cluster5
1593	1421814_at	NM_010833	moesin	Msn	1.8	0	0	1.5	0	0	Cluster5
1594	1450170_x_at	NM_010380	histocompatibility_2,_D_region_locus_1	H2-D1	2	0	0	1.6	0	0.001	Cluster5
1595	1449875_s_at	NM_010395	histocompatibility_2,_T_region_locus_10_///_histocompatibility_2,_T_region_locus_22_///_histocompatibility_2,_T_region_locus_9	H2-T10_///_H2-T22_///_H2-T9	2.4	0	0	1.6	0	0	Cluster5
1596	1427891_at	BB667753	GTPase,_IMAP_family_member_6	Gimap6	2.9	0	0	1.8	0	0.001	Cluster5
1597	1433919_at	AV302111	ankyrin_repeat_and_SOCS_box-containing_4	Asb4	1.7	0	0	1.3	0.007	0.104	Cluster5
1598	1416041_at	NM_011361	serum/glucocorticoid_regulated_kinase_1	Sgk1	3.4	0	0	2	0	0	Cluster5
1599	1452352_at	BG064656	cytotoxic_T_lymphocyte-associated_protein_2_beta	Ctla2b	9.8	0	0	3.3	0	0	Cluster5
1600	1419764_at	NM_009892	chitinase_3-like_3	Chi3l3	18.4	0	0	4.5	0.01	0.13	Cluster5
1601	1421358_at	NM_013819	histocompatibility_2,_M_region_locus_3	H2-M3	1.9	0	0	1.5	0	0	Cluster5
1602	1450424_a_at	AF110803	interleukin_18_binding_protein	Il18bp	1.9	0	0	1.5	0	0.004	Cluster5
1603	1435208_at	AV327407	deltex_3-like_(Drosophila)	Dtx3l	3.3	0	0	2.2	0	0	Cluster5
1604	1419569_a_at	BC022751	interferon-stimulated_protein	Isg20	2.2	0	0	1.7	0	0	Cluster5
1605	1426324_at	M33151	histocompatibility_2,_D_region_locus_1	H2-D1	2.9	0	0	1.9	0	0	Cluster5
1606	1418842_at	NM_008225	hematopoietic_cell_specific_Lyn_substrate_1	Hcls1	1.9	0	0	1.4	0	0.001	Cluster5
1607	1416656_at	NM_033444	chloride_intracellular_channel_1	Clic1	1.8	0	0	1.4	0	0.014	Cluster5
1608	1434067_at	BE688410	expressed_sequence_AI662270	AI662270	2.4	0	0	1.7	0	0.016	Cluster5
1609	1417961_a_at	BM240719	tripartite_motif-containing_30A	Trim30a	4.7	0	0	2.4	0	0	Cluster5
1610	1424775_at	BC018470	2'-5'_oligoadenylate_synthetase_1A	Oas1a	2.6	0	0	1.7	0	0	Cluster5
1611	1417063_at	NM_009777	complement_component_1,_q_subcomponent,_beta_polypeptide	C1qb	2.7	0	0	1.8	0	0	Cluster5
1612	1452416_at	X53802	interleukin_6_receptor,_alpha	Il6ra	1.8	0	0	1.4	0	0	Cluster5
1613	1416432_at	NM_133232	6-phosphofructo-2-kinase/fructose-2,6-biphosphatase_3	Pfkfb3	1.7	0	0	1.3	0	0.001	Cluster5
1614	1421287_a_at	NM_008816	platelet/endothelial_cell_adhesion_molecule_1	Pecam1	2.1	0	0	1.5	0	0.005	Cluster5
1615	1456250_x_at	BB533460	transforming_growth_factor,_beta_induced	Tgfbi	2.5	0	0	1.6	0	0.001	Cluster5
1616	1452178_at	BI525140	poly_(ADP-ribose)_polymerase_family,_member_10_///_plectin	Parp10_///_Plec	3.9	0	0	2	0	0	Cluster5
1617	1419178_at	M58149	CD3_antigen,_gamma_polypeptide	Cd3g	3	0	0	1.8	0	0.012	Cluster5
1618	1438037_at	AW208668	hect_domain_and_RLD_6	Herc6	2.1	0	0	1.5	0	0	Cluster5
1619	1419194_s_at	NM_022024	predicted_pseudogene_9835_///_glia_maturation_factor,_gamma	Gm9835_///_Gmfg	2.7	0	0	1.7	0	0.002	Cluster5
1620	1436171_at	BM244999	Rho_GTPase_activating_protein_30	Arhgap30	1.8	0	0	1.3	0	0.004	Cluster5
1621	1425394_at	BC023105	cDNA_sequence_BC023105	BC023105	2	0	0	1.3	0.018	0.17	Cluster5
1622	1436058_at	BB132493	radical_S-adenosyl_methionine_domain_containing_2	Rsad2	7.4	0	0	2.3	0	0	Cluster5
1623	1460251_at	NM_007987	Fas_(TNF_receptor_superfamily_member_6)	Fas	2.1	0	0	1.3	0.001	0.032	Cluster5
1624	1425947_at	K00083	interferon_gamma	Ifng	2.7	0	0	1.5	0.002	0.056	Cluster5
1625	1428016_a_at	BC028444	Ras_interacting_protein_1	Rasip1	1.9	0	0	1.3	0.001	0.021	Cluster5
1626	1434376_at	AW146109	CD44_antigen	Cd44	1.8	0	0	1.2	0.001	0.022	Cluster5
1627	1457322_at	BM938277	---	---	1.7	0	0	1.2	0.006	0.101	Cluster5
1628	1460134_at	BB082472	RIKEN_cDNA_9330175E14_gene	9330175E14Rik	1.6	0	0	1.2	0.013	0.149	Cluster5
1629	1419060_at	NM_013542	granzyme_B	Gzmb	22.6	0	0	4.9	0	0	Cluster5
1630	1456494_a_at	BG068242	tripartite_motif-containing_30A_///_tripartite_motif-containing_30D	Trim30a_///_Trim30d	3.3	0	0	1.9	0	0.001	Cluster5
1631	1424617_at	BC008158	interferon-induced_protein_35	Ifi35	2.7	0	0	1.7	0	0	Cluster5
1632	1429236_at	AV290688	UDP-N-acetyl-alpha-D-galactosamine:polypeptide_N-acetylgalactosaminyltransferase-like_2	Galntl2	1.6	0	0	1.3	0.002	0.055	Cluster5
1633	1417620_at	NM_009008	RAS-related_C3_botulinum_substrate_2	Rac2	1.8	0	0	1.3	0	0	Cluster5
1634	1420671_x_at	NM_029499	membrane-spanning_4-domains,_subfamily_A,_member_4C	Ms4a4c	2.3	0	0	1.5	0.002	0.06	Cluster5
1635	1452954_at	AV162459	ubiquitin-conjugating_enzyme_E2C	Ube2c	1.6	0	0.001	1.2	0.056	0.276	Cluster5
1636	1451174_at	BC027411	leucine_rich_repeat_containing_33	Lrrc33	2.2	0	0	1.5	0	0	Cluster5
1637	1428942_at	AA796766	metallothionein_2	Mt2	2.3	0	0	1.5	0	0	Cluster5
1638	1452016_at	BC026209	arachidonate_5-lipoxygenase_activating_protein	Alox5ap	2.2	0	0	1.4	0	0	Cluster5
1639	1435330_at	BM241008	pyrin_and_HIN_domain_family,_member_1	Pyhin1	4.4	0	0	1.9	0	0.009	Cluster5
1640	1435119_at	BE956710	predicted_gene,_19439	Gm19439	3.2	0	0	1.7	0	0.001	Cluster5
1641	1437463_x_at	BB532080	transforming_growth_factor,_beta_induced	Tgfbi	1.9	0	0	1.3	0.001	0.026	Cluster5
1642	1449824_at	NM_021400	proteoglycan_4_(megakaryocyte_stimulating_factor,_articular_superficial_zone_protein)	Prg4	2.4	0	0	1.5	0.012	0.14	Cluster5
1643	1423233_at	BB831146	CCAAT/enhancer_binding_protein_(C/EBP),_delta	Cebpd	6.6	0	0	2.1	0	0	Cluster5
1644	1448380_at	NM_011150	lectin,_galactoside-binding,_soluble,_3_binding_protein	Lgals3bp	4.6	0	0	1.8	0	0.001	Cluster5
1645	1451941_a_at	M14216	Fc_receptor,_IgG,_low_affinity_IIb	Fcgr2b	3.1	0	0	1.6	0	0.002	Cluster5
1646	1433956_at	AW543698	cadherin_5	Cdh5	2	0	0	1.3	0.001	0.034	Cluster5
1647	1452975_at	AK005060	alanine-glyoxylate_aminotransferase_2-like_1	Agxt2l1	2.3	0	0	1.4	0.004	0.084	Cluster5
1648	1437584_at	BE685667	---	---	1.8	0	0	1.2	0.004	0.077	Cluster5
1649	1427736_a_at	AJ318863	chemokine_(C-C_motif)_receptor-like_2	Ccrl2	1.7	0	0	1.2	0.001	0.034	Cluster5
1650	1452504_s_at	BC022594	chitobiase,_di-N-acetyl-	Ctbs	1.7	0	0	1.2	0.024	0.194	Cluster5
1651	1419209_at	NM_008176	chemokine_(C-X-C_motif)_ligand_1	Cxcl1	2.5	0	0	1.4	0	0.002	Cluster5
1652	1419603_at	NM_008329	interferon_activated_gene_204	Ifi204	4.9	0	0	1.8	0.001	0.029	Cluster5
1653	1422828_at	NM_013487	CD3_antigen,_delta_polypeptide	Cd3d	2.3	0	0	1.4	0.001	0.039	Cluster5
1654	1440142_s_at	BB750040	glial_fibrillary_acidic_protein	Gfap	2	0	0	1.3	0.004	0.077	Cluster5
1655	1417263_at	M94967	prostaglandin-endoperoxide_synthase_2	Ptgs2	2	0.001	0.002	1.3	0.155	0.398	Cluster5
1656	1419144_at	NM_053094	CD163_antigen	Cd163	2.3	0	0	1.4	0	0.011	Cluster5
1657	1451969_s_at	BC014870	poly_(ADP-ribose)_polymerase_family,_member_3	Parp3	3.8	0	0	1.5	0	0.019	Cluster5
1658	1438398_at	BB203348	---	---	1.6	0	0	1.1	0.122	0.368	Cluster5
1659	1424143_a_at	AF477481	chromatin_licensing_and_DNA_replication_factor_1	Cdt1	1.6	0	0	1.1	0.083	0.318	Cluster5
1660	1429049_at	AK004737	NUAK_family,_SNF1-like_kinase,_2	Nuak2	1.8	0	0	1.2	0.003	0.071	Cluster5
1661	1436994_a_at	BB533903	histone_cluster_1,_H1c	Hist1h1c	1.9	0	0	1.2	0.143	0.386	Cluster5
1662	1453238_s_at	AU018141	RIKEN_cDNA_A130040M12_gene	A130040M12Rik	5.4	0	0	1.6	0	0.001	Cluster5
1663	1422005_at	BE911144	eukaryotic_translation_initiation_factor_2-alpha_kinase_2	Eif2ak2	2.4	0	0	1.3	0.003	0.072	Cluster5
1664	1426505_at	AI122415	ecotropic_viral_integration_site_2b	Evi2b	1.6	0	0	1.2	0.024	0.194	Cluster5
1665	1446708_at	BB486740	hypoxia_inducible_factor_3,_alpha_subunit	Hif3a	2.7	0	0	1.4	0.001	0.024	Cluster5
1666	1416371_at	NM_007470	apolipoprotein_D	Apod	2.4	0	0	1.3	0.002	0.046	Cluster5
1667	1416431_at	NM_026473	tubulin,_beta_6_class_V	Tubb6	3	0	0	1.4	0.002	0.048	Cluster5
1668	1458386_at	BB283503	RIKEN_cDNA_C030009J22_gene	C030009J22Rik	1.8	0	0	1.2	0.002	0.056	Cluster5
1669	1442710_at	AV352204	---	---	1.6	0	0	1.2	0.024	0.193	Cluster5
1670	1448318_at	NM_007408	perilipin_2	Plin2	1.6	0	0	1.2	0.003	0.069	Cluster5
1671	1420404_at	NM_019388	CD86_antigen	Cd86	1.6	0	0	1.2	0.012	0.138	Cluster5
1672	1436212_at	AV173260	transmembrane_protein_71	Tmem71	1.6	0	0	1.2	0.028	0.207	Cluster5
1673	1422943_a_at	NM_013560	heat_shock_protein_1	Hspb1	1.9	0	0	1.2	0.001	0.023	Cluster5
1674	1418021_at	NM_009780	complement_component_4B_(Chido_blood_group)_///_complement_C4-B-like	C4b_///_LOC675521	4.7	0	0	1.9	0	0.001	Cluster5
1675	1449277_at	NM_011888	chemokine_(C-C_motif)_ligand_19_///_predicted_gene_12407_///_predicted_gene_13309_///_predicted_gene_2023_///_predicted_pseudogene_2457_///_predicted_gene_2564_///_c-C_motif_chemokine_19-like_///_c-C_motif_chemokine_19-like_///_c-C_motif_chemokine_19-like_///_c-C_motif_chemokine_19-like	Ccl19_///_Gm12407_///_Gm13309_///_Gm2023_///_Gm2457_///_Gm2564_///_LOC100043918_///_LOC100043921_///_LOC100861618_///_LOC100861647	2.4	0	0	1.5	0.001	0.041	Cluster5
1676	1448620_at	NM_010188	Fc_receptor,_IgG,_low_affinity_III	Fcgr3	3.3	0	0	1.7	0	0	Cluster5
1677	1451655_at	BC024709	schlafen_8	Slfn8	3.8	0	0	1.8	0	0.001	Cluster5
1678	1416051_at	NM_013484	complement_component_2_(within_H-2S)	C2	1.6	0	0	1.2	0.005	0.088	Cluster5
1679	1425225_at	BC027310	Fc_receptor,_IgG,_low_affinity_IV	Fcgr4	8.2	0	0	2.5	0	0	Cluster5
1680	1453757_at	AI639807	hect_domain_and_RLD_6	Herc6	1.6	0	0	1.2	0.003	0.071	Cluster5
1681	1435477_s_at	BM224327	Fc_receptor,_IgG,_low_affinity_IIb	Fcgr2b	5.1	0	0	2.1	0	0	Cluster5
1682	1450154_at	NM_016770	folate_hydrolase_1	Folh1	1.7	0	0	1.3	0.004	0.083	Cluster5
1683	1417898_a_at	NM_010370	granzyme_A	Gzma	14.4	0	0	3.5	0	0	Cluster5
1684	1437595_at	BB531414	RIKEN_cDNA_E030010A14_gene	E030010A14Rik	2.3	0	0	1.5	0	0.003	Cluster5
1685	1424518_at	BC020489	apolipoprotein_L_9a_///_apolipoprotein_L_9b	Apol9a_///_Apol9b	1.7	0	0	1.3	0	0.016	Cluster5
1686	1419598_at	NM_026835	membrane-spanning_4-domains,_subfamily_A,_member_6D	Ms4a6d	7.7	0	0	2.6	0	0	Cluster5
1687	1416326_at	NM_007763	cysteine-rich_protein_1_(intestinal)	Crip1	2	0	0	1.4	0.003	0.063	Cluster5
1688	1418191_at	NM_011909	ubiquitin_specific_peptidase_18	Usp18	9.5	0	0	2.8	0	0	Cluster5
1689	1426348_at	BF158638	collagen,_type_IV,_alpha_1	Col4a1	1.8	0	0	1.3	0	0.009	Cluster5
1690	1450641_at	M24849	vimentin	Vim	1.6	0	0	1.3	0.001	0.023	Cluster5
1691	1431406_at	BC022644	alanine-glyoxylate_aminotransferase_2-like_1	Agxt2l1	2.6	0	0	1.6	0	0.01	Cluster5
1692	1448561_at	NM_010877	neutrophil_cytosolic_factor_2	Ncf2	1.7	0	0	1.2	0	0.002	Cluster5
1693	1433842_at	BG069059	leucine_rich_repeat_(in_FLII)_interacting_protein_1	Lrrfip1	2.1	0	0	1.4	0	0.006	Cluster5
1694	1422557_s_at	NM_013602	metallothionein_1	Mt1	1.7	0	0	1.3	0	0.001	Cluster5
1695	1419879_s_at	AA960166	tripartite_motif-containing_25	Trim25	2.4	0	0	1.5	0	0.002	Cluster5
1696	1450484_a_at	AK004595	cytidine_monophosphate_(UMP-CMP)_kinase_2,_mitochondrial	Cmpk2	2.2	0	0	1.4	0	0.004	Cluster5
1697	1446374_at	BB460605	Rho_guanine_nucleotide_exchange_factor_(GEF)_10	Arhgef10	1.6	0	0	1.2	0.001	0.027	Cluster5
1698	1424065_at	BG064496	ER_degradation_enhancer,_mannosidase_alpha-like_1	Edem1	2.1	0	0	1.4	0	0.014	Cluster5
1699	1426454_at	AK002516	Rho,_GDP_dissociation_inhibitor_(GDI)_beta	Arhgdib	1.6	0	0	1.2	0	0.016	Cluster5
1700	1440866_at	AV328340	eukaryotic_translation_initiation_factor_2-alpha_kinase_2	Eif2ak2	2.6	0	0	1.5	0.001	0.031	Cluster5
1701	1422864_at	NM_009821	runt_related_transcription_factor_1	Runx1	1.8	0	0	1.3	0.006	0.102	Cluster5
1702	1448940_at	BC010580	tripartite_motif-containing_21	Trim21	3.6	0	0	1.7	0	0.001	Cluster5
1703	1425451_s_at	AY065557	chitinase_3-like_3_///_chitinase_3-like_4	Chi3l3_///_Chi3l4	7.2	0	0.001	2.2	0.101	0.343	Cluster5
1704	1426774_at	BM227980	poly_(ADP-ribose)_polymerase_family,_member_12	Parp12	2.9	0	0	1.6	0	0.003	Cluster5
1705	1450716_at	D67076	a_disintegrin-like_and_metallopeptidase_(reprolysin_type)_with_thrombospondin_type_1_motif,_1	Adamts1	3.2	0	0	1.6	0	0.014	Cluster5
1706	1424714_at	BC008184	aldolase_C,_fructose-bisphosphate	Aldoc	1.9	0	0	1.3	0.001	0.022	Cluster5
1707	1422264_s_at	NM_010638	Kruppel-like_factor_9	Klf9	1.6	0	0	1.2	0.001	0.03	Cluster5
1708	1420772_a_at	NM_010286	TSC22_domain_family,_member_3	Tsc22d3	2.1	0	0	1.3	0	0.006	Cluster5
1709	1452035_at	BF158638	collagen,_type_IV,_alpha_1	Col4a1	2.4	0	0	1.4	0	0.01	Cluster5
1710	1460682_s_at	BC024320	carcinoembryonic_antigen-related_cell_adhesion_molecule_1_///_carcinoembryonic_antigen-related_cell_adhesion_molecule_2	Ceacam1_///_Ceacam2	1.7	0	0	1.2	0.017	0.167	Cluster5
1711	1449221_a_at	NM_133626	ribosome_binding_protein_1	Rrbp1	1.6	0	0	1.2	0.002	0.059	Cluster5
1712	1452432_at	BF451808	tissue_factor_pathway_inhibitor	Tfpi	1.6	0	0	1.2	0.042	0.246	Cluster5
1713	1445888_x_at	AW990611	poly_(ADP-ribose)_polymerase_family,_member_3	Parp3	1.7	0	0	1.2	0	0.003	Cluster5
1714	1449027_at	AF378088	ras_homolog_gene_family,_member_U	Rhou	1.6	0	0	1.2	0	0.016	Cluster5
1715	1435629_at	AI839852	---	---	1.6	0	0	1.2	0.011	0.132	Cluster5
1716	1438530_at	BB756069	tissue_factor_pathway_inhibitor	Tfpi	1.8	0	0	1.2	0.003	0.071	Cluster5
1717	1419381_at	NM_020584	telomeric_repeat_binding_factor_2,_interacting_protein	Terf2ip	1.6	0	0	1.2	0.008	0.114	Cluster5
1718	1448181_at	BC013486	Kruppel-like_factor_15	Klf15	1.8	0	0	1.2	0	0.014	Cluster5
1719	1416627_at	NM_016907	serine_protease_inhibitor,_Kunitz_type_1	Spint1	1.7	0	0	1.2	0.001	0.043	Cluster5
1720	1451069_at	BC017621	proviral_integration_site_3	Pim3	1.8	0	0	1.2	0.001	0.041	Cluster5
1721	1429703_at	AV154947	RIKEN_cDNA_2900072G11_gene	2900072G11Rik	1.6	0	0	1.2	0.025	0.198	Cluster5
1722	1417300_at	NM_133888	sphingomyelin_phosphodiesterase,_acid-like_3B	Smpdl3b	1.6	0	0	1.2	0.029	0.209	Cluster5
1723	1452264_at	BI408679	tensin_like_C1_domain-containing_phosphatase	Tenc1	1.7	0	0	1.2	0.006	0.101	Cluster5
1724	1433836_a_at	AV365503	RIKEN_cDNA_8430408G22_gene	8430408G22Rik	1.7	0	0	1.2	0.009	0.121	Cluster5
1725	1428660_s_at	AK009693	torsin_family_3,_member_A	Tor3a	2.1	0	0	1.3	0.004	0.081	Cluster5
1726	1436061_at	BG092263	---	---	2.3	0	0	1.3	0.002	0.053	Cluster5
1727	1421326_at	NM_007780	colony_stimulating_factor_2_receptor,_beta,_low-affinity_(granulocyte-macrophage)	Csf2rb	2.6	0	0	1.4	0.001	0.029	Cluster5
1728	1420697_at	NM_023044	solute_carrier_family_15,_member_3	Slc15a3	3.4	0	0	1.5	0	0	Cluster5
1729	1425214_at	BC027331	pyrimidinergic_receptor_P2Y,_G-protein_coupled,_6	P2ry6	2.1	0	0	1.3	0.001	0.026	Cluster5
1730	1445687_at	BE629676	predicted_gene_885	Gm885	1.7	0	0	1.2	0.004	0.077	Cluster5
1731	1435084_at	BB200607	RIKEN_cDNA_C730049O14_gene	C730049O14Rik	3	0	0	1.4	0.001	0.036	Cluster5
1732	1449065_at	NM_012006	acyl-CoA_thioesterase_1	Acot1	1.7	0	0	1.2	0.008	0.113	Cluster5
1733	1455978_a_at	BB338441	matrilin_2	Matn2	2.1	0	0	1.3	0	0.012	Cluster5
1734	1421008_at	BB741897	radical_S-adenosyl_methionine_domain_containing_2	Rsad2	3.8	0	0	1.5	0.001	0.022	Cluster5
1735	1435833_at	BB381550	---	---	1.7	0	0	1.2	0.06	0.282	Cluster5
1736	1416612_at	BI251808	cytochrome_P450,_family_1,_subfamily_b,_polypeptide_1	Cyp1b1	2.6	0	0	1.3	0.001	0.03	Cluster5
1737	1441320_a_at	AV377664	expressed_sequence_AI413194_///_tripartite_motif-containing_56	AI413194_///_Trim56	1.6	0	0	1.1	0.101	0.344	Cluster5
1738	1448681_at	NM_133836	interleukin_15_receptor,_alpha_chain	Il15ra	1.7	0	0	1.2	0.001	0.023	Cluster5
1739	1455506_at	BE650825	solute_carrier_family_25,_member_34	Slc25a34	2.1	0	0	1.3	0.002	0.052	Cluster5
1740	1426261_s_at	D87867	UDP-glucuronosyltransferase_1-9-like_///_UDP-glucuronosyltransferase_1-9-like_///_UDP_glucuronosyltransferase_1_family,_polypeptide_A1_///_UDP_glycosyltransferase_1_family,_polypeptide_A10_///_UDP_glucuronosyltransferase_1_family,_polypeptide_A2_///_UDP_glucuronosyltransferase_1_family,_polypeptide_A5_///_UDP_glucuronosyltransferase_1_family,_polypeptide_A6A_///_UDP_glucuronosyltransferase_1_fami…	LOC100048662_///_LOC100048744_///_Ugt1a1_///_Ugt1a10_///_Ugt1a2_///_Ugt1a5_///_Ugt1a6a_///_Ugt1a6b_///_Ugt1a7c_///_Ugt1a9	4.4	0	0	1.6	0.004	0.077	Cluster5
1741	1451415_at	BC016562	RIKEN_cDNA_1810011O10_gene	1810011O10Rik	2.6	0	0	1.3	0.003	0.061	Cluster5
1742	1451755_a_at	BC003792	apolipoprotein_B_mRNA_editing_enzyme,_catalytic_polypeptide_1	Apobec1	1.6	0	0	1.2	0.014	0.152	Cluster5
1743	1443282_at	BB556993	PRP38_pre-mRNA_processing_factor_38_(yeast)_domain_containing_A	Prpf38a	1.9	0	0	1.2	0.019	0.174	Cluster5
1744	1418595_at	NM_020568	perilipin_4	Plin4	6.6	0	0	1.9	0	0.002	Cluster5
1745	1440158_x_at	BB209663	---	---	1.7	0	0	1.2	0.099	0.341	Cluster5
1746	1448632_at	NM_013640	proteasome_(prosome,_macropain)_subunit,_beta_type_10	Psmb10	1.8	0	0	1.2	0	0.006	Cluster5
1747	1429702_at	AV154947	RIKEN_cDNA_2900072G11_gene	2900072G11Rik	1.7	0	0	1.2	0.046	0.255	Cluster5
1748	1450699_at	NM_009150	selenium_binding_protein_1	Selenbp1	1.7	0	0	1.2	0.001	0.043	Cluster5
1749	1424716_at	BB775176	retinol_saturase_(all_trans_retinol_13,14_reductase)	Retsat	1.7	0	0	1.2	0.032	0.222	Cluster5
1750	1427345_a_at	AK002700	sulfotransferase_family_1A,_phenol-preferring,_member_1	Sult1a1	7.4	0	0	2	0	0.008	Cluster5
1751	1439902_at	BB552085	complement_component_5a_receptor_1	C5ar1	2	0	0	1.2	0.002	0.048	Cluster5
1752	1423306_at	BI963682	RIKEN_cDNA_2010002N04_gene	2010002N04Rik	2.1	0	0	1.3	0.001	0.021	Cluster5
1753	1417291_at	L26349	tumor_necrosis_factor_receptor_superfamily,_member_1a	Tnfrsf1a	1.7	0	0	1.2	0.001	0.034	Cluster5
1754	1419609_at	AV231648	chemokine_(C-C_motif)_receptor_1	Ccr1	2.4	0	0	1.3	0.011	0.136	Cluster5
1755	1416164_at	NM_011812	fibulin_5	Fbln5	3.6	0	0	1.5	0.022	0.187	Cluster5
1756	1449146_at	NM_010929	notch_4	Notch4	2.1	0	0	1.2	0.006	0.097	Cluster5
1757	1457753_at	BI655907	toll-like_receptor_13	Tlr13	2.5	0	0	1.4	0	0.005	Cluster5
1758	1441430_at	BQ174667	---	---	2.3	0	0	1.4	0.006	0.103	Cluster5
1759	1428492_at	BM208214	GLI_pathogenesis-related_2	Glipr2	1.8	0	0	1.2	0.002	0.058	Cluster5
1760	1458586_at	BB447484	---	---	1.6	0	0	1.2	0.065	0.291	Cluster5
1761	1441228_at	BM123813	apolipoprotein_L_domain_containing_1	Apold1	6.8	0	0	1.8	0	0.01	Cluster5
1762	1448265_x_at	BC015076	myelin_protein_zero-like_2	Mpzl2	1.6	0	0	1.2	0.097	0.339	Cluster5
1763	1427932_s_at	BI076834	RIKEN_cDNA_1200003I10_gene_///_RIKEN_cDNA_1200015M12_gene_///_RIKEN_cDNA_A130040M12_gene	1200003I10Rik_///_1200015M12Rik_///_A130040M12Rik	6.6	0	0	1.8	0	0.001	Cluster5
1764	1439163_at	BQ174973	zinc_finger_and_BTB_domain_containing_16	Zbtb16	2.1	0	0	1.3	0.001	0.041	Cluster5
1765	1452405_x_at	X01134	T_cell_receptor_alpha_variable_9D-3	Trav9d-3	1.6	0	0	1.1	0.072	0.302	Cluster5
1766	1439697_at	AV348583	interleukin_1_receptor_accessory_protein	Il1rap	1.7	0	0	1.2	0.013	0.146	Cluster5
1767	1420664_s_at	NM_011171	protein_C_receptor,_endothelial	Procr	3.8	0	0	1.5	0	0.017	Cluster5
1768	1420249_s_at	AV084904	chemokine_(C-C_motif)_ligand_6	Ccl6	2.6	0	0	1.4	0.002	0.047	Cluster5
1769	1436562_at	BG063981	DEAD_(Asp-Glu-Ala-Asp)_box_polypeptide_58	Ddx58	2.5	0	0	1.3	0.007	0.111	Cluster5
1770	1429399_at	BB667823	ring_finger_protein_125	Rnf125	2.4	0	0	1.3	0.002	0.053	Cluster5
1771	1422010_at	AY035889	toll-like_receptor_7	Tlr7	3.1	0	0	1.4	0	0.009	Cluster5
1772	1429943_at	AV222441	chitobiase,_di-N-acetyl-	Ctbs	1.6	0	0	1.2	0.007	0.105	Cluster5
1773	1435137_s_at	BB119177	RIKEN_cDNA_1200015M12_gene_///_RIKEN_cDNA_A130040M12_gene	1200015M12Rik_///_A130040M12Rik	5.6	0	0	1.8	0	0	Cluster5
1774	1434046_at	BG961961	expressed_sequence_AA467197	AA467197	7.9	0	0	2	0	0.019	Cluster5
1775	1448605_at	NM_007484	ras_homolog_gene_family,_member_C	Rhoc	1.7	0	0	1.2	0.004	0.078	Cluster5
1776	1448793_a_at	BC005679	syndecan_4	Sdc4	1.6	0.001	0.001	1.2	0.174	0.415	Cluster5
1777	1425281_a_at	AF201289	TSC22_domain_family,_member_3	Tsc22d3	2.7	0	0	1.4	0.001	0.023	Cluster5
1778	1440533_at	BF464033	---	---	1.8	0	0	1.2	0.018	0.167	Cluster5
1779	1438157_s_at	BB096843	nuclear_factor_of_kappa_light_polypeptide_gene_enhancer_in_B_cells_inhibitor,_alpha	Nfkbia	2.8	0	0	1.5	0	0	Cluster5
1780	1423523_at	BF687395	aminoadipate-semialdehyde_synthase	Aass	1.8	0	0	1.2	0.053	0.27	Cluster5
1781	1447839_x_at	AV378441	adrenomedullin	Adm	3.3	0	0	1.6	0	0.001	Cluster5
1782	1417130_s_at	NM_020581	angiopoietin-like_4	Angptl4	3.8	0	0	1.7	0.001	0.026	Cluster5
1783	1452398_at	AV306884	phospholipase_C,_epsilon_1	Plce1	1.6	0	0	1.2	0.001	0.033	Cluster5
1784	1420464_s_at	NM_011093	predicted_pseudogene_10693_///_predicted_gene_14548_///_predicted_gene_15448_///_leukocyte_immunoglobulin-like_receptor,_subfamily_A_(with_TM_domain),_member_6_///_leukocyte_immunoglobulin-like_receptor,_subfamily_B_(with_TM_and_ITIM_domains),_member_3_///_paired-Ig-like_receptor_A1_///_paired-Ig-like_receptor_A11_///_paired-Ig-like_receptor_A2_///_paired-Ig-like_receptor_A4_///_paired-Ig-like_re…	Gm10693_///_Gm14548_///_Gm15448_///_Lilra6_///_Lilrb3_///_Pira1_///_Pira11_///_Pira2_///_Pira4_///_Pira6_///_Pira7	1.6	0	0	1.2	0.069	0.299	Cluster5
1785	1417394_at	BG069413	Kruppel-like_factor_4_(gut)	Klf4	1.8	0	0	1.3	0.059	0.28	Cluster5
1786	1427820_at	BC021831	---	---	1.6	0.031	0.03	1.2	0.376	0.534	Cluster5
1787	1449363_at	BC019946	activating_transcription_factor_3	Atf3	2.1	0	0	1.3	0.019	0.173	Cluster5
1788	1453586_at	AV117919	ectonucleoside_triphosphate_diphosphohydrolase_1	Entpd1	1.8	0	0	1.2	0.027	0.204	Cluster5
1789	1417654_at	BC005679	syndecan_4	Sdc4	1.7	0	0	1.2	0	0.007	Cluster5
1790	1445562_at	BB283832	---	---	1.6	0	0	1.2	0.047	0.258	Cluster5
1791	1436021_at	AI426503	major_facilitator_superfamily_domain_containing_4	Mfsd4	1.6	0	0	1.2	0.113	0.357	Cluster5
1792	1449025_at	NM_010501	interferon-induced_protein_with_tetratricopeptide_repeats_3	Ifit3	8.3	0	0	2.6	0	0	Cluster5
1793	1460245_at	NM_010654	killer_cell_lectin-like_receptor,_subfamily_D,_member_1	Klrd1	3.2	0	0	1.7	0	0	Cluster5
1794	1450753_at	NM_024253	natural_killer_cell_group_7_sequence	Nkg7	3	0	0	1.6	0	0.009	Cluster5
1795	1419599_s_at	NM_026835	membrane-spanning_4-domains,_subfamily_A,_member_6D	Ms4a6d	6.6	0	0	2.5	0	0	Cluster5
1796	1421998_at	NM_023141	torsin_family_3,_member_A	Tor3a	1.8	0	0	1.3	0.002	0.06	Cluster5
1797	1419132_at	NM_011905	toll-like_receptor_2	Tlr2	1.7	0	0	1.3	0	0	Cluster5
1798	1439068_at	AV287655	endoplasmic_reticulum_aminopeptidase_1	Erap1	2.6	0	0	1.6	0	0.01	Cluster5
1799	1449360_at	NM_007781	colony_stimulating_factor_2_receptor,_beta_2,_low-affinity_(granulocyte-macrophage)	Csf2rb2	2.6	0	0	1.5	0	0	Cluster5
1800	1416309_at	BC009096	nucleolar_and_spindle_associated_protein_1	Nusap1	1.8	0	0	1.3	0.008	0.114	Cluster5
1801	1449164_at	BC021637	CD68_antigen	Cd68	1.7	0	0	1.2	0.002	0.054	Cluster5
1802	1419647_a_at	NM_133662	immediate_early_response_3	Ier3	2.3	0	0	1.4	0	0.002	Cluster5
1803	1434719_at	BB185854	alpha-2-macroglobulin	A2m	1.6	0	0	1.2	0.009	0.125	Cluster5
1804	1438921_at	BM197239	Ataxia_telangiectasia_and_Rad3_related	Atr	1.7	0	0	1.2	0.008	0.116	Cluster5
1805	1428994_s_at	AK003750	upper_zone_of_growth_plate_and_cartilage_matrix_associated	Ucma	1.8	0.001	0.001	1.3	0.152	0.395	Cluster5
1806	1426206_at	BC020129	roundabout_homolog_4_(Drosophila)	Robo4	1.7	0	0	1.3	0	0.002	Cluster5
1807	1431609_a_at	AK008391	acid_phosphatase_5,_tartrate_resistant	Acp5	1.6	0	0	1.3	0.001	0.038	Cluster5
1808	1418187_at	AF146523	receptor_(calcitonin)_activity_modifying_protein_2	Ramp2	1.8	0	0	1.3	0.011	0.135	Cluster5
1809	1439956_at	BE692425	membrane-spanning_4-domains,_subfamily_A,_member_6B	Ms4a6b	6.2	0	0	2.2	0	0	Cluster5
1810	1456014_s_at	BB113173	fermitin_family_homolog_3_(Drosophila)	Fermt3	3	0	0	1.6	0	0	Cluster5
1811	1420361_at	NM_013612	solute_carrier_family_11_(proton-coupled_divalent_metal_ion_transporters),_member_1	Slc11a1	1.9	0	0	1.3	0	0.015	Cluster5
1812	1449265_at	BC008152	caspase_1	Casp1	2	0	0	1.3	0.007	0.112	Cluster5
1813	1444178_at	BB609792	predicted_gene_9895	Gm9895	2.2	0	0	1.3	0	0.001	Cluster5
1814	1417244_a_at	NM_016850	interferon_regulatory_factor_7	Irf7	3.7	0	0	1.6	0	0.018	Cluster5
1815	1425964_x_at	U03561	heat_shock_protein_1	Hspb1	2	0	0	1.3	0	0.017	Cluster5
1816	1453939_x_at	AK019325	predicted_gene_9706	Gm9706	1.6	0	0	1.2	0.014	0.149	Cluster5
1817	1439648_at	BB313429	anillin,_actin_binding_protein	Anln	2.4	0	0	1.3	0	0.01	Cluster5
1818	1435595_at	AV016374	RIKEN_cDNA_1810011O10_gene	1810011O10Rik	2.4	0	0	1.3	0.002	0.053	Cluster5
1819	1442082_at	BB333624	complement_component_3a_receptor_1	C3ar1	2.2	0	0	1.3	0	0.005	Cluster5
1820	1425396_a_at	BC011474	lymphocyte_protein_tyrosine_kinase	Lck	2	0	0	1.3	0	0.005	Cluster5
1821	1435918_at	BB277054	family_with_sequence_similarity_107,_member_A	Fam107a	3.5	0	0	1.6	0.001	0.036	Cluster5
1822	1421408_at	NM_030691	immunoglobulin_superfamily,_member_6	Igsf6	2.2	0	0	1.3	0.003	0.072	Cluster5
1823	1418077_at	BC010580	tripartite_motif-containing_21	Trim21	1.9	0	0	1.3	0.009	0.121	Cluster5
1824	1433699_at	BM241351	tumor_necrosis_factor,_alpha-induced_protein_3	Tnfaip3	1.6	0	0	1.2	0.003	0.065	Cluster5
1825	1449106_at	NM_008161	glutathione_peroxidase_3	Gpx3	1.7	0	0	1.2	0.121	0.366	Cluster5
1826	1420915_at	AW214029	signal_transducer_and_activator_of_transcription_1	Stat1	4.9	0	0	2.1	0	0	Cluster5
1827	1456890_at	BB401061	DEAD_(Asp-Glu-Ala-Asp)_box_polypeptide_58	Ddx58	2.1	0	0	1.4	0.002	0.049	Cluster5
1828	1425974_a_at	D63902	tripartite_motif-containing_25	Trim25	2.4	0	0	1.5	0	0.001	Cluster5
1829	1416625_at	NM_009776	serine_(or_cysteine)_peptidase_inhibitor,_clade_G,_member_1	Serping1	3.1	0	0	1.7	0	0.009	Cluster5
1830	1433963_a_at	BG066664	fermitin_family_homolog_3_(Drosophila)	Fermt3	2	0	0	1.4	0	0	Cluster5
1831	1434068_s_at	BE688410	expressed_sequence_AI662270	AI662270	1.6	0	0	1.2	0.023	0.189	Cluster5
1832	1422808_s_at	NM_033374	dedicator_of_cyto-kinesis_2	Dock2	1.6	0	0	1.2	0	0.002	Cluster5
1833	1424677_at	AF336850	cytochrome_P450,_family_2,_subfamily_j,_polypeptide_9	Cyp2j9	1.6	0	0	1.3	0.002	0.05	Cluster5
1834	1448471_a_at	NM_007796	cytotoxic_T_lymphocyte-associated_protein_2_alpha	Ctla2a	16	0	0	4.3	0	0	Cluster5
1835	1448617_at	NM_007651	CD53_antigen	Cd53	2.2	0	0	1.5	0	0	Cluster5
1836	1448748_at	AF181829	pleckstrin	Plek	1.6	0	0	1.3	0	0	Cluster5
1837	1418483_a_at	AF297615	glycoprotein_galactosyltransferase_alpha_1,_3	Ggta1	1.9	0	0	1.4	0	0.001	Cluster5
1838	1421812_at	AF043943	TAP_binding_protein	Tapbp	2.5	0	0	1.6	0	0	Cluster5
1839	1448452_at	BG069095	interferon_regulatory_factor_8	Irf8	2.2	0	0	1.5	0	0	Cluster5
1840	1433741_at	BB256012	CD38_antigen	Cd38	1.6	0	0	1.3	0	0.004	Cluster5
1841	1420820_at	NM_026064	myosin,_light_chain_12A,_regulatory,_non-sarcomeric	Myl12a	1.6	0	0	1.3	0	0.001	Cluster5
1842	1434773_a_at	BM207588	solute_carrier_family_2_(facilitated_glucose_transporter),_member_1	Slc2a1	2	0	0	1.4	0	0	Cluster5
1843	1440481_at	BB229853	signal_transducer_and_activator_of_transcription_1	Stat1	5.2	0	0	2.4	0	0	Cluster5
1844	1434203_at	BF682848	family_with_sequence_similarity_107,_member_A	Fam107a	2	0	0	1.4	0	0.007	Cluster5
1845	1453228_at	AK017897	syntaxin_11	Stx11	2	0	0	1.4	0	0.007	Cluster5
1846	1449094_at	NM_008122	gap_junction_protein,_gamma_1	Gjc1	1.6	0	0	1.3	0	0.002	Cluster5
1847	1429831_at	BI684288	phosphoinositide-3-kinase_adaptor_protein_1	Pik3ap1	1.6	0	0	1.3	0.001	0.034	Cluster5
1848	1417460_at	NM_030694	interferon_induced_transmembrane_protein_2_///_interferon-induced_transmembrane_protein_2-like	Ifitm2_///_LOC631287	2.1	0	0	1.5	0	0	Cluster5
1849	1448591_at	NM_021281	cathepsin_S	Ctss	2.1	0	0	1.5	0	0	Cluster5
1850	1417189_at	NM_011190	proteasome_(prosome,_macropain)_28_subunit,_beta	Psme2	1.7	0	0	1.3	0	0	Cluster5
1851	1417172_at	BC008238	ubiquitin-conjugating_enzyme_E2L_6	Ube2l6	1.9	0	0	1.4	0	0.018	Cluster5
1852	1449731_s_at	AI462015	nuclear_factor_of_kappa_light_polypeptide_gene_enhancer_in_B_cells_inhibitor,_alpha	Nfkbia	2.6	0	0	1.5	0	0	Cluster5
1853	1424965_at	BC026563	leupaxin	Lpxn	1.8	0	0	1.3	0	0.018	Cluster5
1854	1438475_at	BM246462	cDNA_sequence_AB124611	AB124611	2	0	0	1.3	0.001	0.028	Cluster5
1855	1450234_at	AF237910	membrane-spanning_4-domains,_subfamily_A,_member_6C	Ms4a6c	6.6	0	0	2.2	0	0	Cluster5
1856	1456295_at	BB304874	RIKEN_cDNA_B230114P17_gene	B230114P17Rik	1.6	0	0	1.2	0.02	0.178	Cluster5
1857	1444320_at	BB201470	DDHD_domain_containing_2	Ddhd2	1.6	0	0	1.2	0.032	0.219	Cluster5
1858	1417580_s_at	NM_019414	selenium_binding_protein_1	Selenbp1	1.7	0	0	1.2	0.001	0.03	Cluster5
1859	1421322_a_at	NM_008394	interferon_regulatory_factor_9	Irf9	2.9	0	0	1.5	0	0.001	Cluster5
1860	1451426_at	AF316999	DEXH_(Asp-Glu-X-His)_box_polypeptide_58	Dhx58	2.1	0	0	1.3	0.003	0.072	Cluster5
1861	1448232_x_at	NM_009448	predicted_gene_5620_///_tubulin,_alpha_1C_pseudogene_///_tubulin_alpha-1C_chain-like_///_tubulin,_alpha_1A_///_tubulin,_alpha_1B_///_tubulin,_alpha_1C	Gm5620_///_Gm6682_///_LOC100862648_///_Tuba1a_///_Tuba1b_///_Tuba1c	2.2	0	0	1.4	0.004	0.074	Cluster5
1862	1425719_a_at	BC002019	N-myc_(and_STAT)_interactor	Nmi	2.4	0	0	1.5	0	0.001	Cluster5
1863	1417936_at	AF128196	chemokine_(C-C_motif)_ligand_9	Ccl9	2.3	0	0	1.5	0	0.007	Cluster5
1864	1455660_at	BB769628	colony_stimulating_factor_2_receptor,_beta,_low-affinity_(granulocyte-macrophage)	Csf2rb	5.4	0	0	2.2	0	0	Cluster5
1865	1454757_s_at	AW554405	interferon,_alpha-inducible_protein_27_like_1	Ifi27l1	2	0	0	1.4	0	0.001	Cluster5
1866	1428735_at	AK017979	CD69_antigen	Cd69	1.8	0	0	1.3	0.001	0.044	Cluster5
1867	1426600_at	BM209618	solute_carrier_family_2_(facilitated_glucose_transporter),_member_1	Slc2a1	2.1	0	0	1.4	0	0	Cluster5
1868	1416077_at	NM_009627	adrenomedullin	Adm	3.5	0	0	1.7	0	0.001	Cluster5
1869	1451361_a_at	BC027342	patatin-like_phospholipase_domain_containing_7	Pnpla7	2.2	0	0	1.4	0	0.005	Cluster5
1870	1448123_s_at	NM_009369	transforming_growth_factor,_beta_induced	Tgfbi	2.2	0	0	1.4	0	0.016	Cluster5
1871	1417629_at	NM_011172	proline_dehydrogenase	Prodh	1.7	0	0	1.2	0	0.016	Cluster5
1872	1448898_at	AF128196	chemokine_(C-C_motif)_ligand_9	Ccl9	2	0	0	1.3	0.004	0.083	Cluster5
1873	1440225_at	BB083808	G_protein-coupled_receptor_116	Gpr116	2	0	0	1.3	0.002	0.05	Cluster5
1874	1456574_at	BB224546	zinc_finger_protein_800	Zfp800	1.7	0	0	1.2	0.009	0.125	Cluster5
1875	1420088_at	AI462015	nuclear_factor_of_kappa_light_polypeptide_gene_enhancer_in_B_cells_inhibitor,_alpha	Nfkbia	2	0	0	1.3	0	0	Cluster5
1876	1426260_a_at	D87867	UDP-glucuronosyltransferase_1-9-like_///_UDP-glucuronosyltransferase_1-9-like_///_UDP_glucuronosyltransferase_1_family,_polypeptide_A1_///_UDP_glycosyltransferase_1_family,_polypeptide_A10_///_UDP_glucuronosyltransferase_1_family,_polypeptide_A2_///_UDP_glucuronosyltransferase_1_family,_polypeptide_A5_///_UDP_glucuronosyltransferase_1_family,_polypeptide_A6A_///_UDP_glucuronosyltransferase_1_fami…	LOC100048662_///_LOC100048744_///_Ugt1a1_///_Ugt1a10_///_Ugt1a2_///_Ugt1a5_///_Ugt1a6a_///_Ugt1a6b_///_Ugt1a7c_///_Ugt1a9	4.7	0	0	1.6	0.002	0.053	Cluster5
1877	1421897_at	AI385733	ELK1,_member_of_ETS_oncogene_family	Elk1	1.6	0	0	1.2	0.014	0.153	Cluster5
1878	1429183_at	AK005020	plakophilin_2	Pkp2	1.6	0	0	1.2	0.006	0.101	Cluster5
1879	1421392_a_at	NM_007464	baculoviral_IAP_repeat-containing_3	Birc3	2.2	0	0	1.3	0	0.014	Cluster5
1880	1435640_x_at	BE634869	RIKEN_cDNA_A130040M12_gene	A130040M12Rik	4.8	0	0	1.6	0	0.006	Cluster5
1881	1448306_at	NM_010907	nuclear_factor_of_kappa_light_polypeptide_gene_enhancer_in_B_cells_inhibitor,_alpha	Nfkbia	2.8	0	0	1.4	0	0	Cluster5
1882	1417483_at	AB026551	nuclear_factor_of_kappa_light_polypeptide_gene_enhancer_in_B_cells_inhibitor,_zeta	Nfkbiz	1.9	0	0	1.2	0.002	0.059	Cluster5
1883	1420499_at	NM_008102	GTP_cyclohydrolase_1	Gch1	1.7	0	0	1.2	0.015	0.157	Cluster5
1884	1452117_a_at	BB157866	FYN_binding_protein	Fyb	1.7	0	0	1.2	0.012	0.14	Cluster5
1885	1419208_at	NM_007746	mitogen-activated_protein_kinase_kinase_kinase_8	Map3k8	1.6	0	0	1.1	0.026	0.201	Cluster5
1886	1434089_at	BB426294	synaptopodin	Synpo	2.2	0	0	1.3	0.009	0.125	Cluster5
1887	1422280_at	AB032200	granzyme_K	Gzmk	2	0	0	1.2	0.012	0.142	Cluster5
1888	1419004_s_at	L16462	B_cell_leukemia/lymphoma_2_related_protein_A1a_///_B_cell_leukemia/lymphoma_2_related_protein_A1b_///_B_cell_leukemia/lymphoma_2_related_protein_A1d	Bcl2a1a_///_Bcl2a1b_///_Bcl2a1d	5.6	0	0	2.3	0	0	Cluster5
1889	1418465_at	NM_008677	neutrophil_cytosolic_factor_4	Ncf4	1.8	0	0	1.3	0	0.018	Cluster5
1890	1455500_at	AW556558	ring_finger_protein_213	Rnf213	3.1	0	0	1.8	0	0	Cluster5
1891	1425084_at	BC026200	GTPase,_IMAP_family_member_7	Gimap7	1.8	0	0	1.4	0.005	0.093	Cluster5
1892	1418930_at	NM_021274	chemokine_(C-X-C_motif)_ligand_10	Cxcl10	37.9	0	0	11.5	0	0	Cluster5
1893	1415983_at	NM_008879	lymphocyte_cytosolic_protein_1	Lcp1	2	0	0	1.6	0	0	Cluster5
1894	1451206_s_at	BC007144	cytohesin_1_interacting_protein	Cytip	5.8	0	0	3.3	0	0	Cluster5
1895	1416016_at	AW048052	transporter_1,_ATP-binding_cassette,_sub-family_B_(MDR/TAP)	Tap1	8.7	0	0	3.2	0	0	Cluster5
1896	1431591_s_at	AK019325	predicted_gene_9706_///_ISG15_ubiquitin-like_modifier	Gm9706_///_Isg15	6.6	0	0	2.8	0	0	Cluster5
1897	1417109_at	BC005738	tubulointerstitial_nephritis_antigen-like_1	Tinagl1	2	0	0	1.4	0	0.001	Cluster5
1898	1433837_at	AV365503	RIKEN_cDNA_8430408G22_gene	8430408G22Rik	2.2	0	0	1.5	0	0	Cluster5
1899	1436183_at	BB757349	zinc_finger_CCCH_type,_antiviral_1	Zc3hav1	1.6	0	0	1.3	0	0.008	Cluster5
1900	1448659_at	NM_007611	caspase_7	Casp7	1.8	0	0	1.4	0	0	Cluster5
1901	1418131_at	NM_018851	SAM_domain_and_HD_domain,_1	Samhd1	3.4	0	0	2	0	0	Cluster5
1902	1427511_at	AA170322	---	---	1.8	0	0	1.4	0	0.001	Cluster5
1903	1434202_a_at	BF682848	family_with_sequence_similarity_107,_member_A	Fam107a	1.6	0	0	1.3	0	0.005	Cluster5
1904	1456292_a_at	AV147875	vimentin	Vim	1.7	0	0	1.4	0.001	0.036	Cluster5
1905	1448397_at	BC016507	gap_junction_protein,_beta_6	Gjb6	1.8	0	0	1.4	0	0.001	Cluster5
1906	1450291_s_at	NM_022429	membrane-spanning_4-domains,_subfamily_A,_member_4C	Ms4a4c	5.5	0	0	2.6	0	0.004	Cluster5
1907	1450783_at	NM_008331	interferon-induced_protein_with_tetratricopeptide_repeats_1	Ifit1	9.6	0	0	3	0	0	Cluster5
1908	1450165_at	NM_011408	schlafen_2	Slfn2	1.9	0	0	1.4	0	0.002	Cluster5
1909	1416529_at	U25633	epithelial_membrane_protein_1	Emp1	9.4	0	0	3	0	0.001	Cluster5
1910	1415871_at	NM_009369	transforming_growth_factor,_beta_induced	Tgfbi	1.9	0	0	1.4	0	0.006	Cluster5
1911	1427201_at	AJ277212	musculoskeletal,_embryonic_nuclear_protein_1	Mustn1	1.8	0	0	1.3	0	0.01	Cluster5
1912	1418674_at	AB015978	oncostatin_M_receptor	Osmr	5.3	0	0	2.2	0	0	Cluster5
1913	1421009_at	BB741897	radical_S-adenosyl_methionine_domain_containing_2	Rsad2	10	0	0	2.9	0	0	Cluster5
1914	1415897_a_at	BI150149	microsomal_glutathione_S-transferase_1	Mgst1	1.6	0	0	1.3	0.005	0.091	Cluster5
1915	1426808_at	X16834	lectin,_galactose_binding,_soluble_3	Lgals3	3.8	0	0	1.8	0	0	Cluster5
1916	1419810_x_at	AU043488	Rho_GTPase_activating_protein_9	Arhgap9	1.6	0	0	1.2	0.006	0.097	Cluster5
1917	1454268_a_at	AK018713	cytochrome_b-245,_alpha_polypeptide	Cyba	2.2	0	0	1.5	0	0	Cluster5
1918	1426168_a_at	U95921	T_cell_receptor_alpha_variable_9D-3	Trav9d-3	2.2	0	0	1.5	0	0.008	Cluster5
1919	1424857_a_at	AF220142	tripartite_motif-containing_34A	Trim34a	3.2	0	0	1.8	0	0.001	Cluster5
1920	1427381_at	L38281	immunoresponsive_gene_1	Irg1	1.6	0	0	1.3	0.032	0.22	Cluster5
1921	1448929_at	NM_028784	coagulation_factor_XIII,_A1_subunit	F13a1	2.2	0	0	1.7	0	0	Cluster5
1922	1449049_at	AF316985	toll-like_receptor_1	Tlr1	1.8	0	0	1.5	0	0.009	Cluster5
1923	1448436_a_at	NM_008390	interferon_regulatory_factor_1	Irf1	3.5	0	0	2.3	0	0	Cluster5
1924	1448696_at	NM_010417	hephaestin	Heph	1.9	0	0	1.5	0	0.016	Cluster5
1925	1428663_at	AK017223	sphingomyelin_synthase_2	Sgms2	1.6	0	0	1.4	0.004	0.075	Cluster5
1926	1418826_at	NM_027209	membrane-spanning_4-domains,_subfamily_A,_member_6B	Ms4a6b	8	0	0	3.3	0	0	Cluster5
1927	1428909_at	C85657	RIKEN_cDNA_A130040M12_gene	A130040M12Rik	5.7	0	0	2.7	0	0	Cluster5
1928	1427102_at	AF099975	schlafen_4	Slfn4	2.9	0	0	1.8	0.002	0.06	Cluster5
1929	1425538_x_at	BC016891	carcinoembryonic_antigen-related_cell_adhesion_molecule_1	Ceacam1	1.6	0	0	1.3	0.004	0.082	Cluster5
1930	1416714_at	BG069095	interferon_regulatory_factor_8	Irf8	2.7	0	0	1.7	0	0	Cluster5
1931	1426276_at	AY075132	interferon_induced_with_helicase_C_domain_1	Ifih1	3.1	0	0	1.8	0	0	Cluster5
1932	1426246_at	Z25469	protein_S_(alpha)	Pros1	1.7	0	0	1.3	0	0.018	Cluster5
1933	1422962_a_at	NM_010724	proteasome_(prosome,_macropain)_subunit,_beta_type_8_(large_multifunctional_peptidase_7)	Psmb8	7.7	0	0	4.1	0	0	Cluster5
1934	1419282_at	U50712	chemokine_(C-C_motif)_ligand_12_///_c-C_motif_chemokine_12-like	Ccl12_///_LOC100862578	11.3	0	0	5.3	0	0	Cluster5
1935	1417266_at	BC002073	chemokine_(C-C_motif)_ligand_6	Ccl6	3	0	0	2.1	0	0	Cluster5
1936	1418142_at	NM_008428	potassium_inwardly-rectifying_channel,_subfamily_J,_member_8	Kcnj8	1.7	0	0	1.4	0	0	Cluster5
1937	1448562_at	NM_009477	uridine_phosphorylase_1	Upp1	3.1	0	0	2.1	0	0.003	Cluster5
1938	1423467_at	BB199001	membrane-spanning_4-domains,_subfamily_A,_member_4B	Ms4a4b	20.3	0	0	7	0	0	Cluster5
1939	1450696_at	NM_013585	proteasome_(prosome,_macropain)_subunit,_beta_type_9_(large_multifunctional_peptidase_2)	Psmb9	7.7	0	0	4	0	0	Cluster5
1940	1452348_s_at	AI481797	interferon_activated_gene_204_///_interferon_activated_gene_205_///_myeloid_cell_nuclear_differentiation_antigen_///_myeloid_nuclear_differentiation_antigen_like	Ifi204_///_Ifi205_///_Mnda_///_Mndal	6.2	0	0	3.4	0	0	Cluster5
1941	1437726_x_at	BB111335	complement_component_1,_q_subcomponent,_beta_polypeptide	C1qb	2.9	0	0	2.1	0	0	Cluster5
1942	1452717_at	BM230959	solute_carrier_family_25_(mitochondrial_carrier,_phosphate_carrier),_member_24	Slc25a24	1.7	0	0	1.4	0	0.007	Cluster5
1943	1417821_at	NM_033075	DNA_segment,_Chr_17,_human_D6S56E_5	D17H6S56E-5	3.2	0	0	2.1	0	0	Cluster5
1944	1438868_at	AV280841	DNA_segment,_Chr_14,_ERATO_Doi_668,_expressed	D14Ertd668e	3.7	0	0	2.3	0	0	Cluster5
1945	1458589_at	BB485297	---	---	9	0	0	4.1	0	0	Cluster5
1946	1437432_a_at	BM244351	tripartite_motif-containing_12A	Trim12a	2.1	0	0	1.6	0	0	Cluster5
1947	1420273_x_at	AV340322	SAM_domain_and_HD_domain,_1	Samhd1	1.6	0	0	1.4	0	0.004	Cluster5
1948	1416942_at	NM_030711	endoplasmic_reticulum_aminopeptidase_1	Erap1	2.1	0	0	1.6	0	0	Cluster5
1949	1442294_at	BB636451	RIKEN_cDNA_A530053G22_gene	A530053G22Rik	1.9	0	0	1.5	0	0.008	Cluster5
1950	1460351_at	BC021916	predicted_gene_12854_///_S100_calcium_binding_protein_A11_(calgizzarin)	Gm12854_///_S100a11	1.8	0	0	1.5	0	0.021	Cluster5
1951	1429947_a_at	AK008179	Z-DNA_binding_protein_1	Zbp1	3.6	0	0	2.3	0	0	Cluster5
1952	1460603_at	BB145092	sterile_alpha_motif_domain_containing_9-like	Samd9l	2.6	0	0	1.9	0	0	Cluster5
1953	1450792_at	NM_011662	TYRO_protein_tyrosine_kinase_binding_protein	Tyrobp	1.6	0	0	1.4	0	0	Cluster5
1954	1422622_at	NM_008713	nitric_oxide_synthase_3,_endothelial_cell	Nos3	1.6	0	0	1.4	0	0.003	Cluster5
1955	1452349_x_at	AI481797	interferon_activated_gene_205_///_myeloid_cell_nuclear_differentiation_antigen	Ifi205_///_Mnda	7.9	0	0	4	0	0	Cluster5
1956	1416498_at	NM_008908	peptidylprolyl_isomerase_C	Ppic	1.6	0	0	1.4	0.001	0.032	Cluster5
